# Supplementary material for: Metal-free synthesis of gem-silylboronate esters and their Pd(0)-catalyzed cross-coupling with aryliodides
Source: Royal Society of Chemistry journal article supplement (doi:10.1039/c9ob01006h), 2019-01-01

## ***Electronic Supplementary Information***

# **Synthesis of *gem*-Silylboronate Esters and Their Pd(0)-Catalyzed Cross-Coupling with Aryliodides**

Chaoqiang Wu,<sup>a</sup> Zhicheng Bao,<sup>a</sup> Xing Xu,<sup>a</sup> Jianbo Wang\*<sup>ab</sup>

<sup>a</sup>*Beijing National Laboratory of Molecular Sciences (BNLMS), Key Laboratory of Bioorganic Chemistry and Molecular Engineering of Ministry of Education, College of Chemistry, Peking University, Beijing 100871, China*

<sup>b</sup>*State Key Laboratory of Organometallic Chemistry, Chinese Academy of Sciences, Shanghai 200032, China*  
*Email: wangjb@pku.edu.cn*

### **Table of Contents**

|                                                                        |         |
|------------------------------------------------------------------------|---------|
| 1. <sup>1</sup> H and <sup>13</sup> C NMR spectra of <b>3a-w</b> ..... | S2-S24  |
| 2. <sup>1</sup> H and <sup>13</sup> C NMR spectra of <b>5a-u</b> ..... | S25-S45 |
| 1. <sup>1</sup> H and <sup>13</sup> C NMR spectra of <b>6-10</b> ..... | S46-S50 |

# 1. $^1\text{H}$ and $^{13}\text{C}$ NMR spectra of **3a-w**

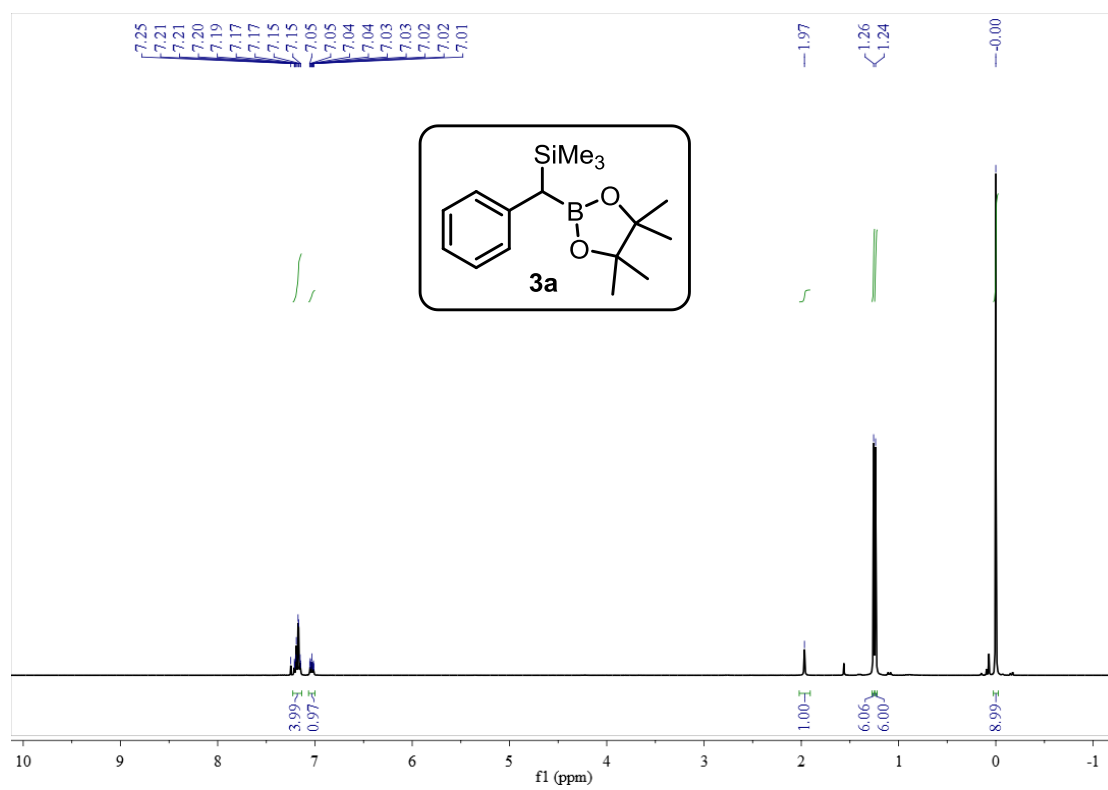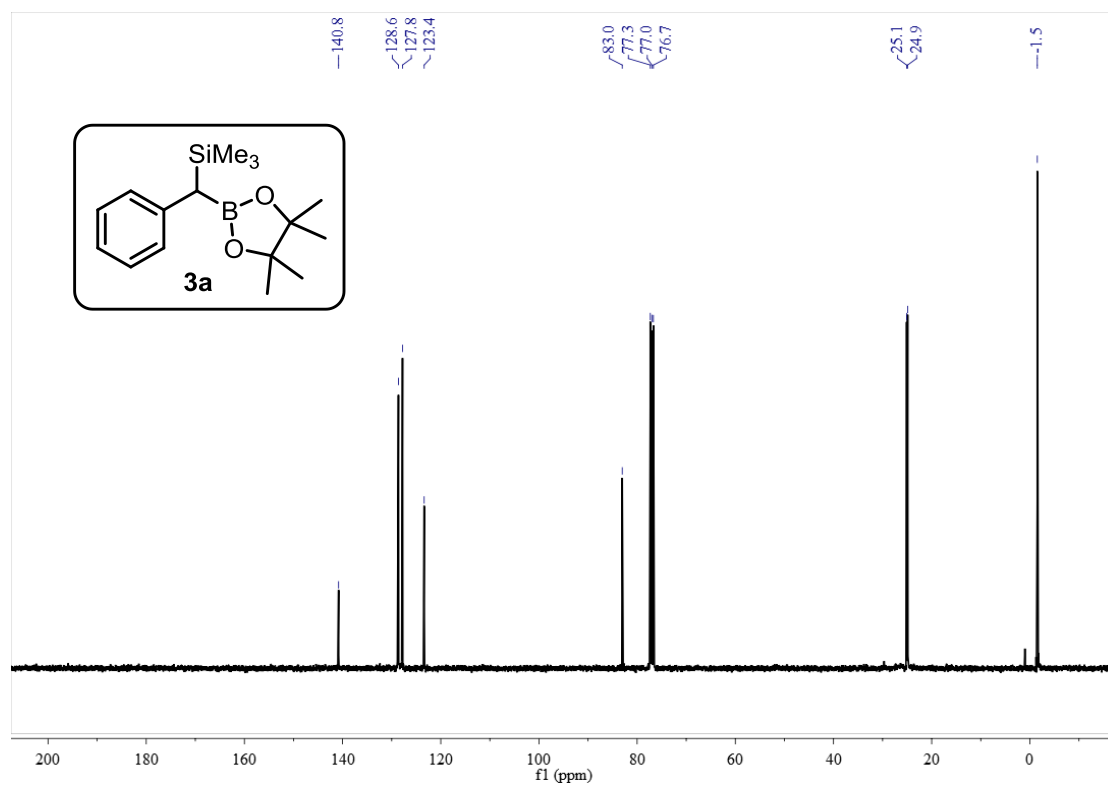

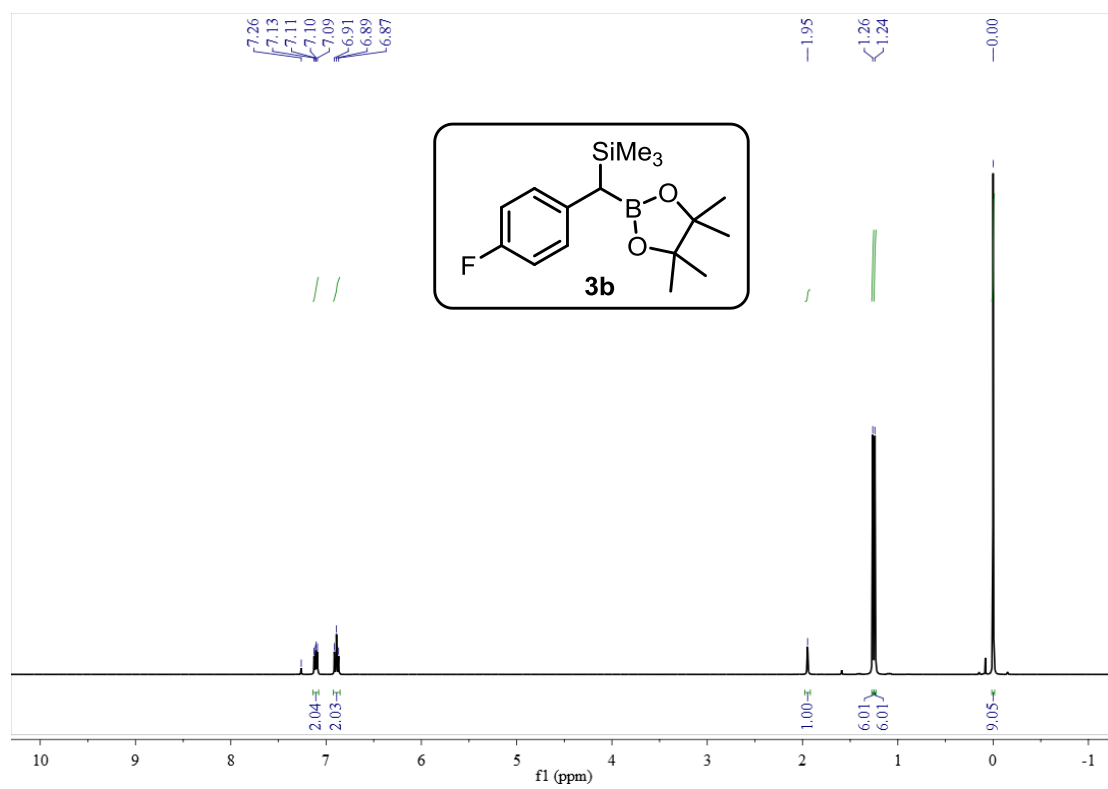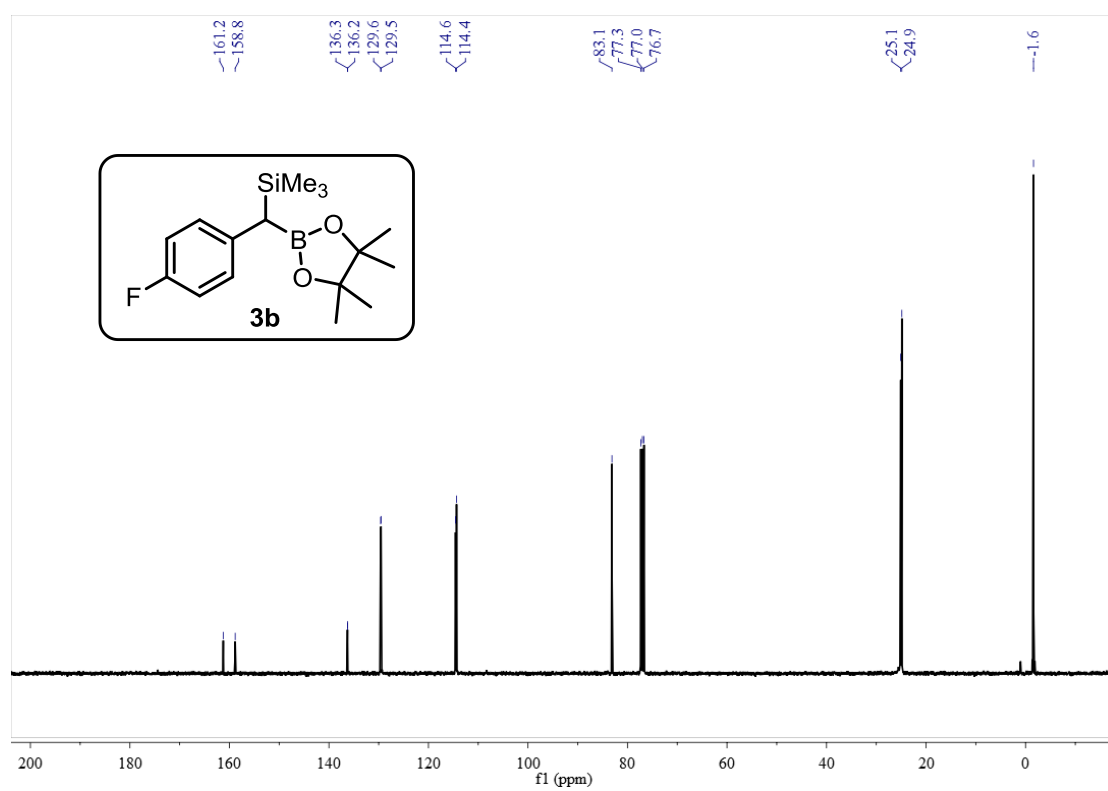

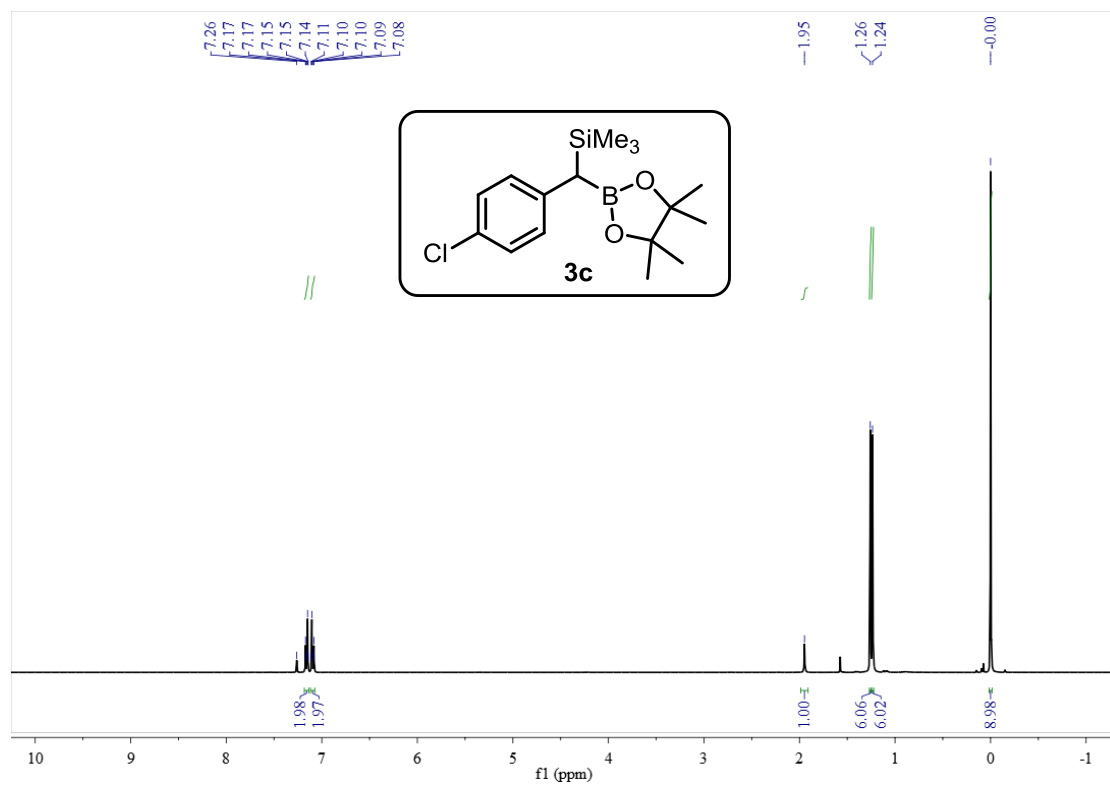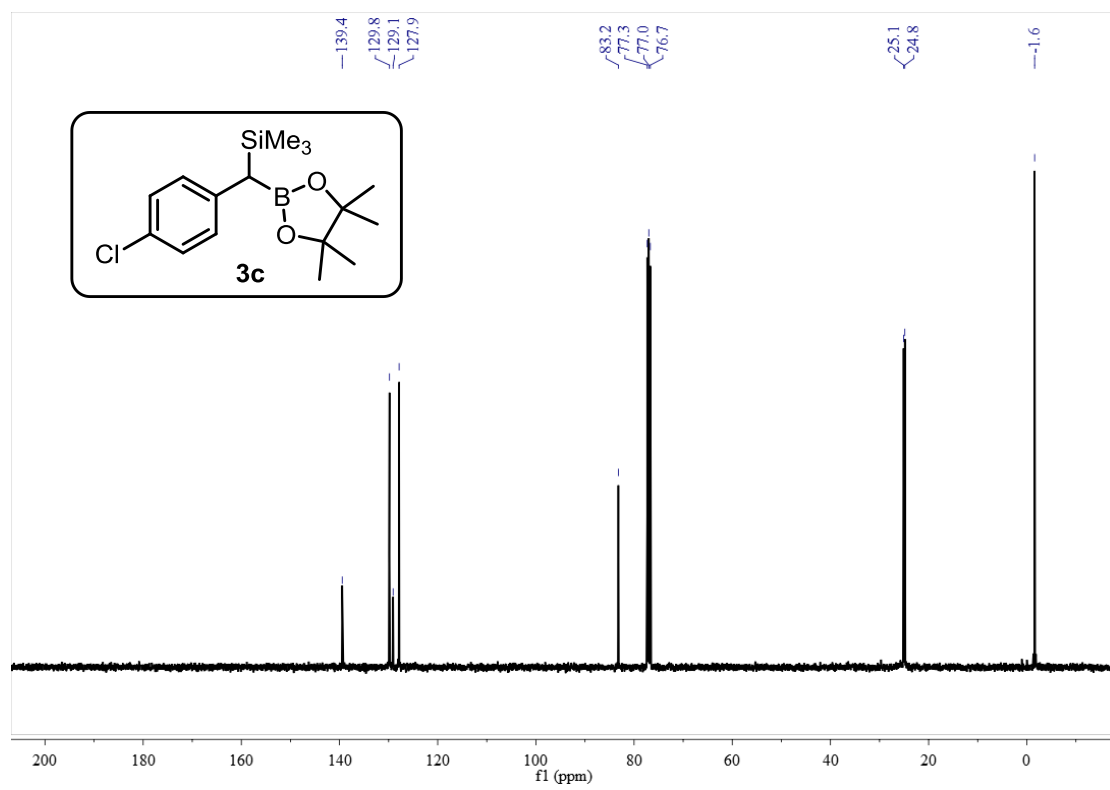

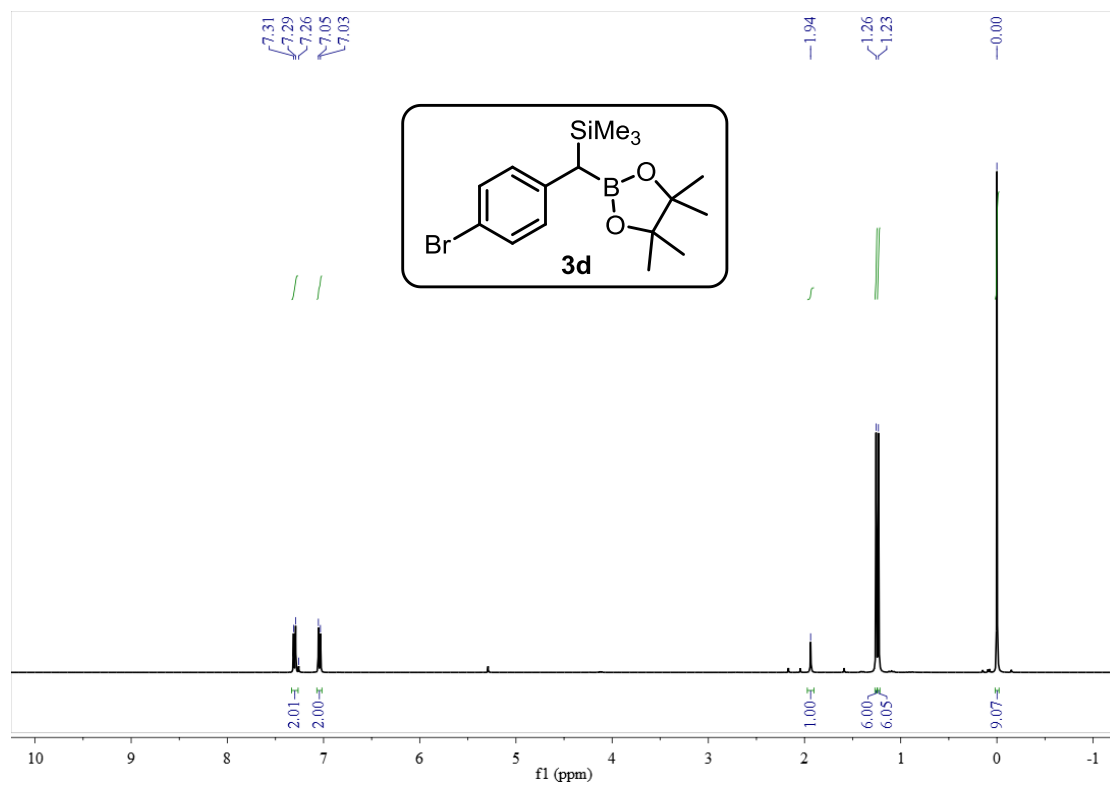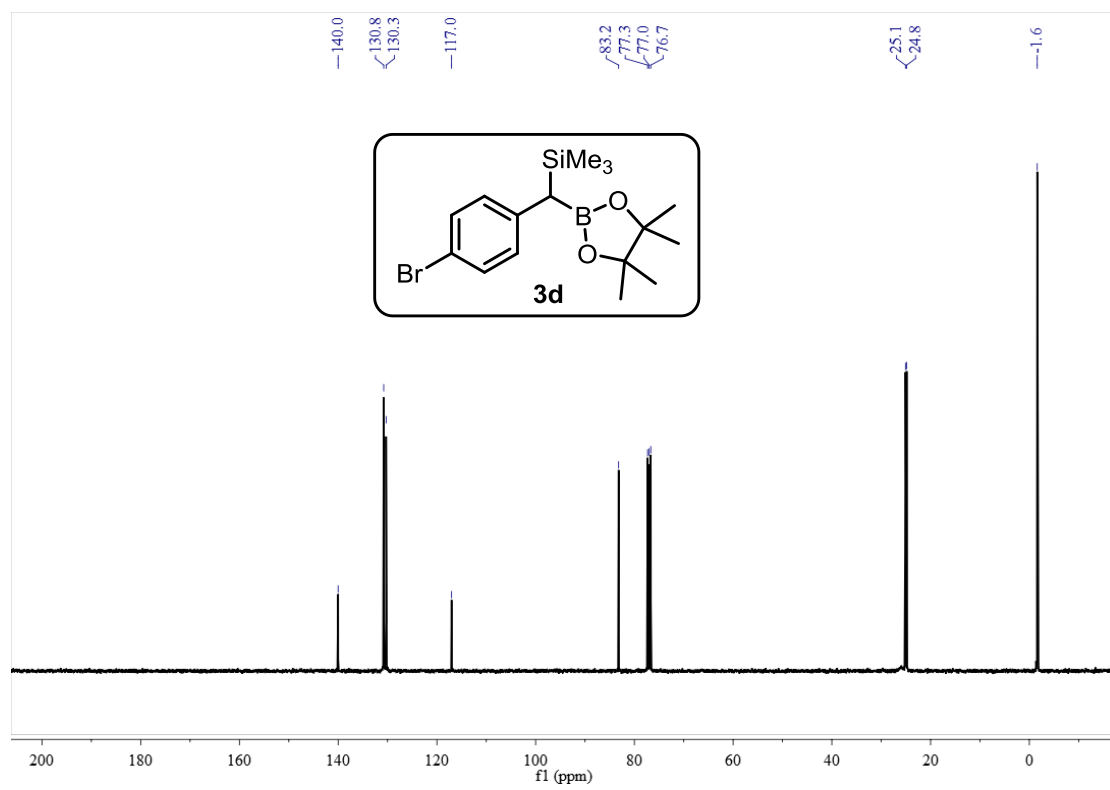

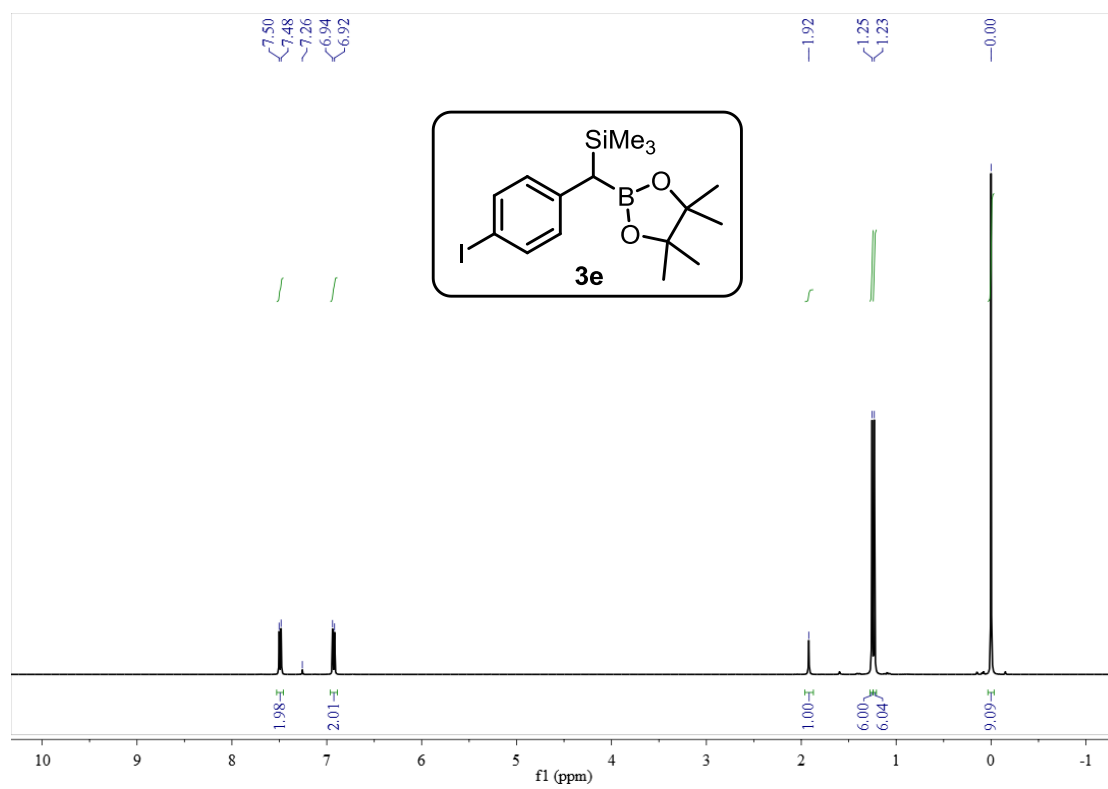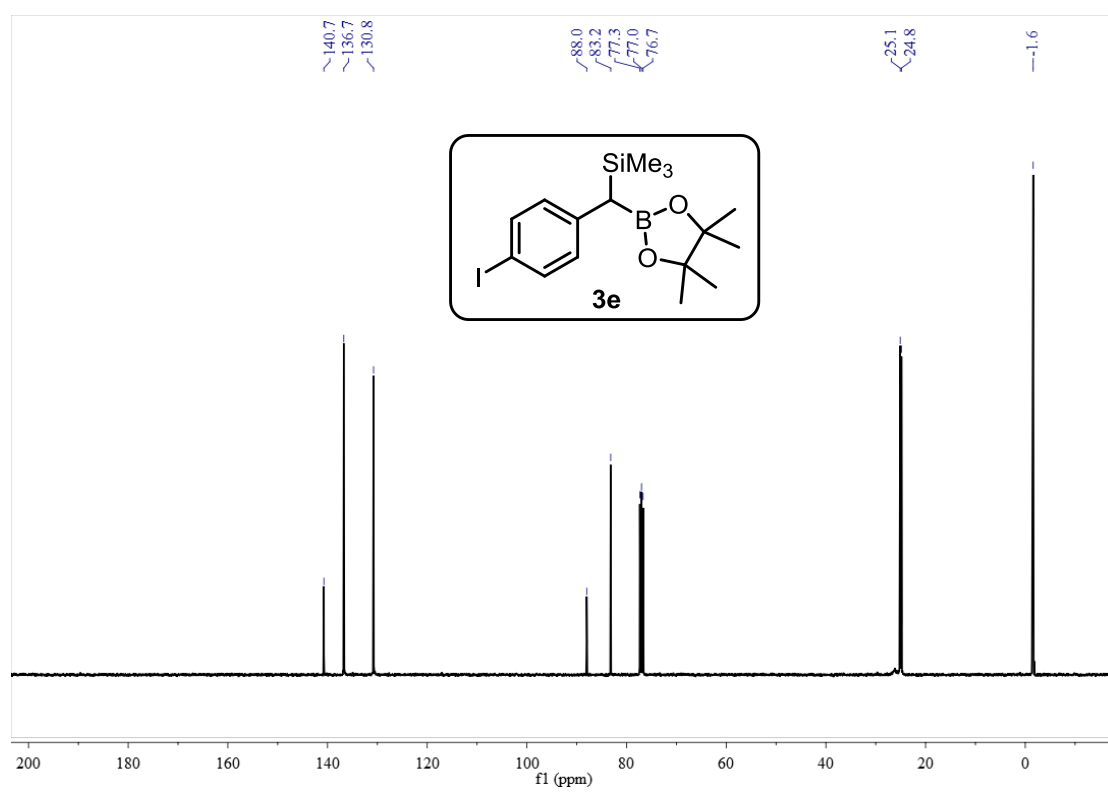

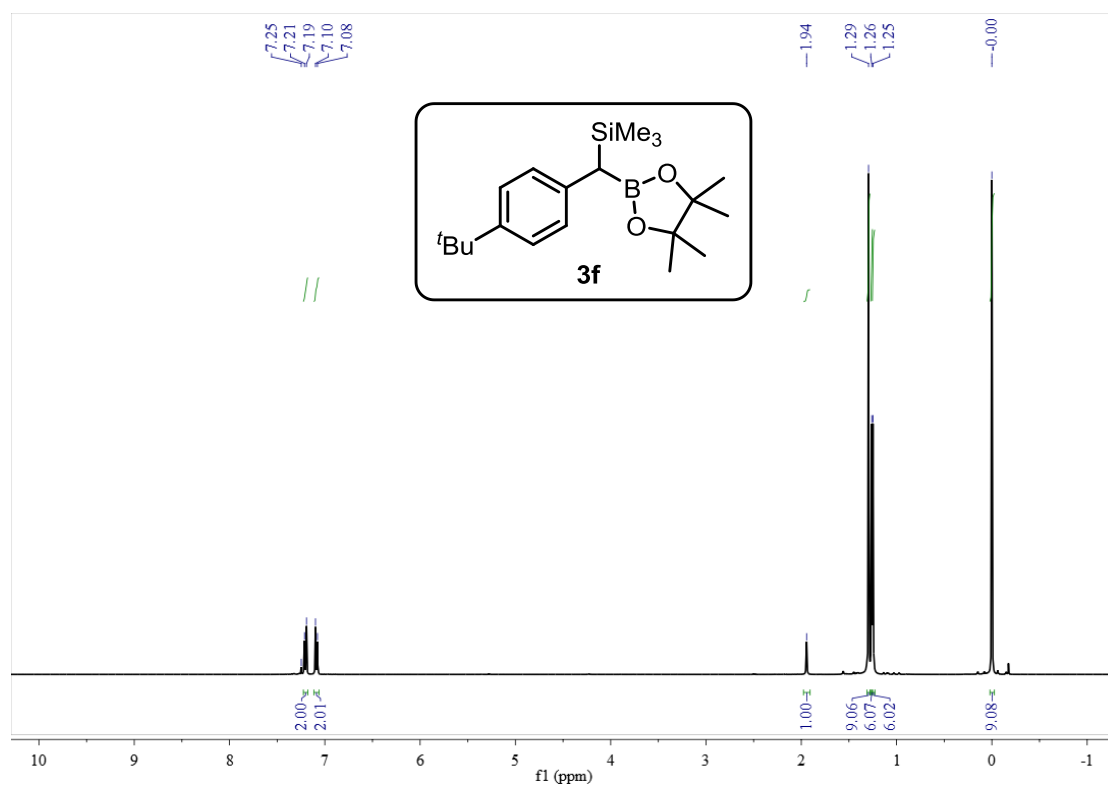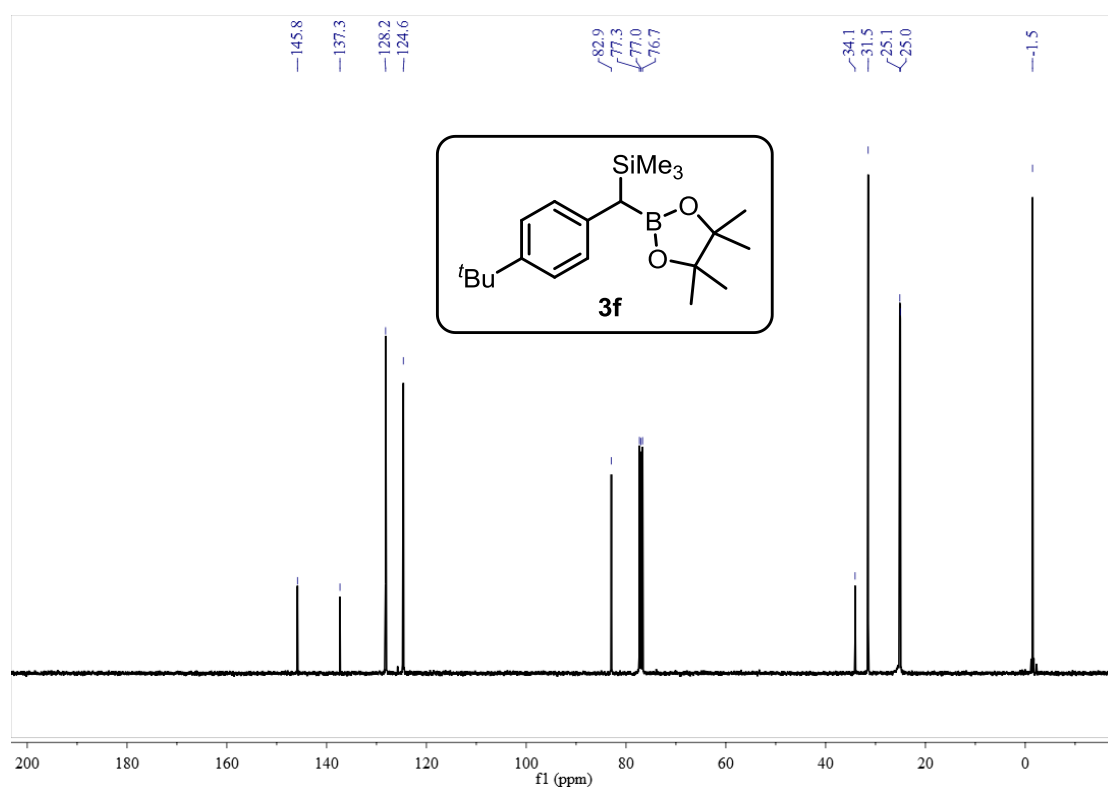

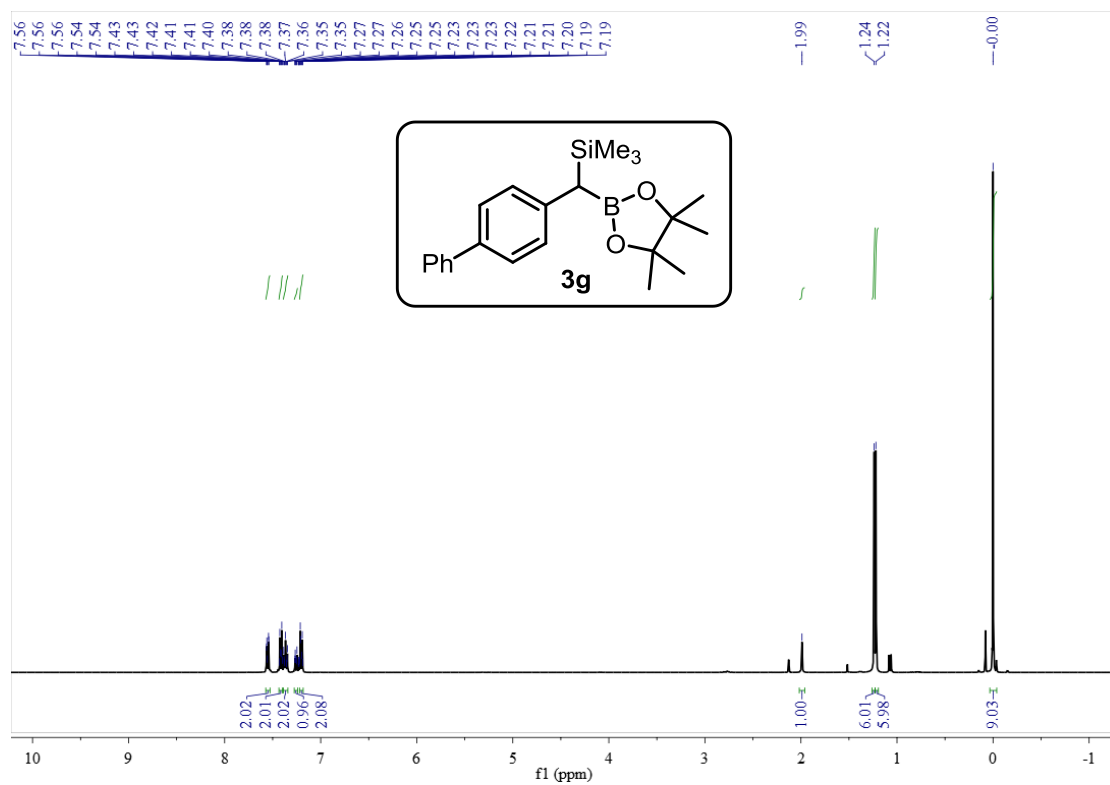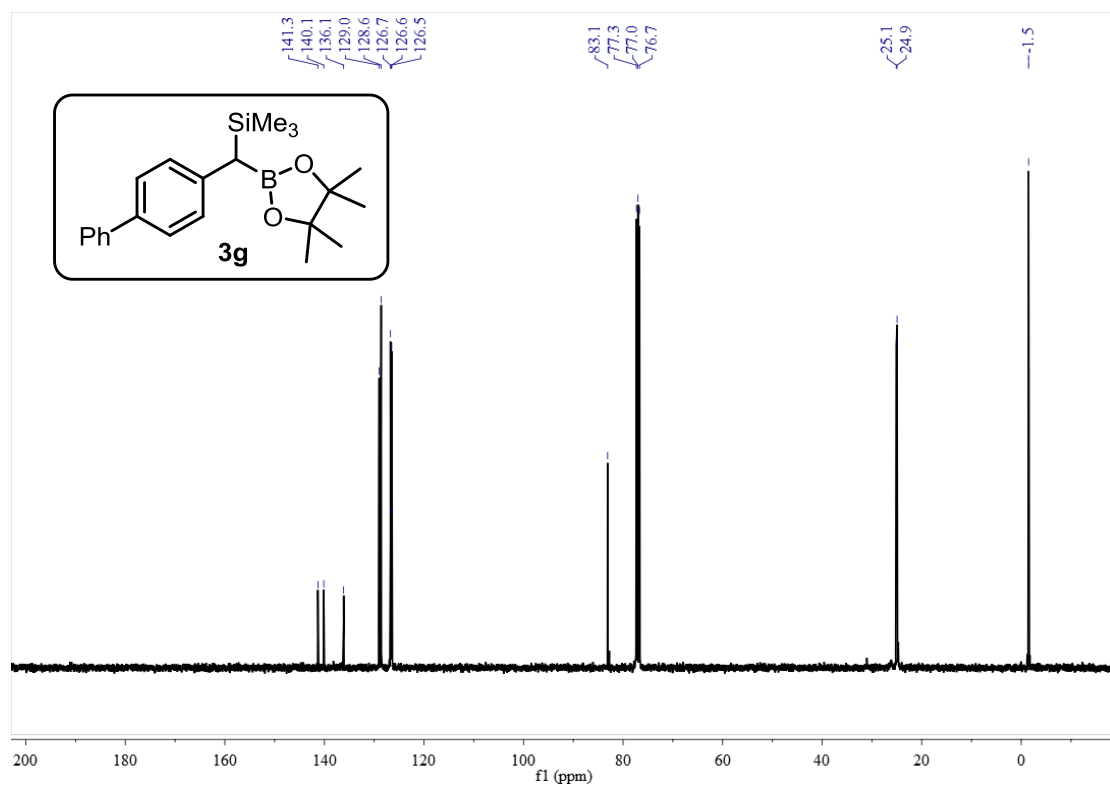



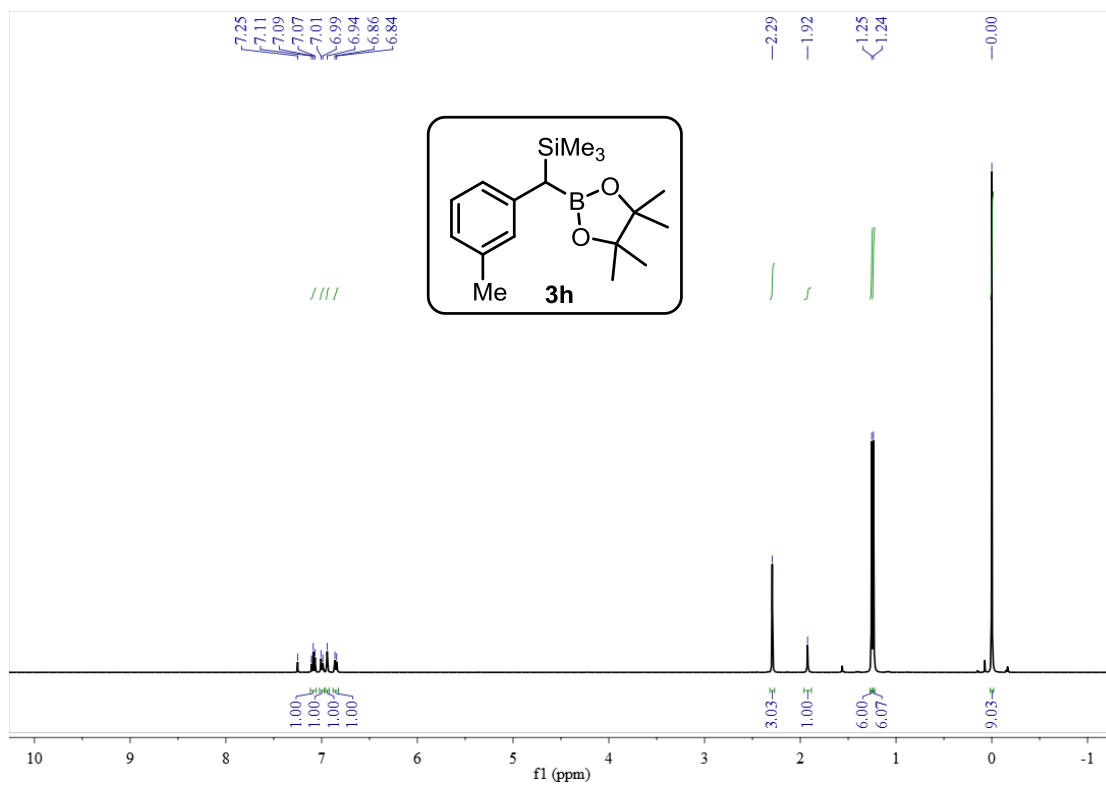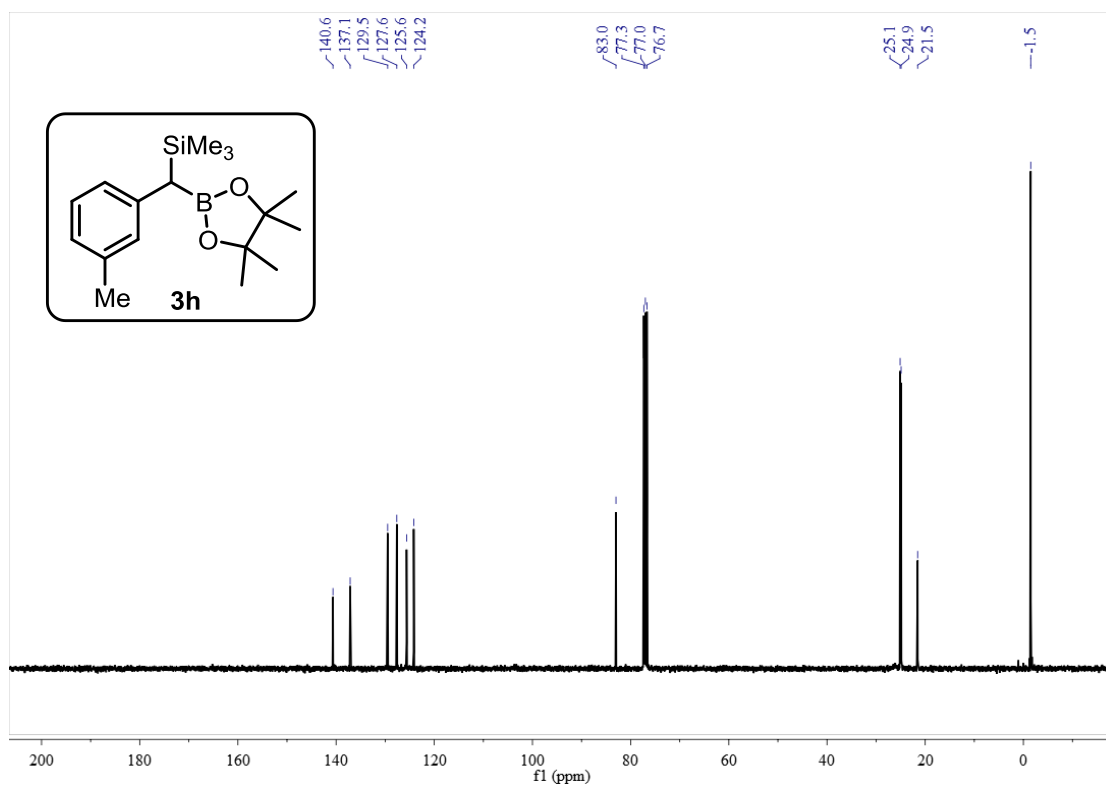

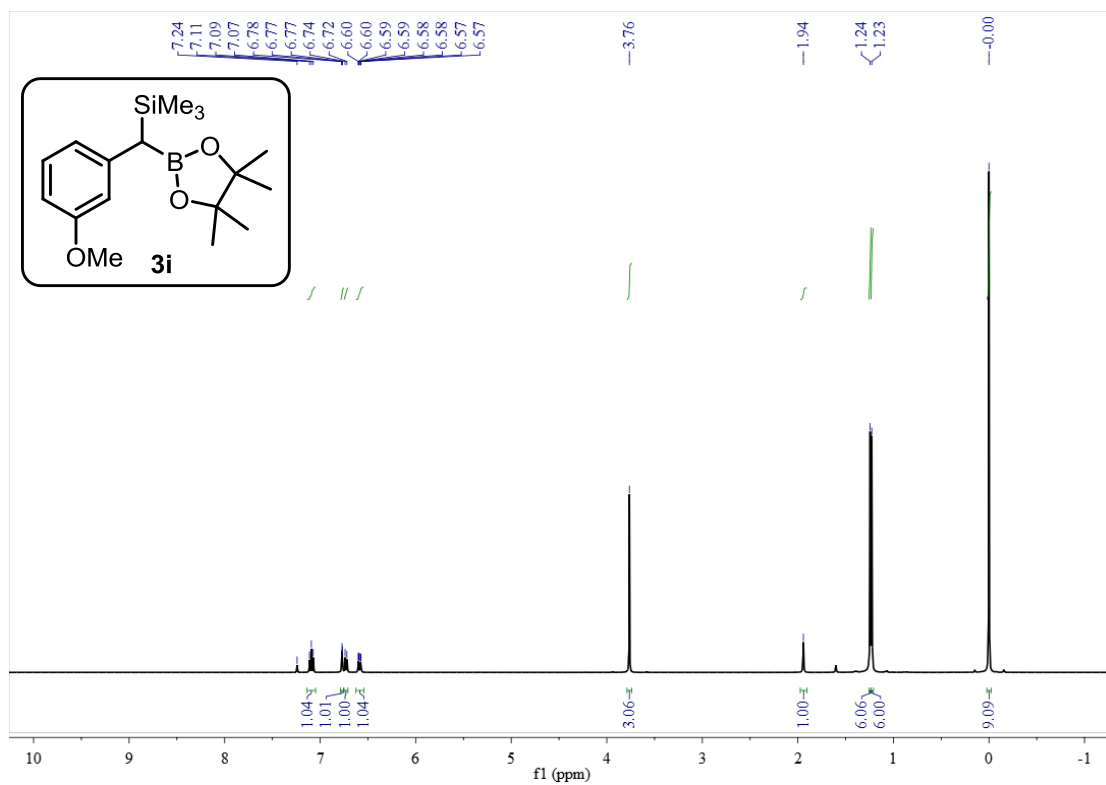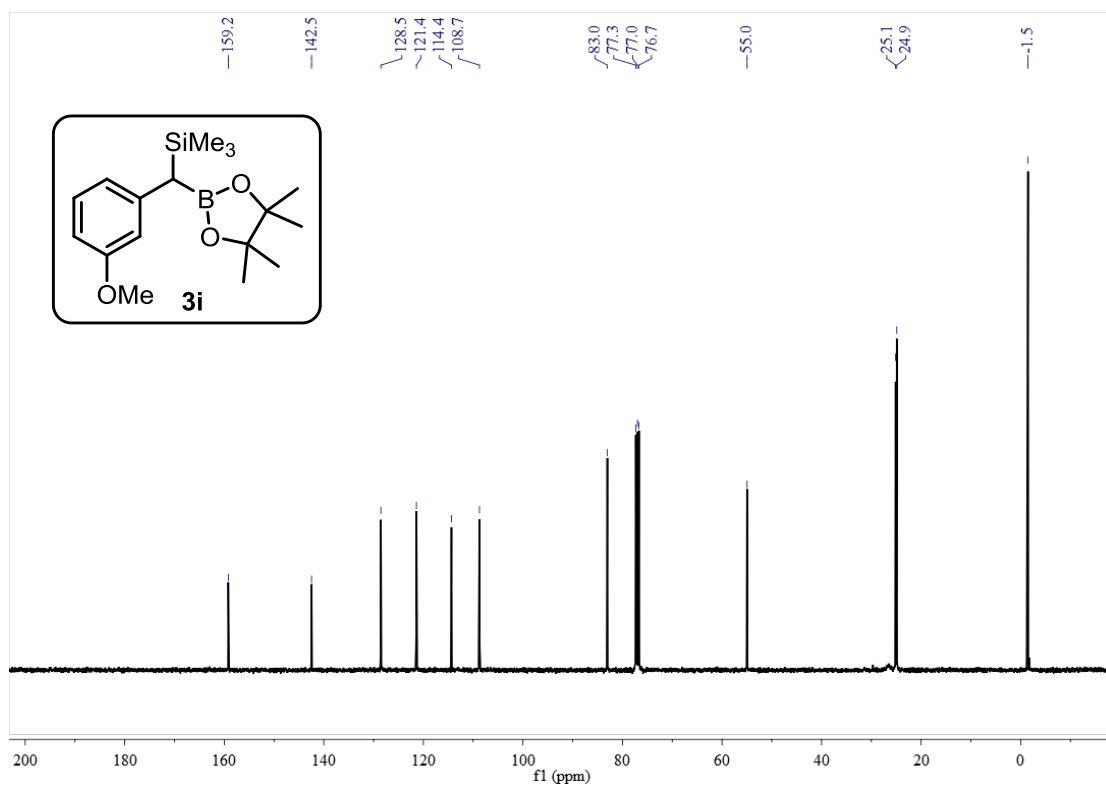

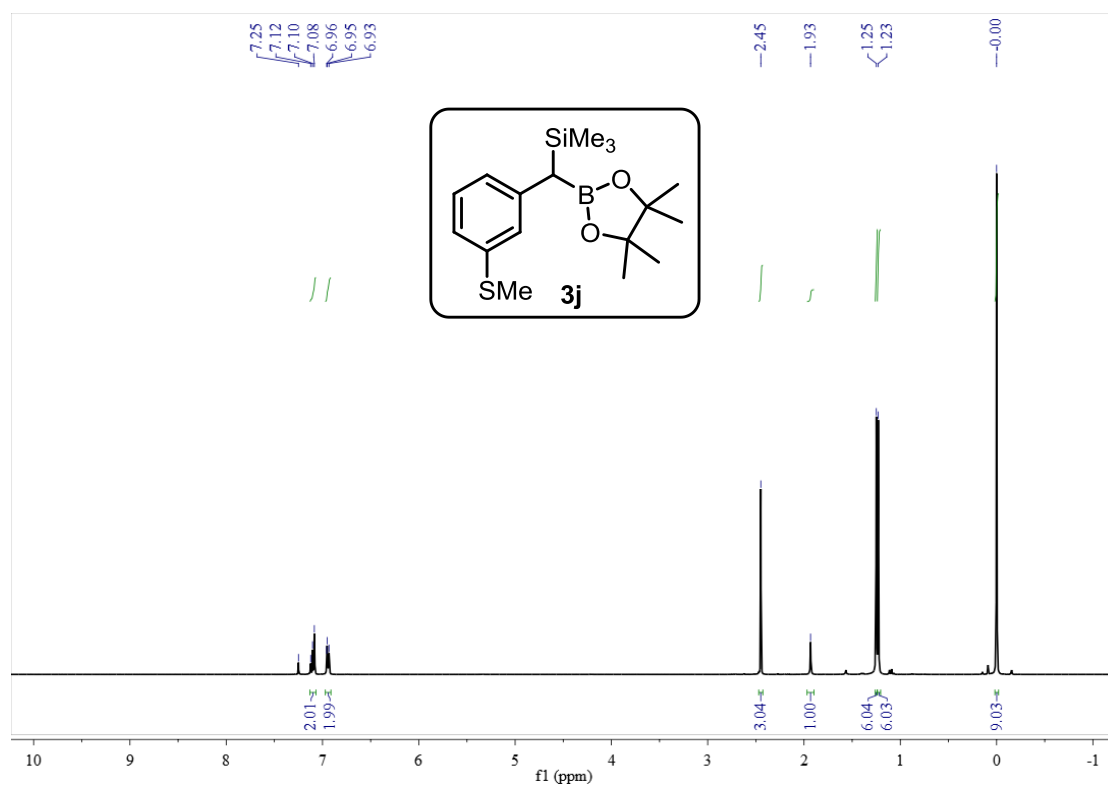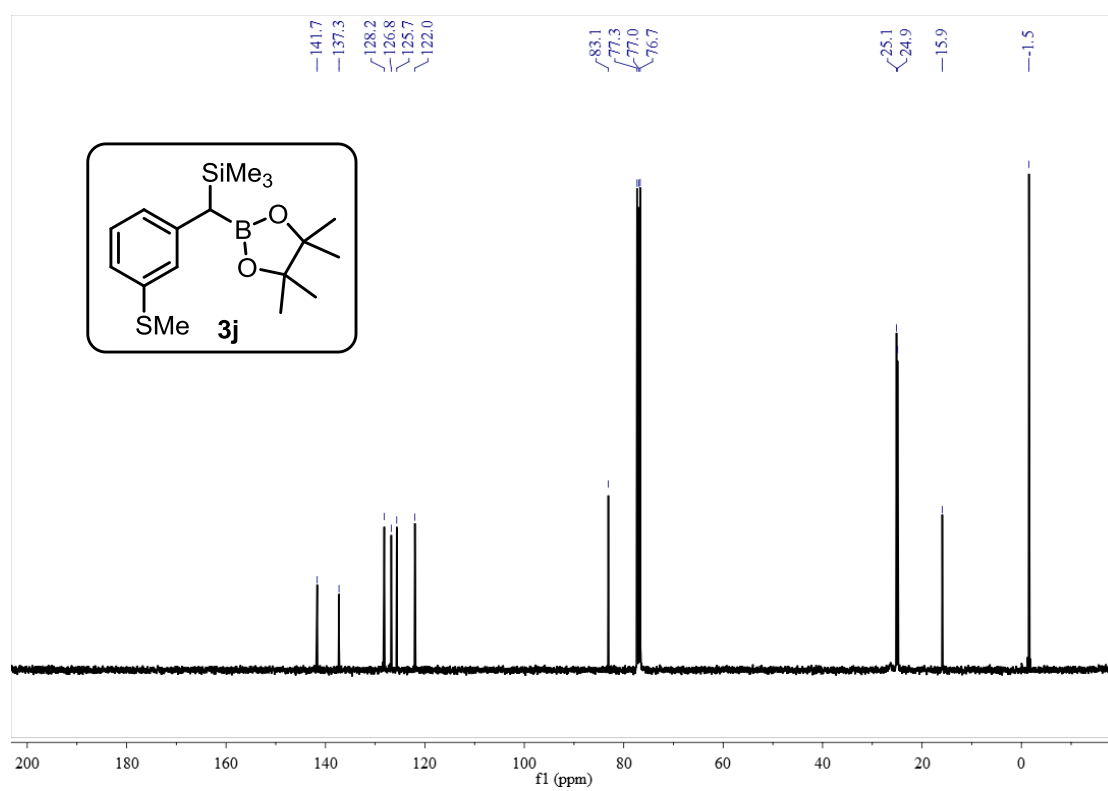

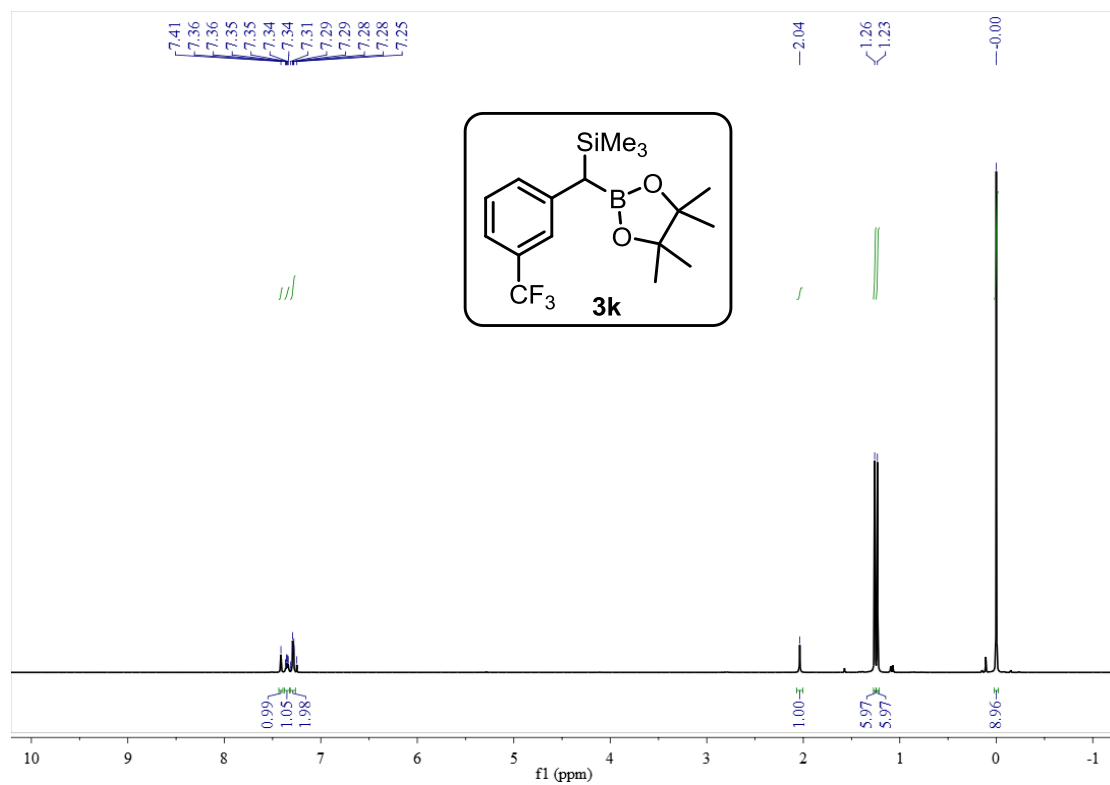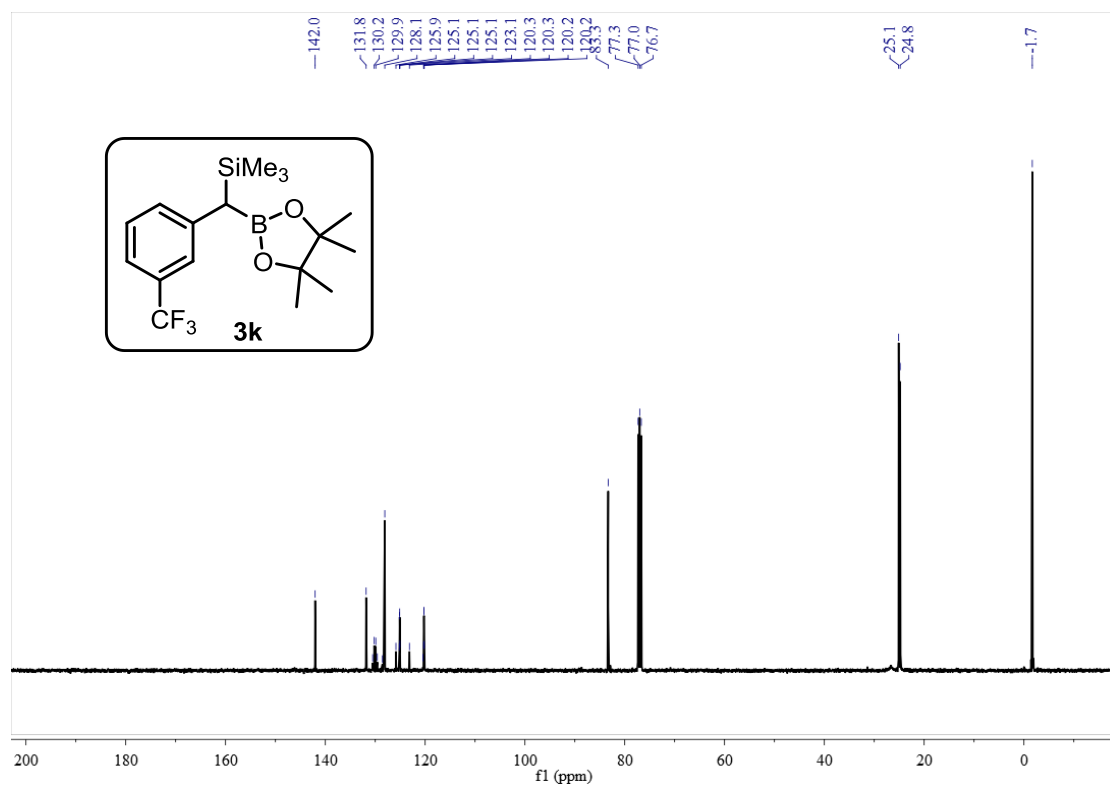

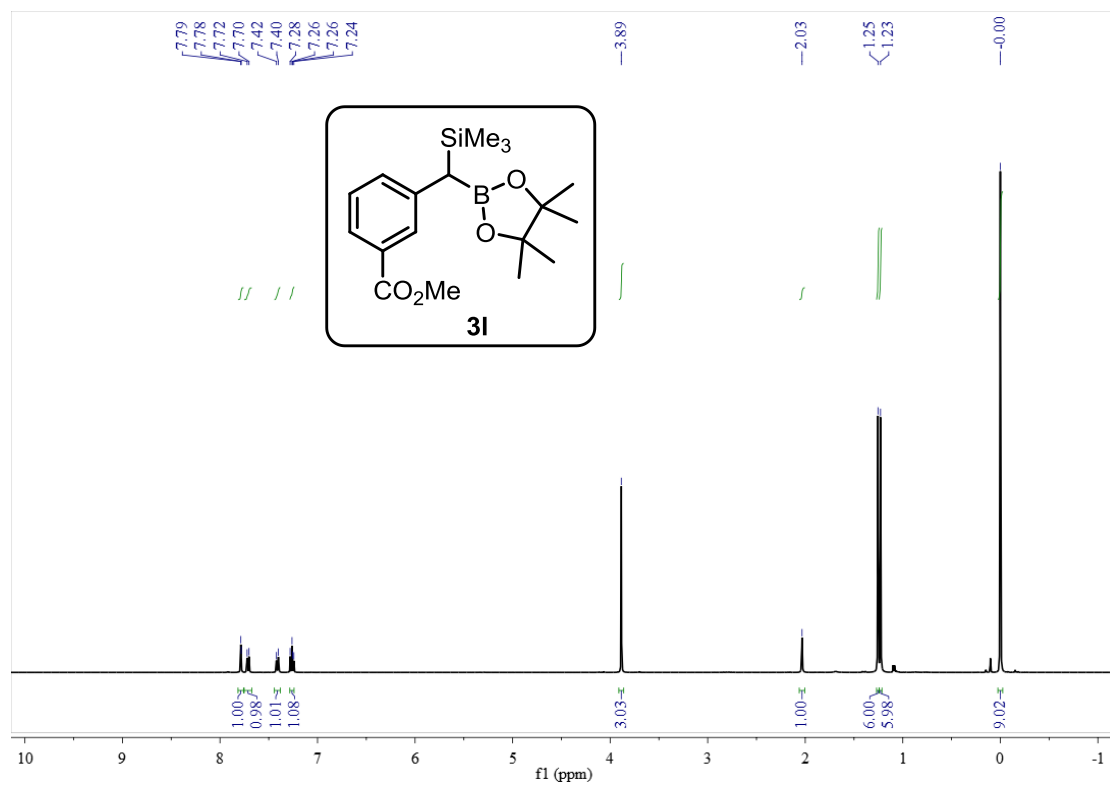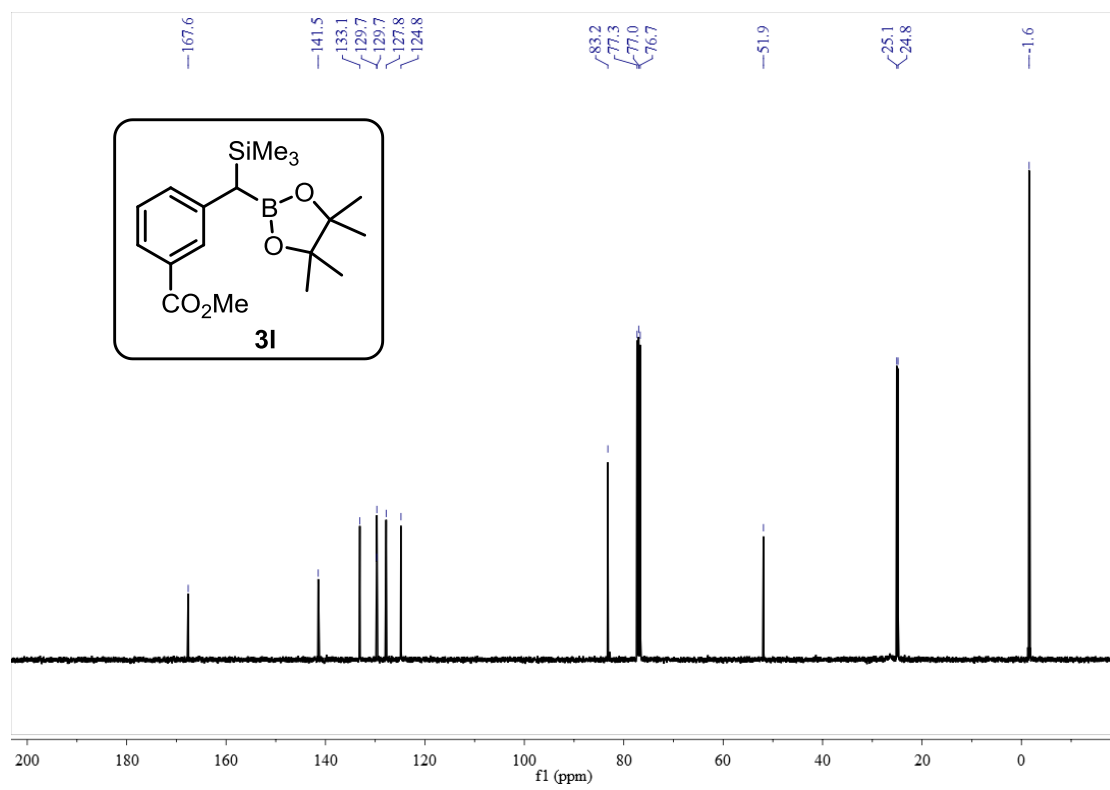

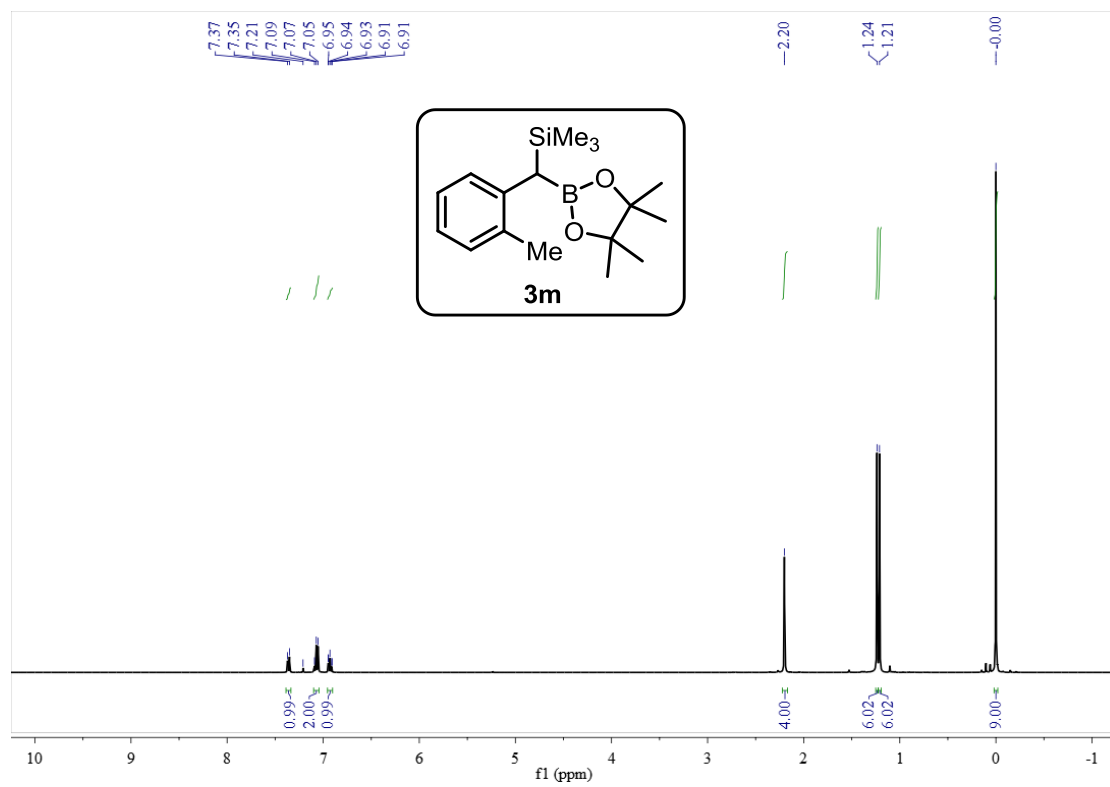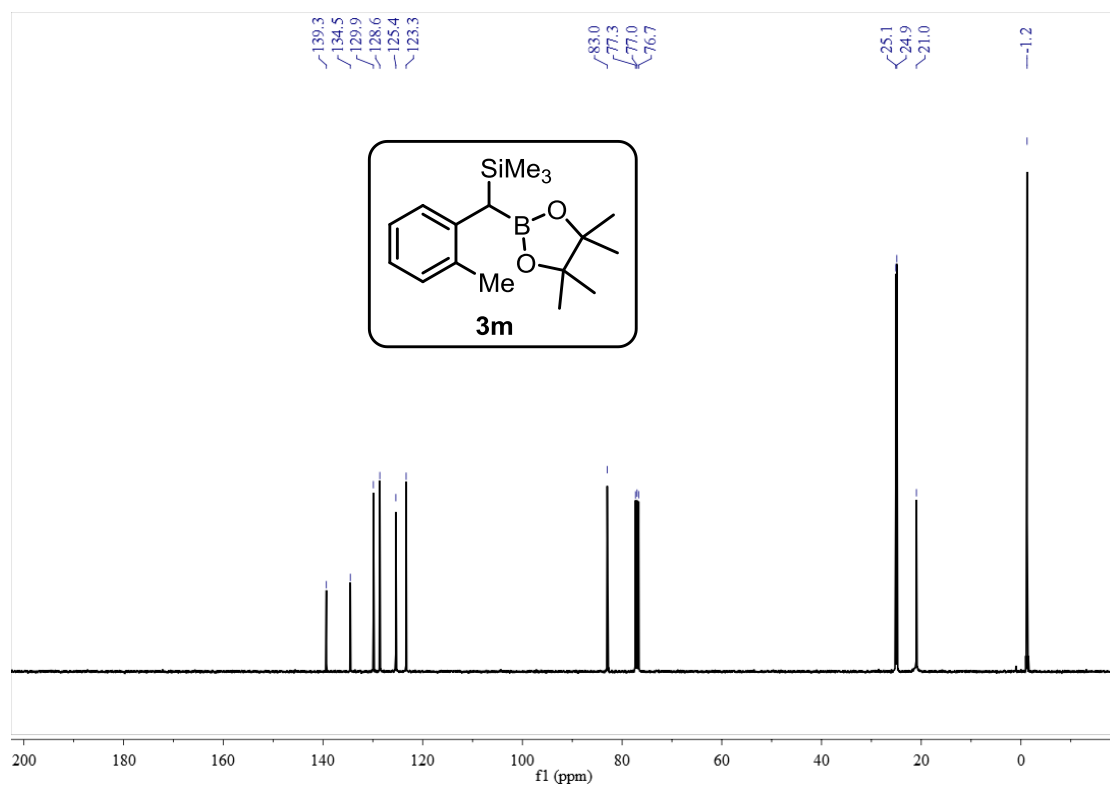

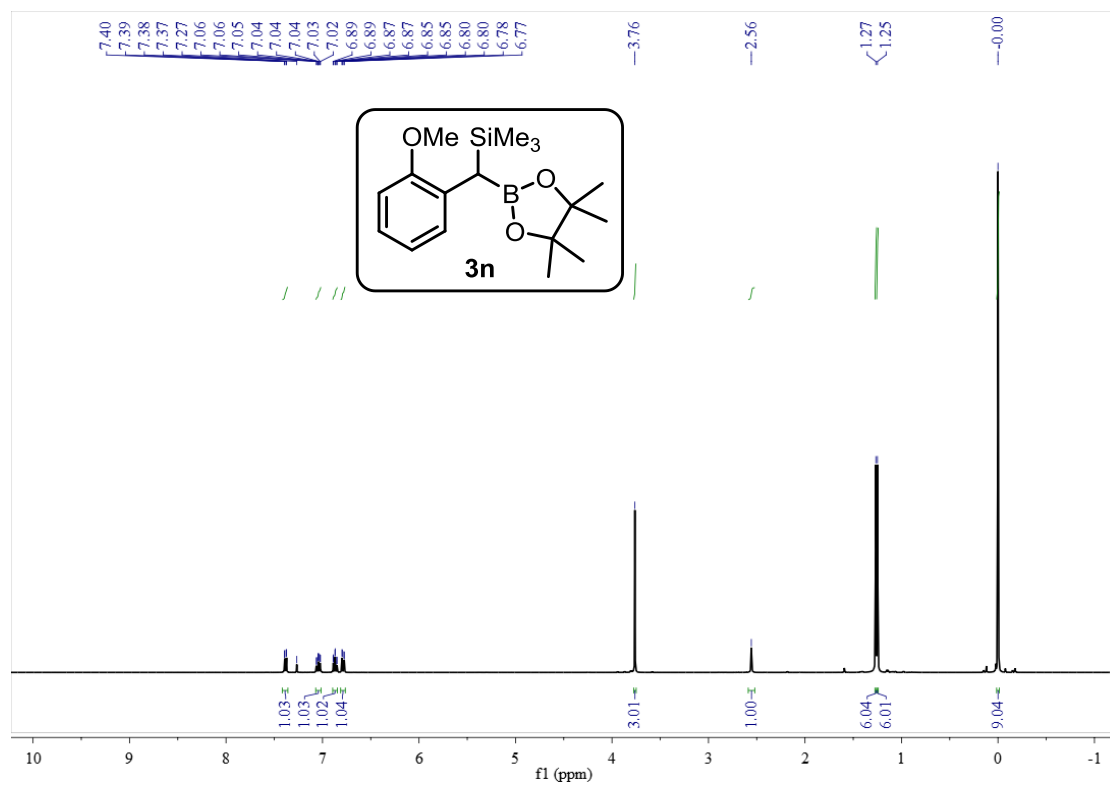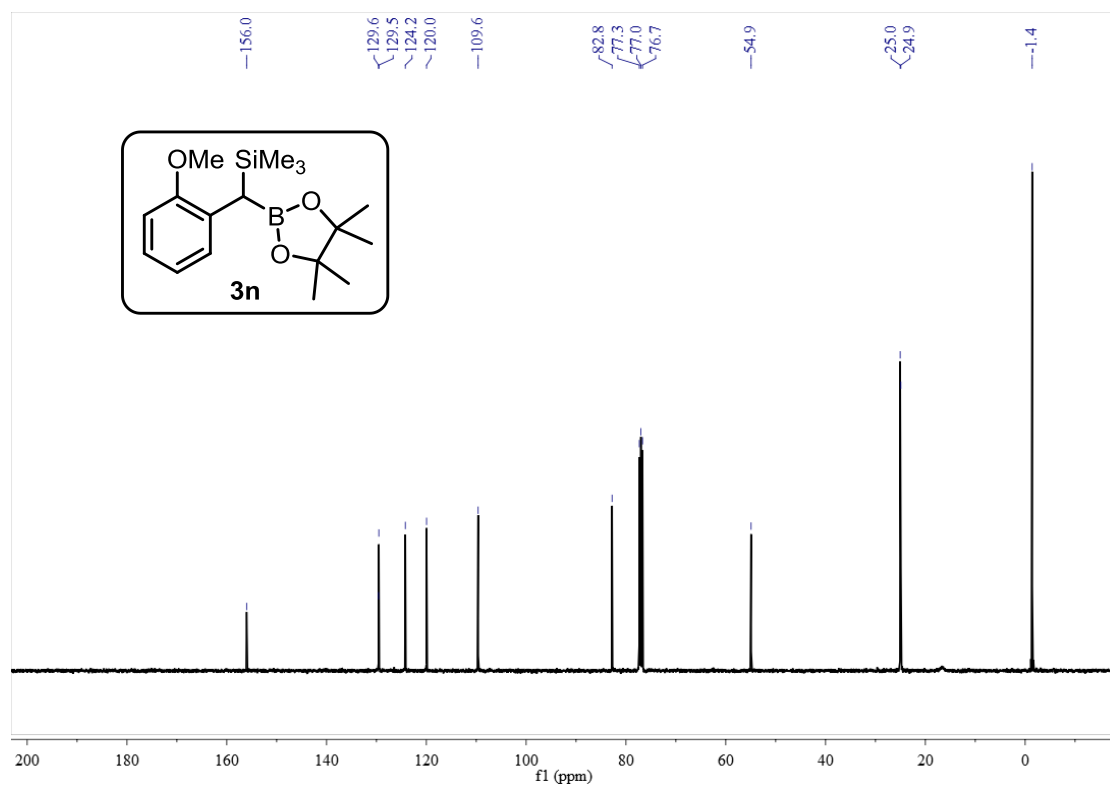

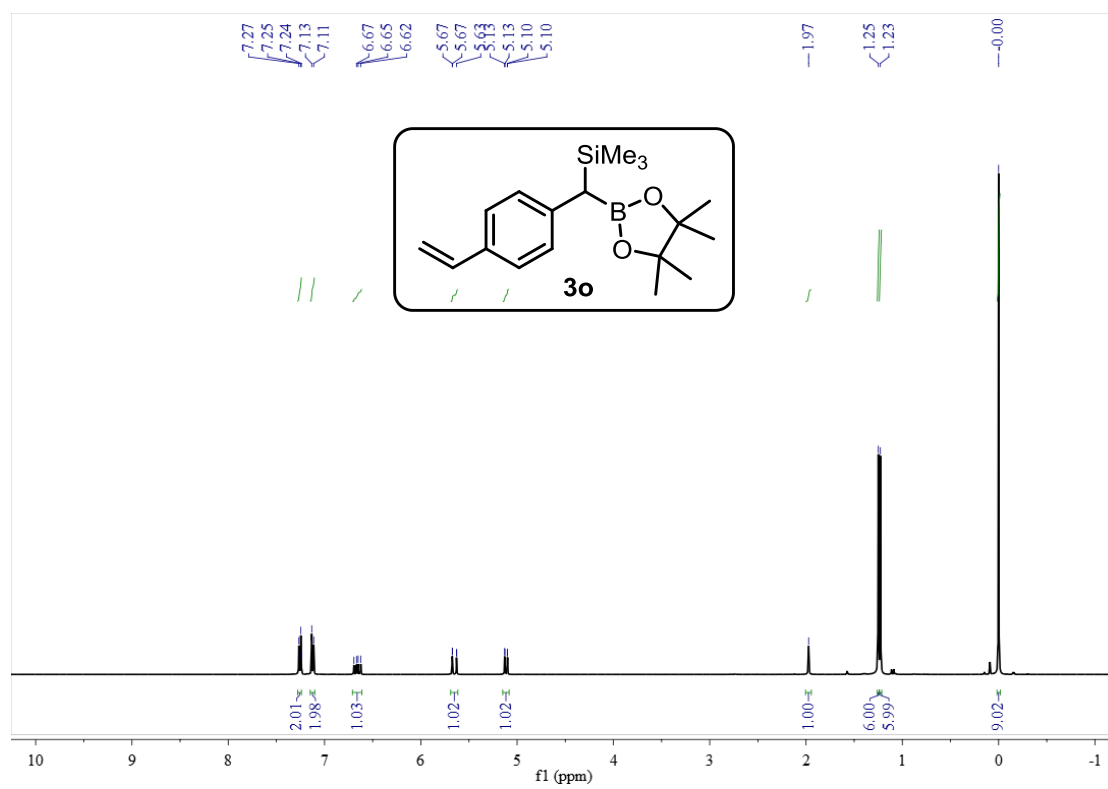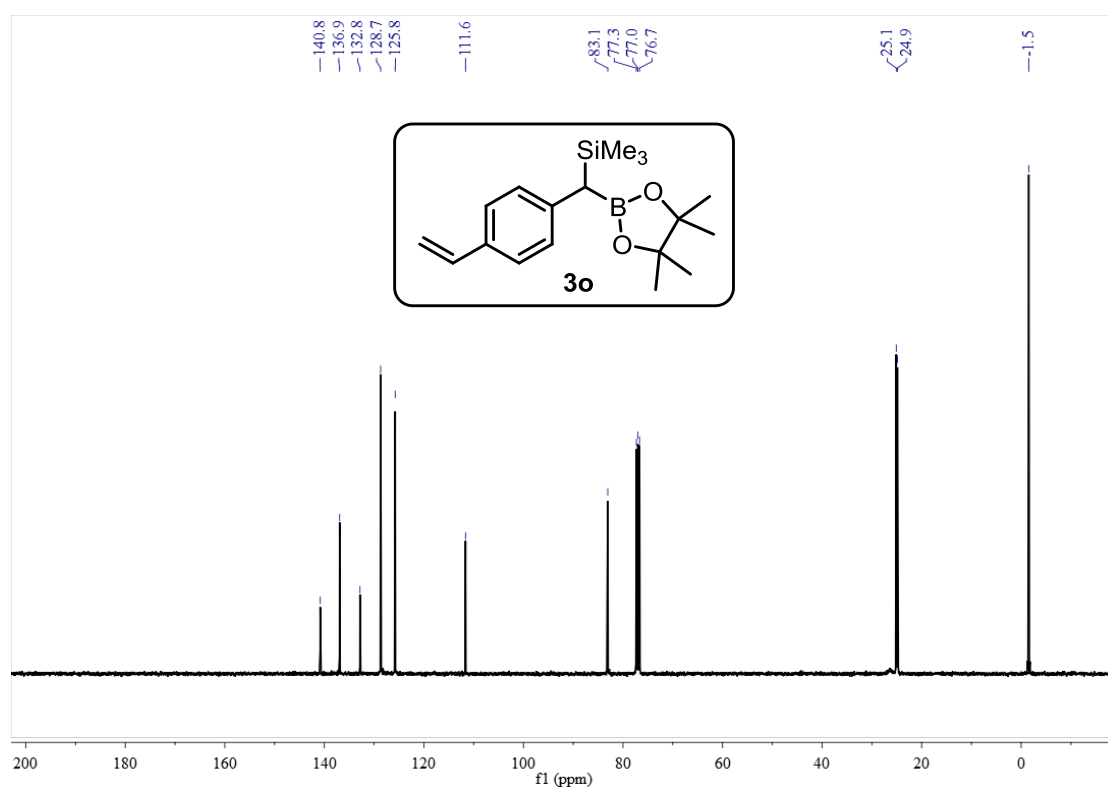



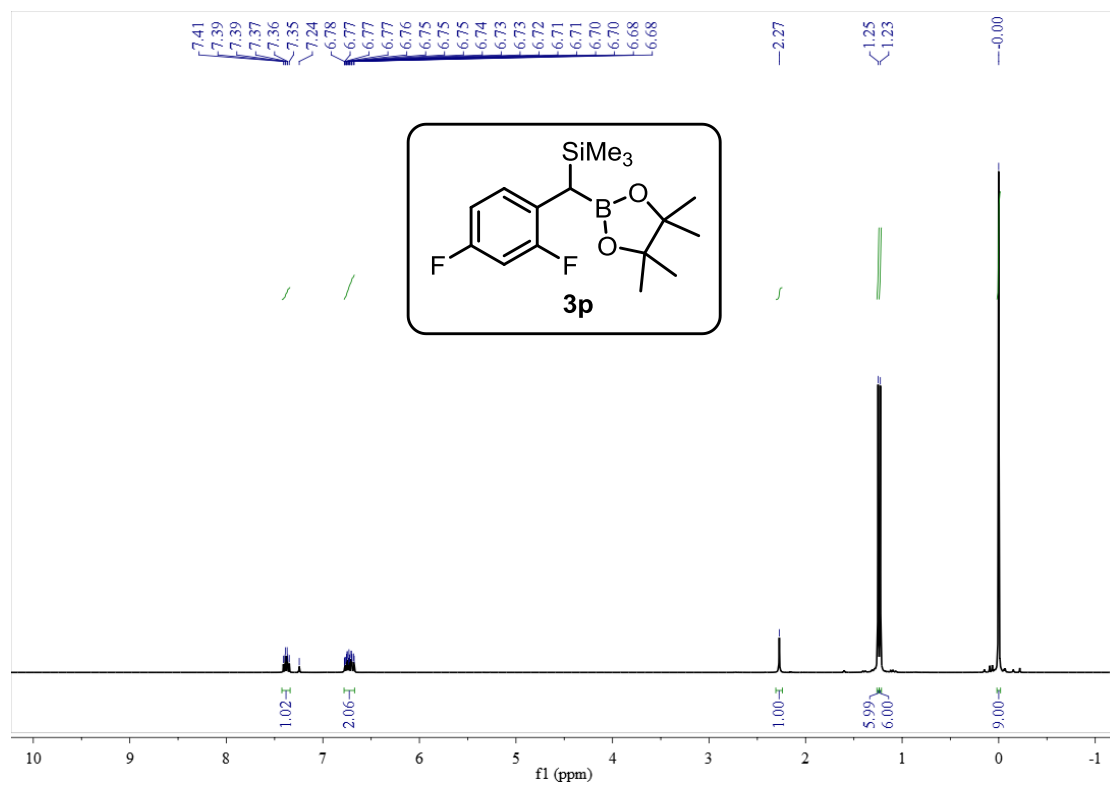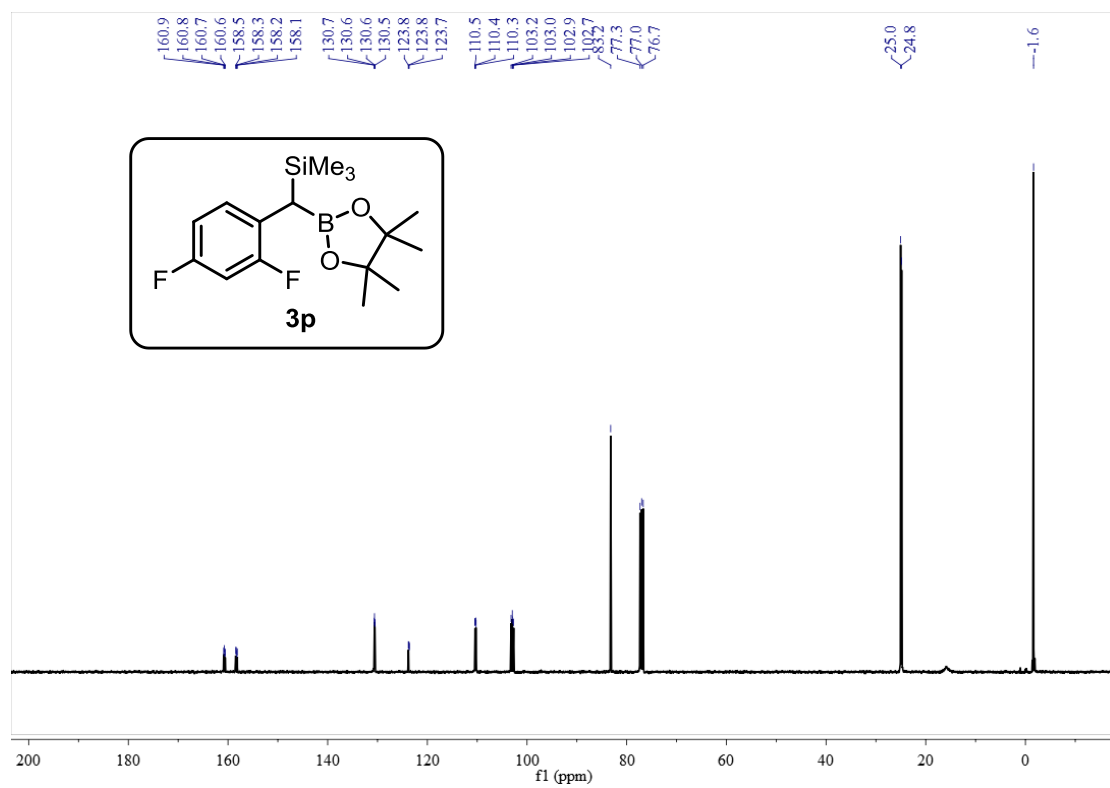

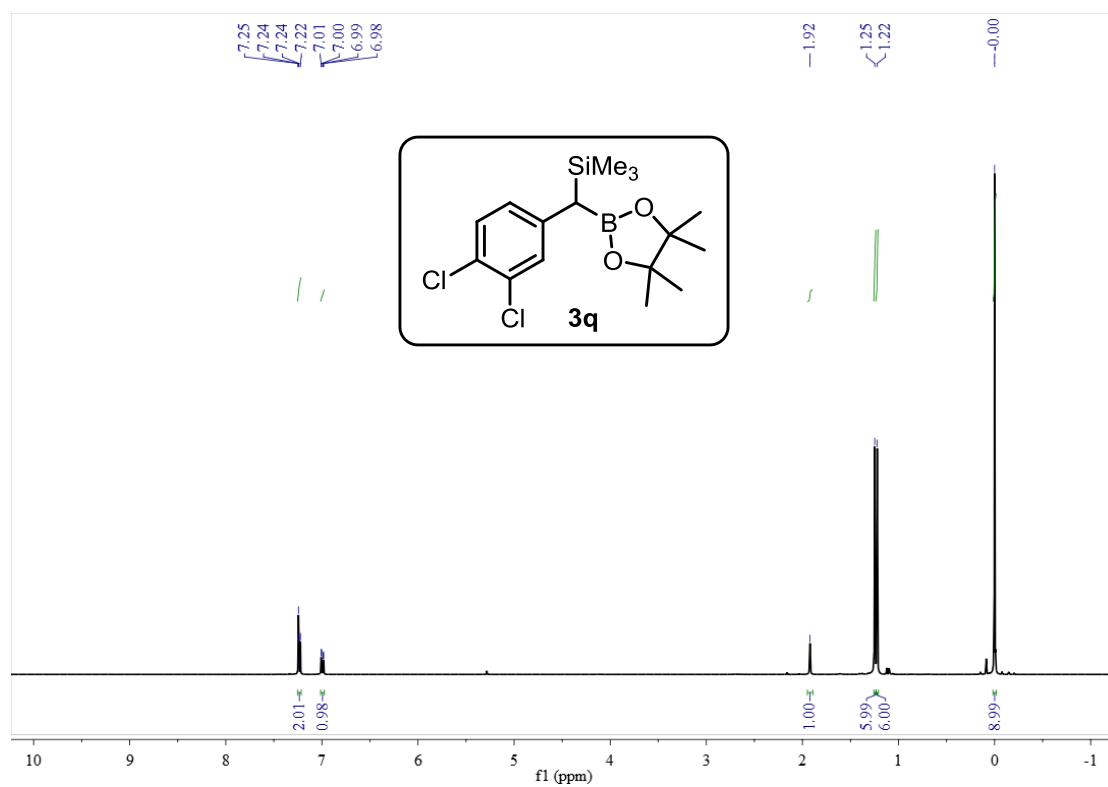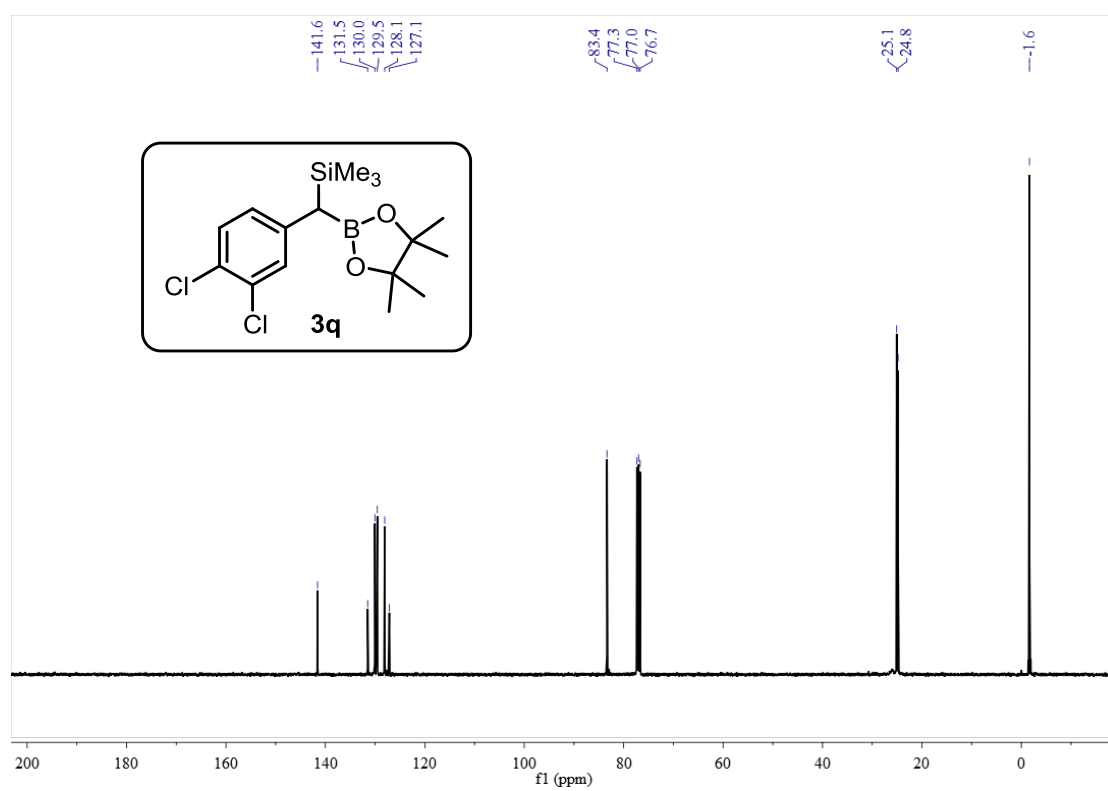

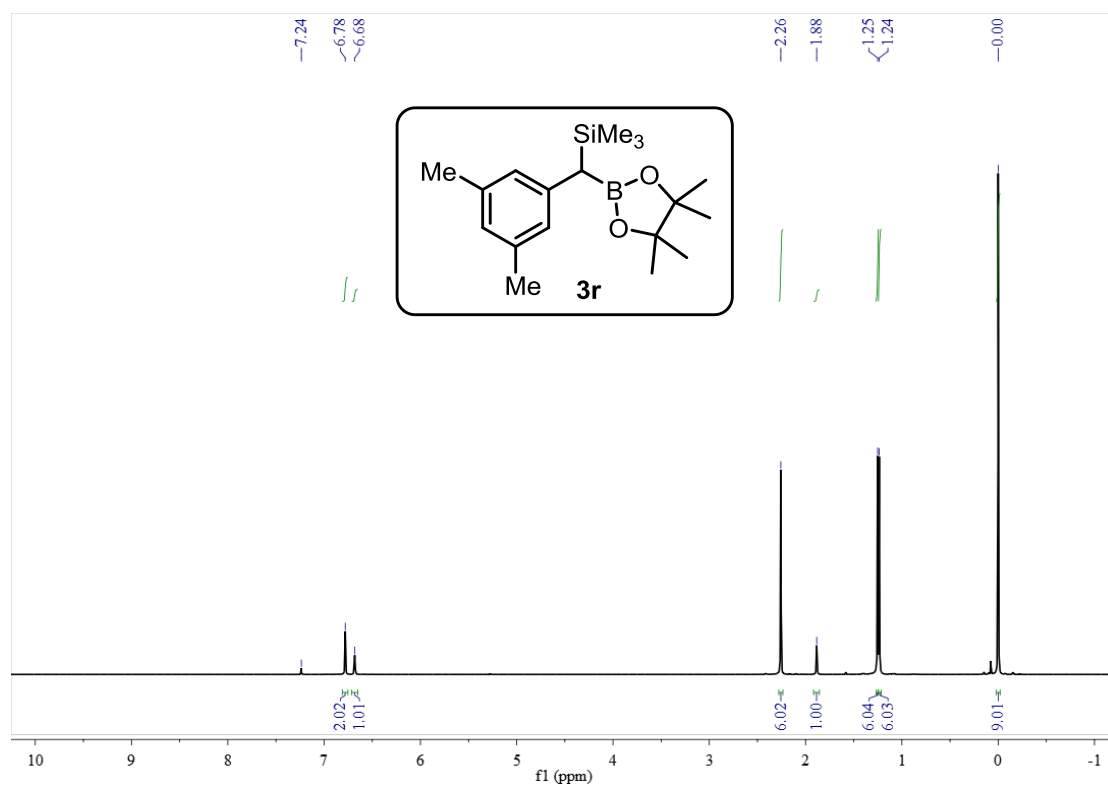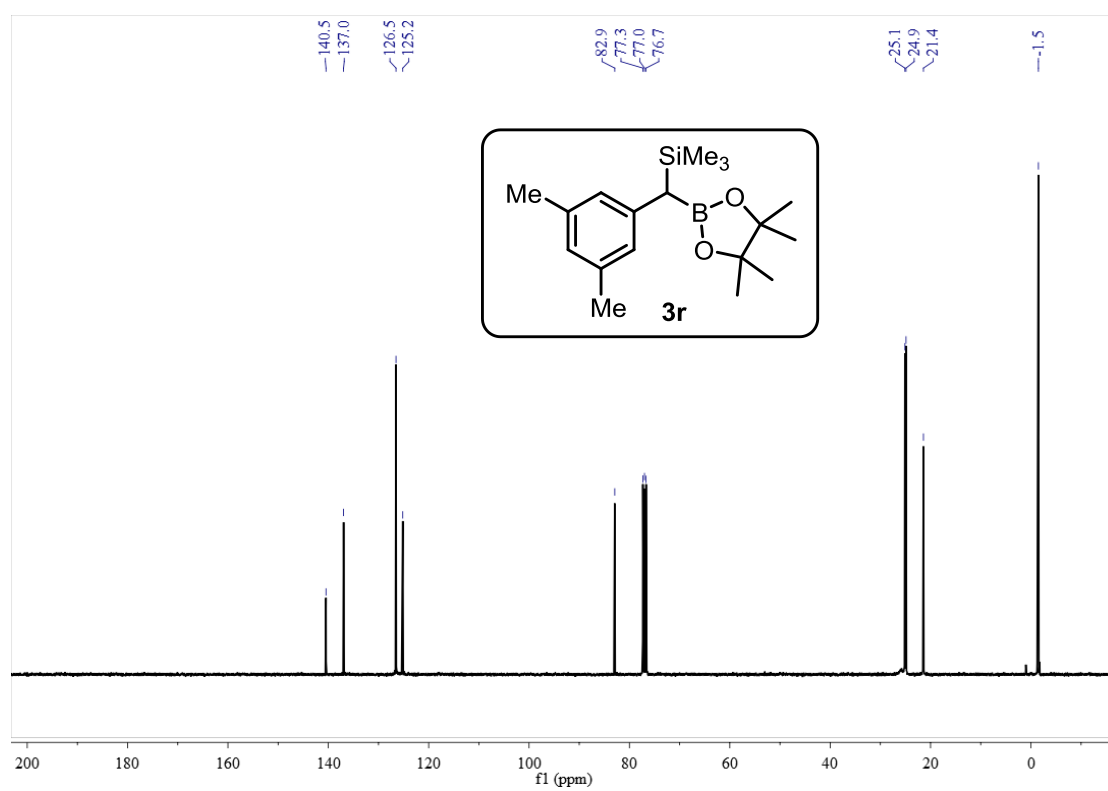

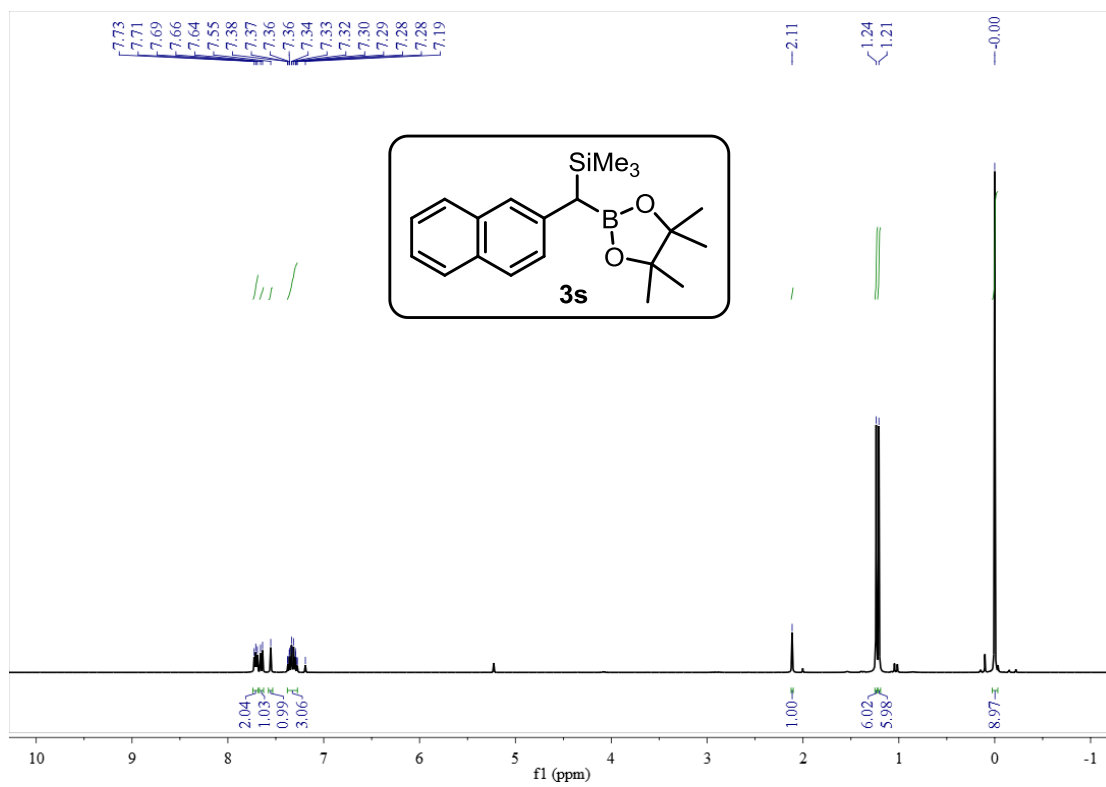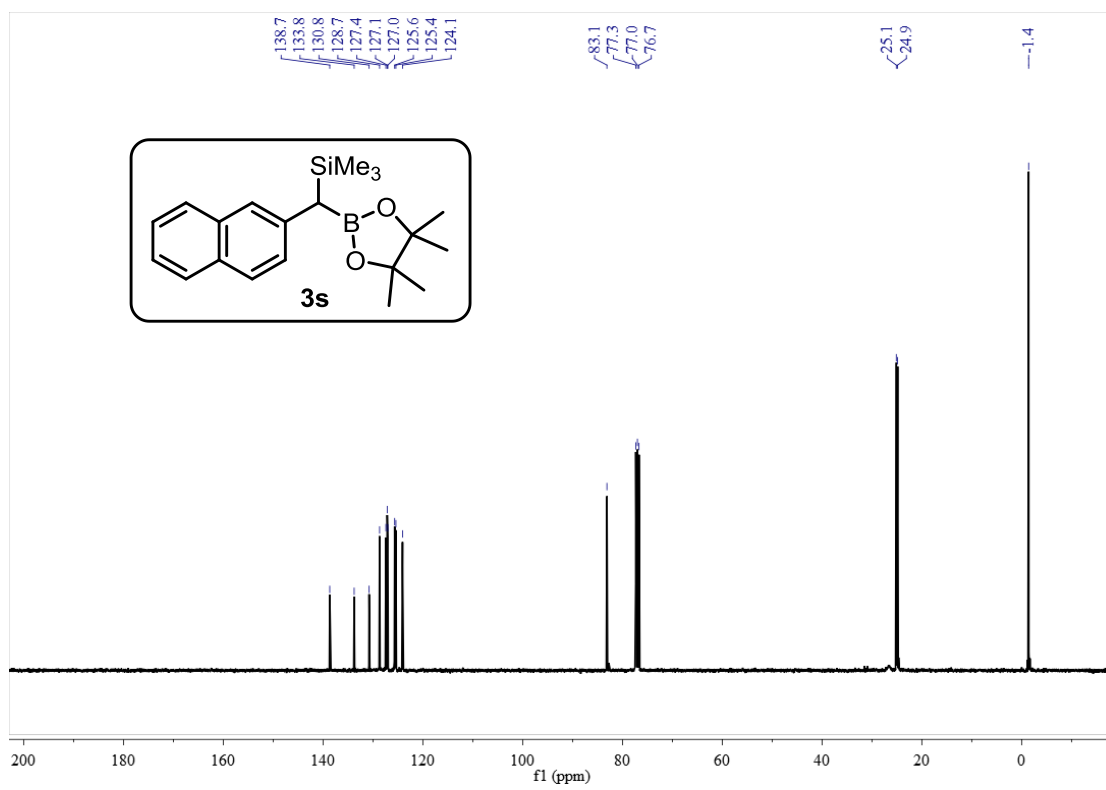

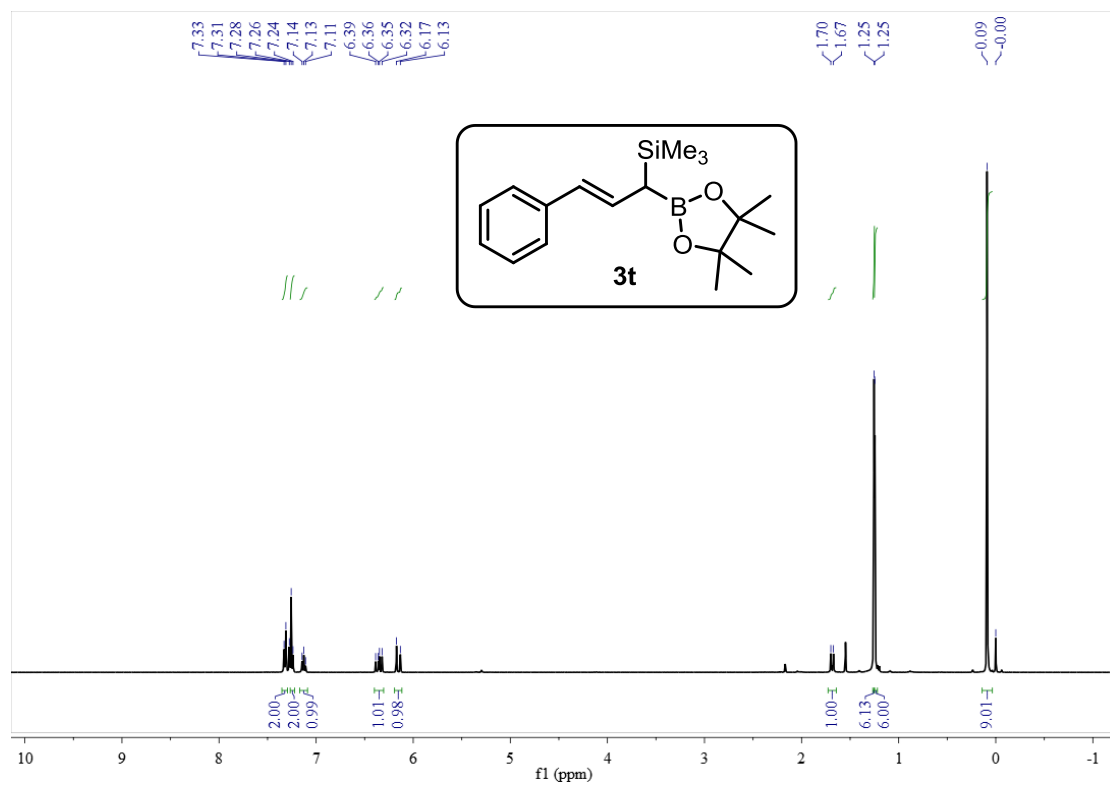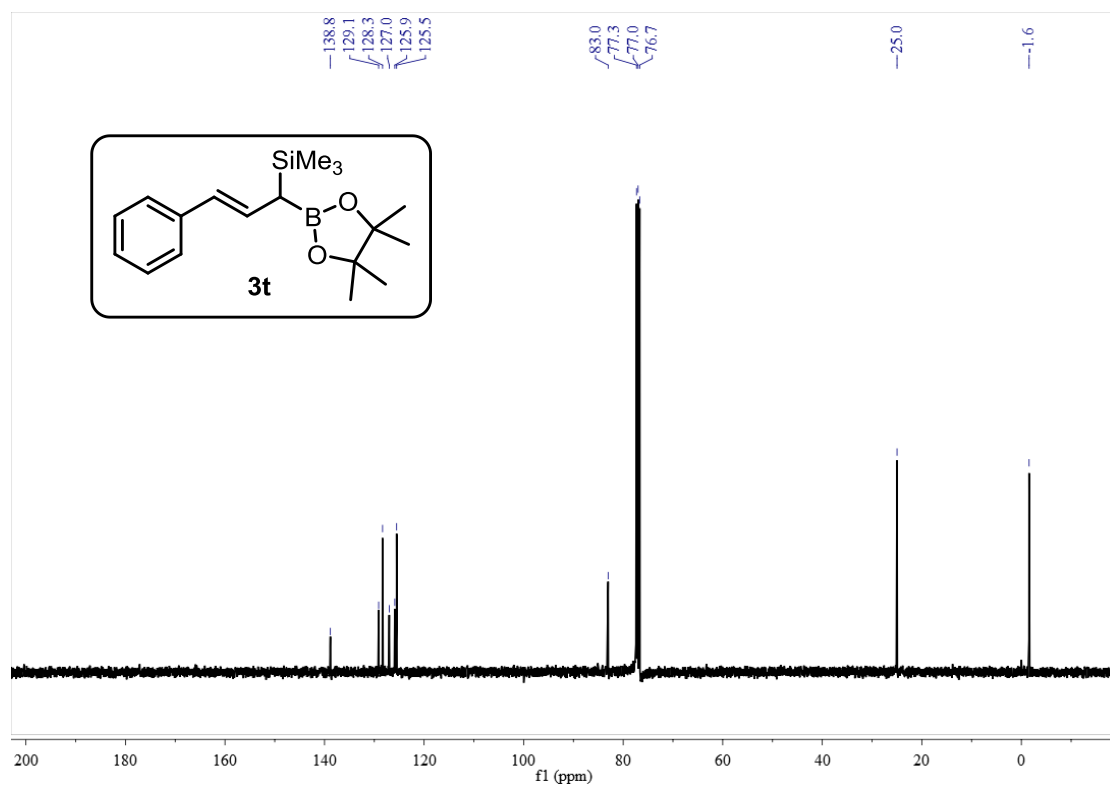

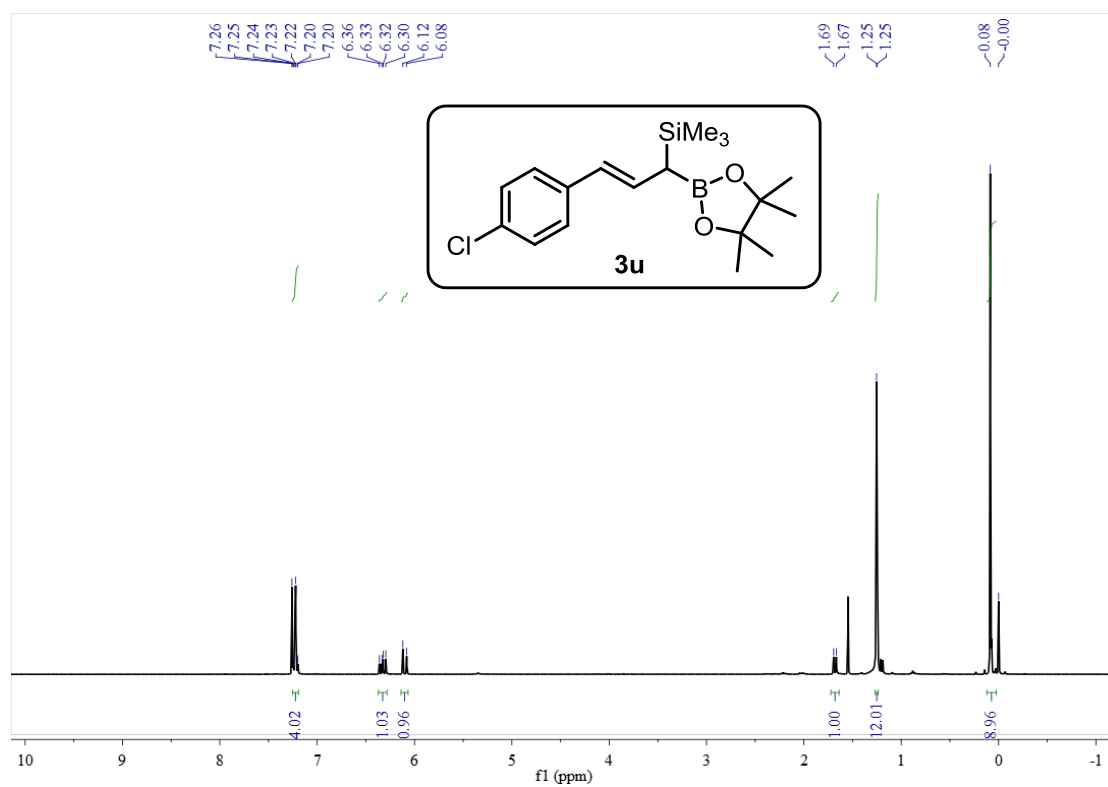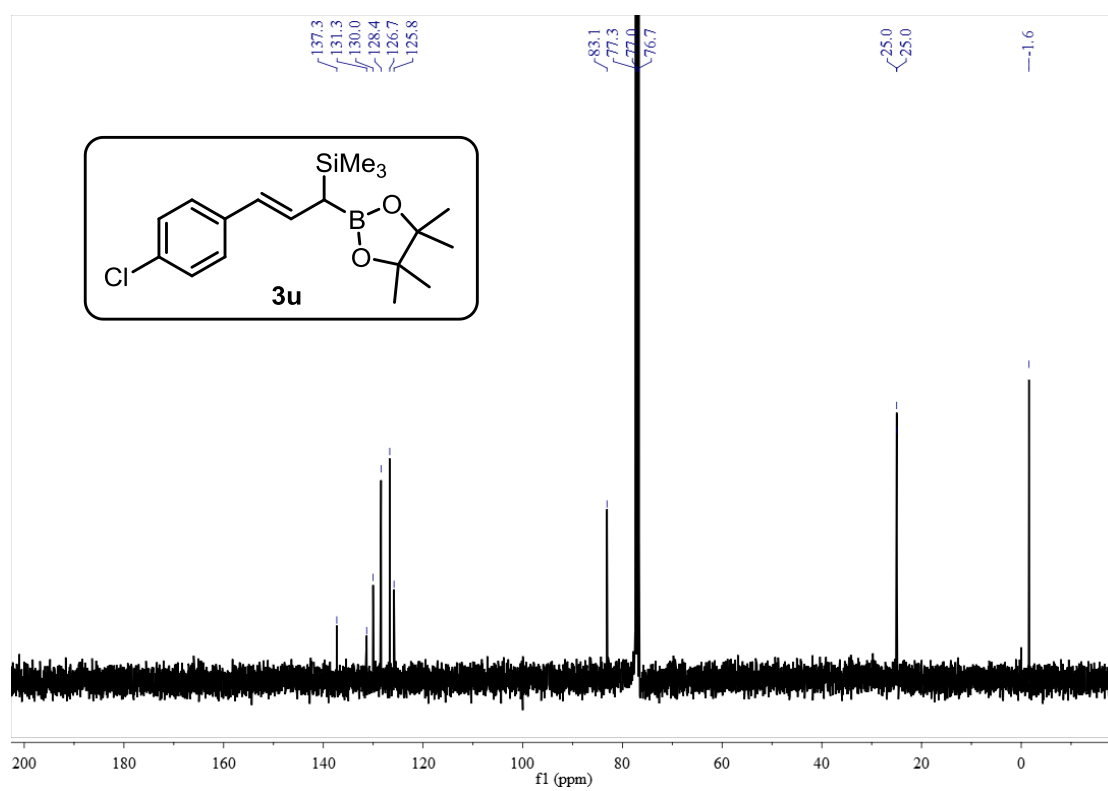

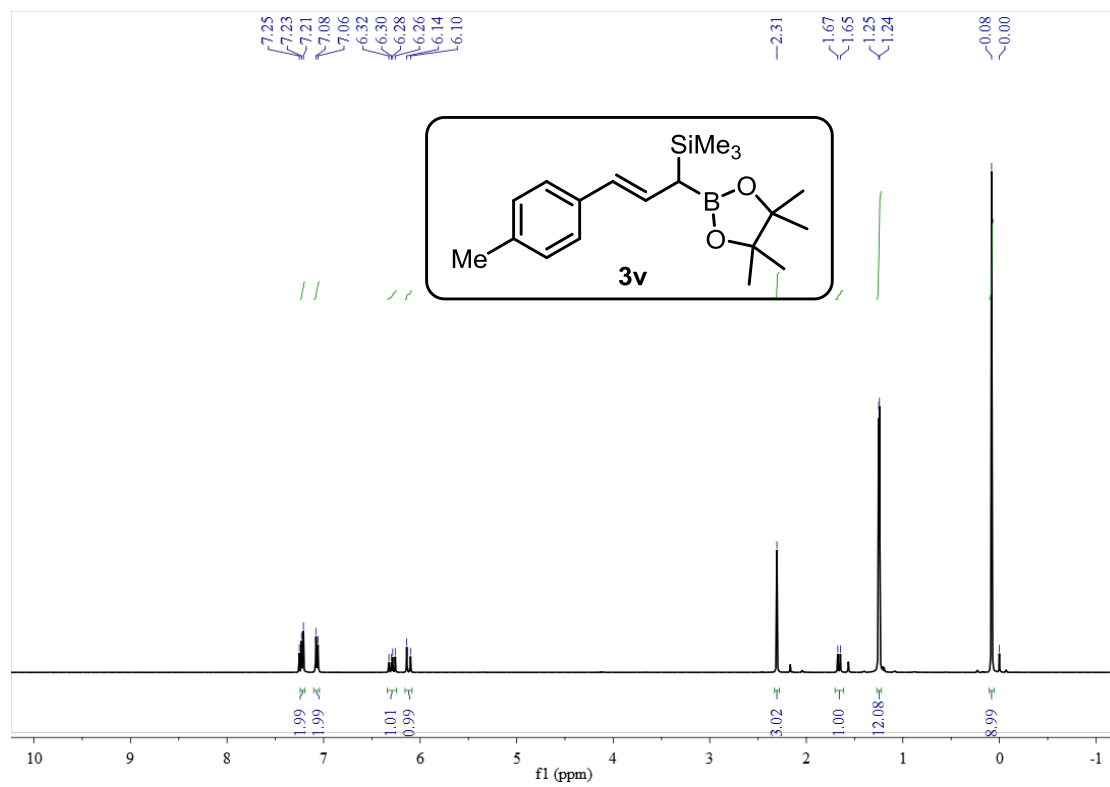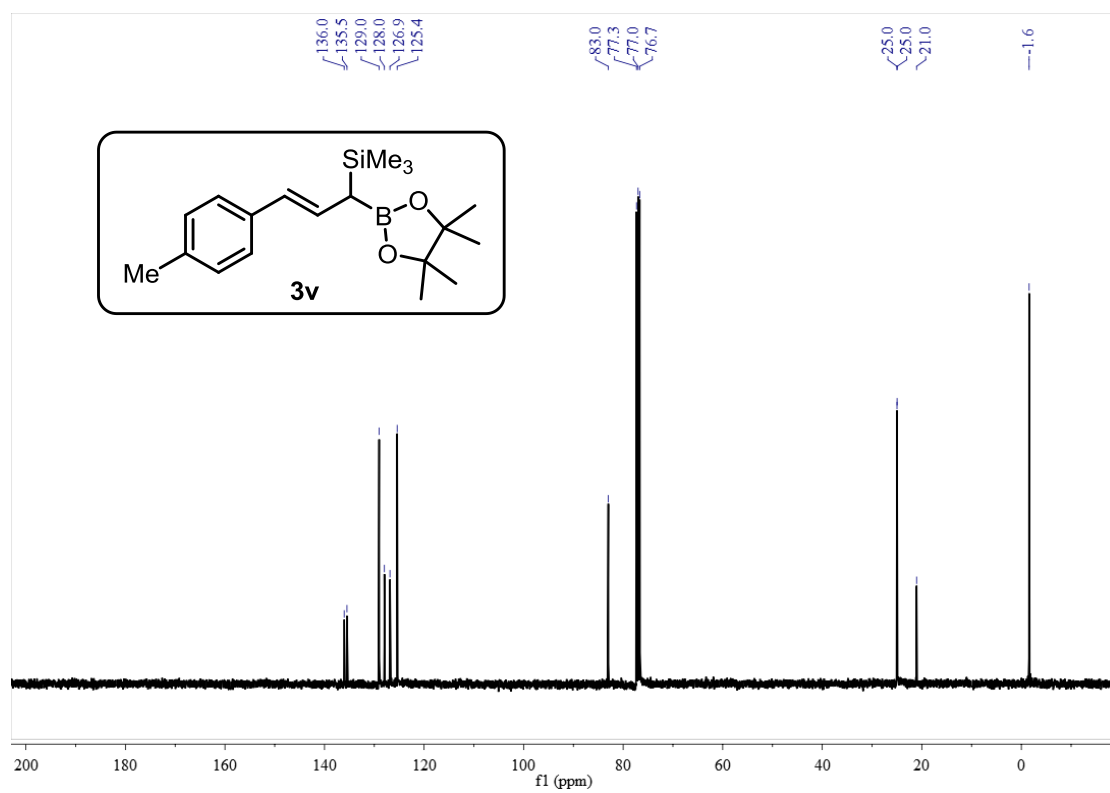

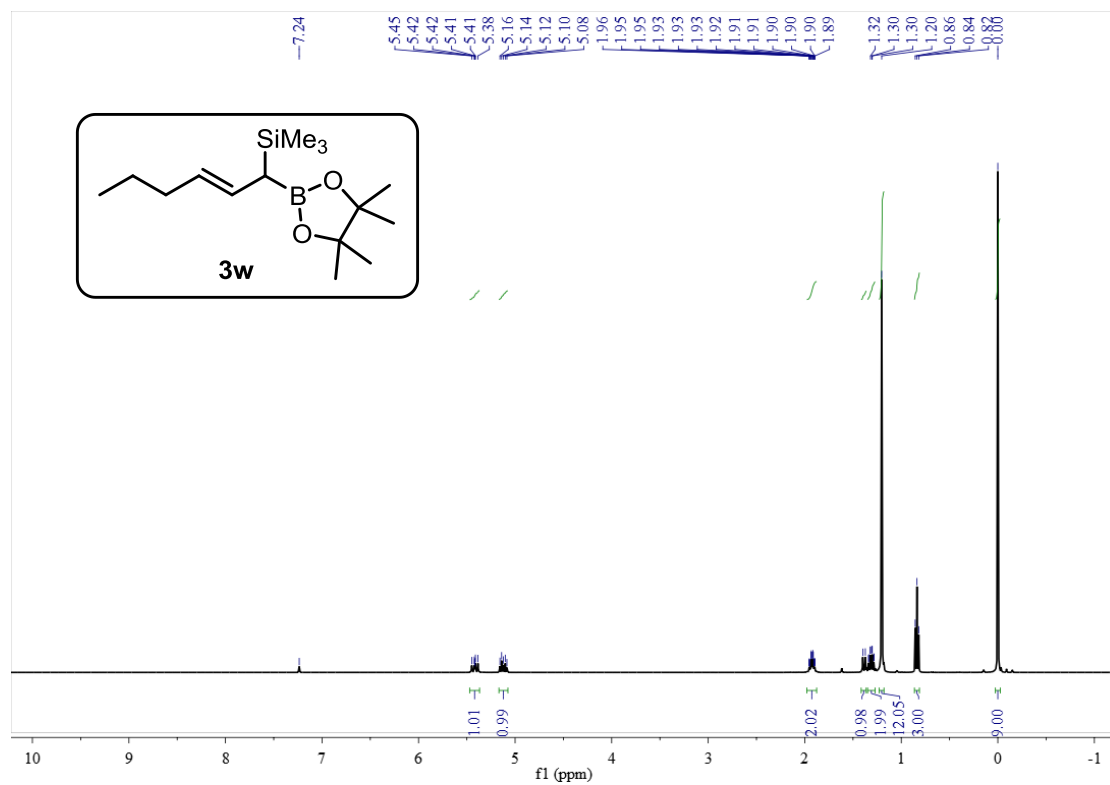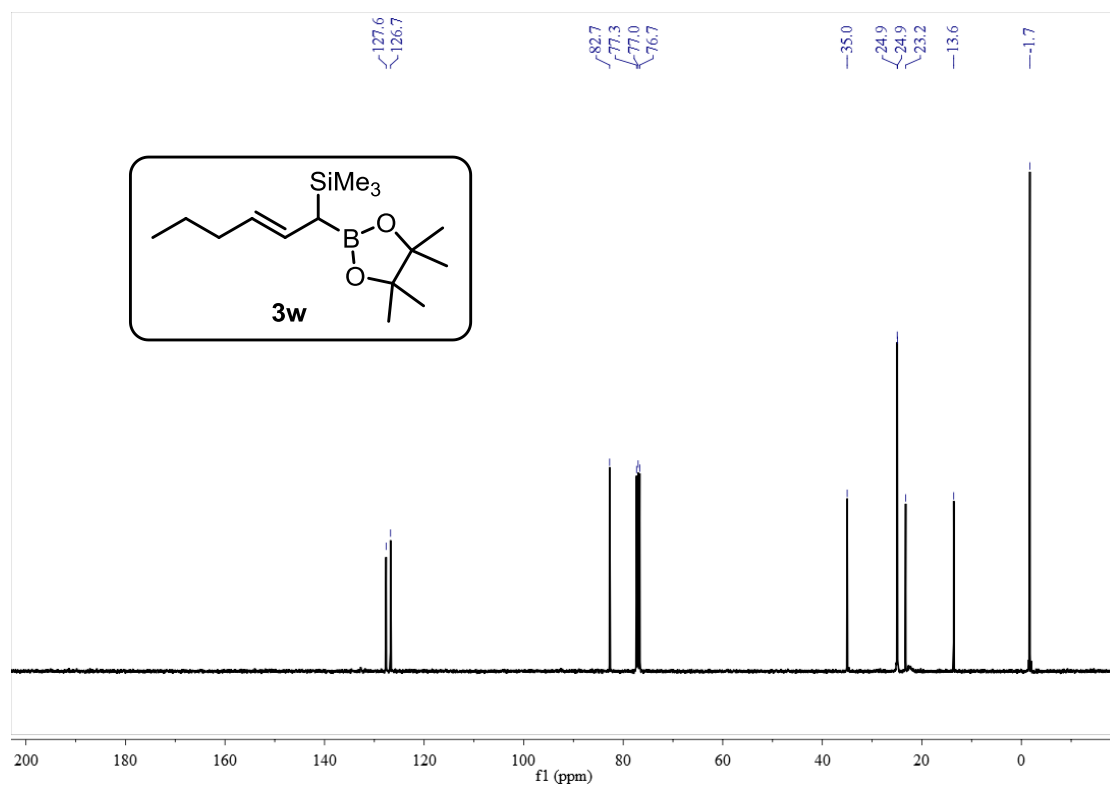



## 2. $^1\text{H}$ and $^{13}\text{C}$ NMR spectra of **5a-u**

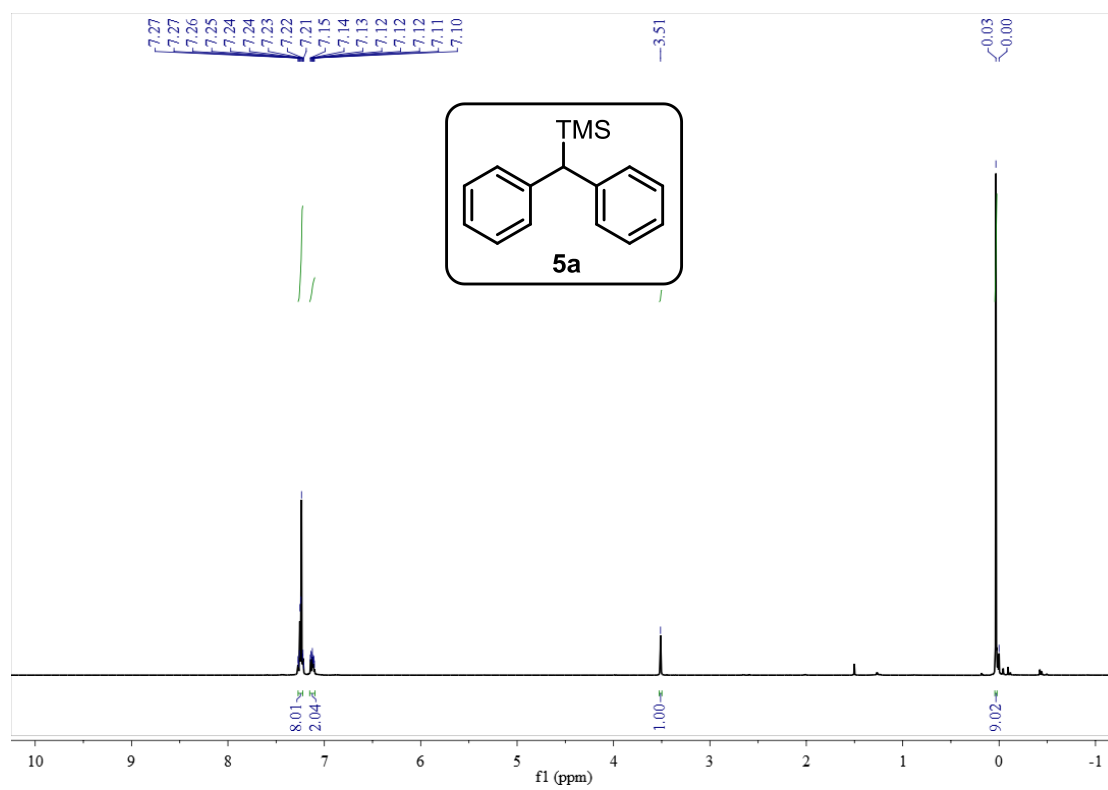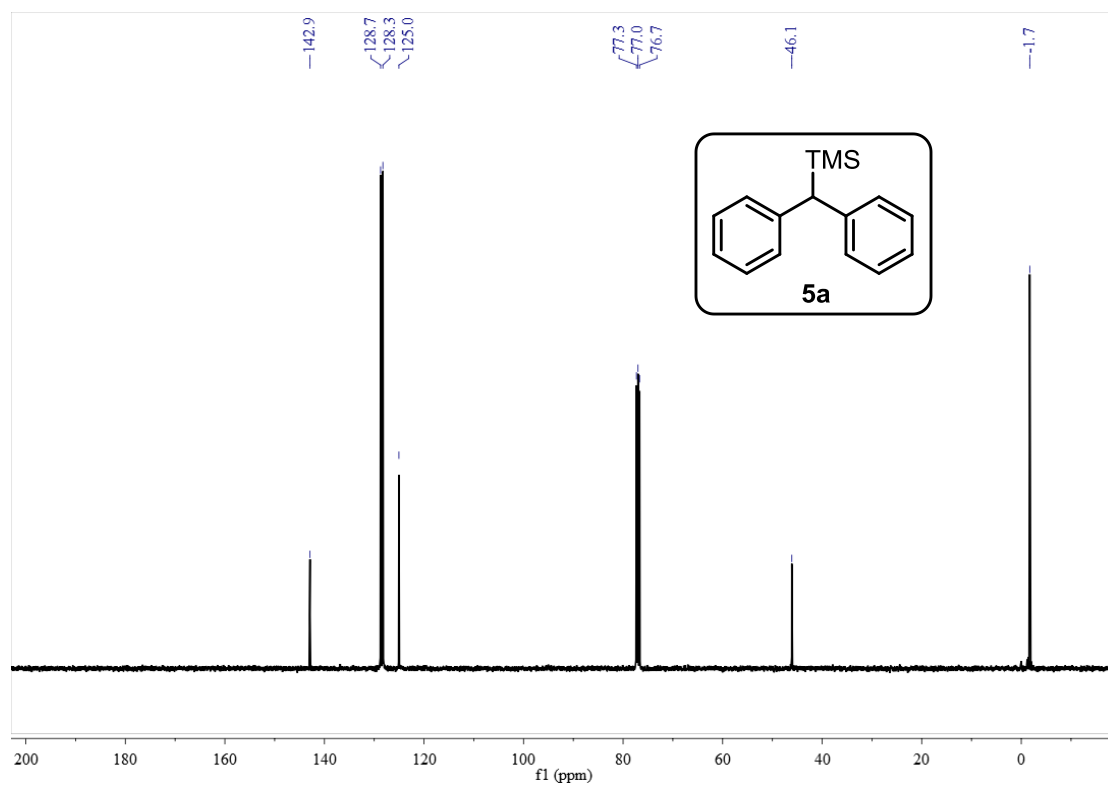

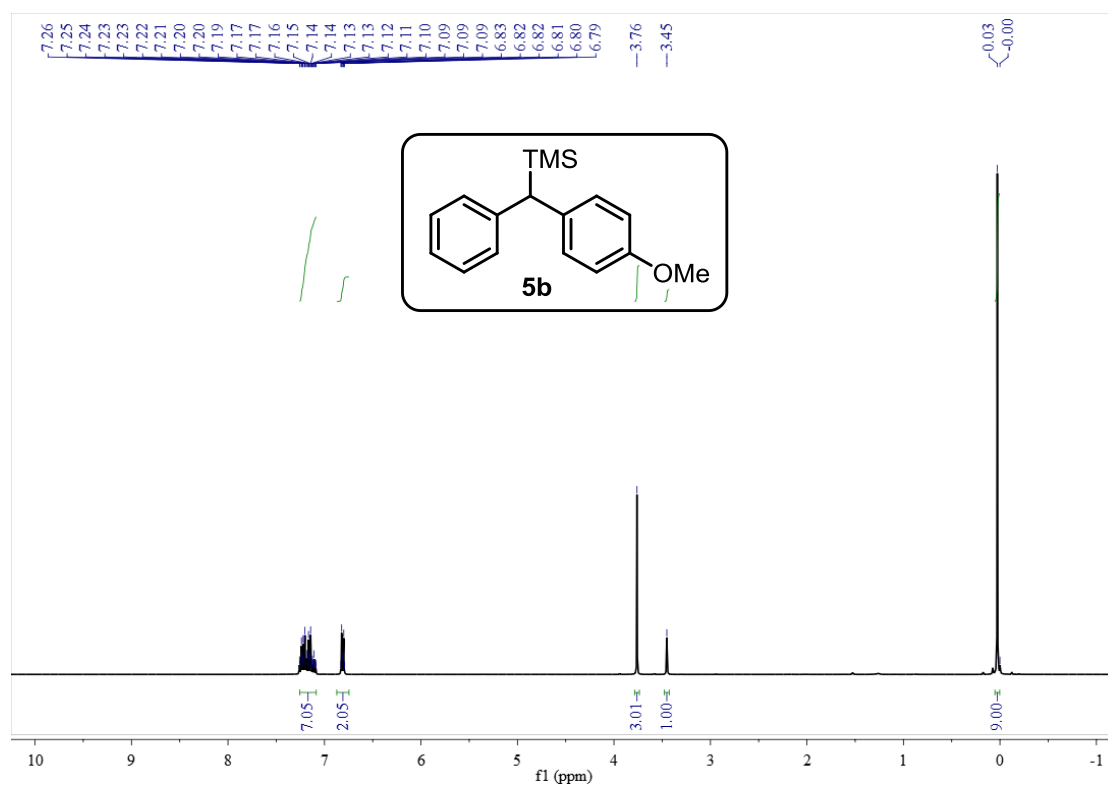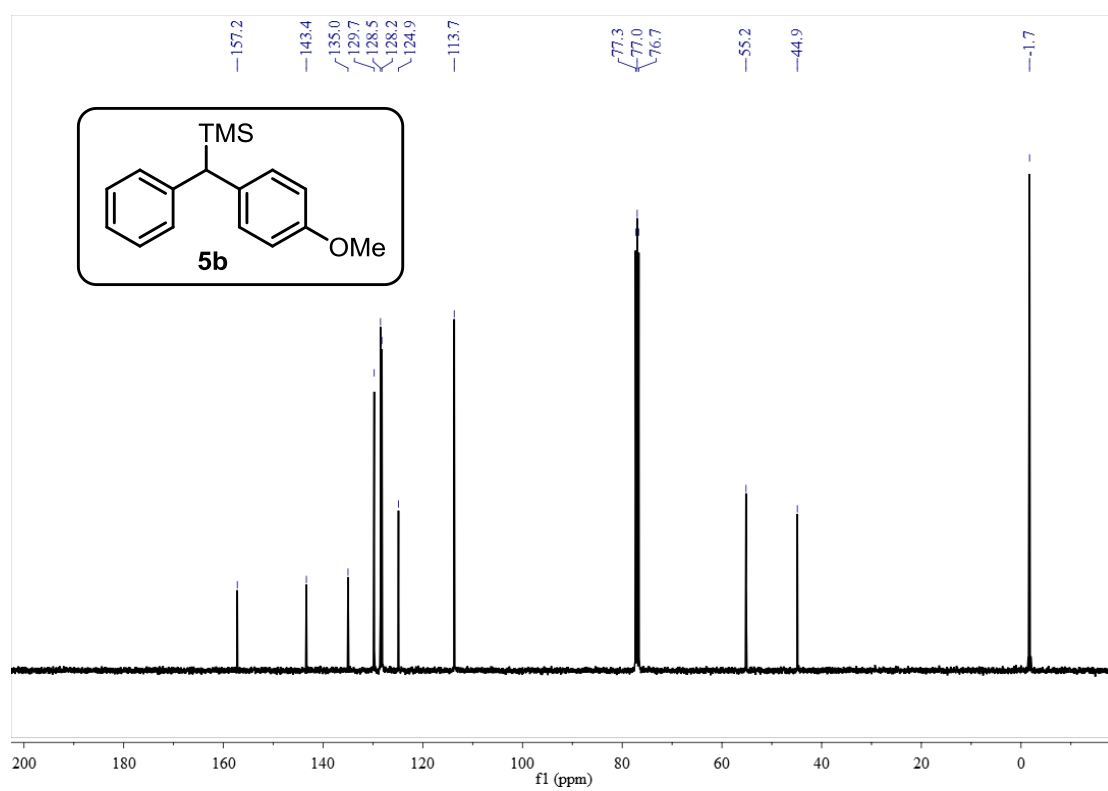

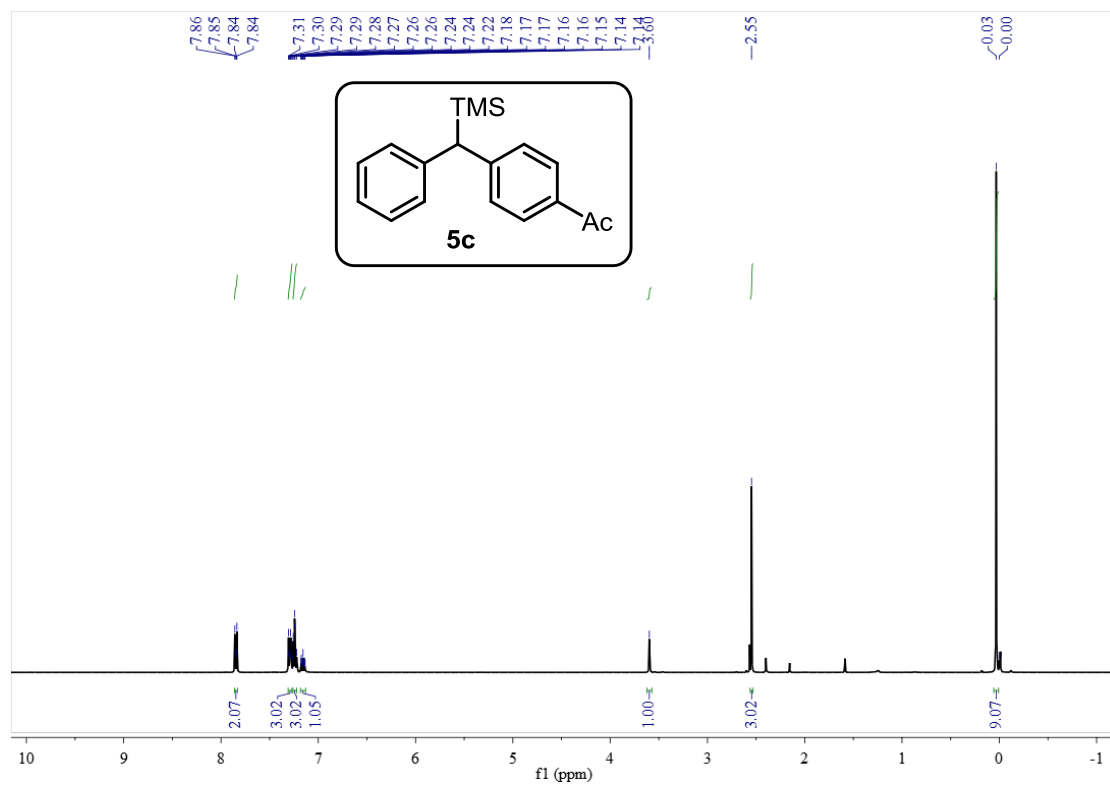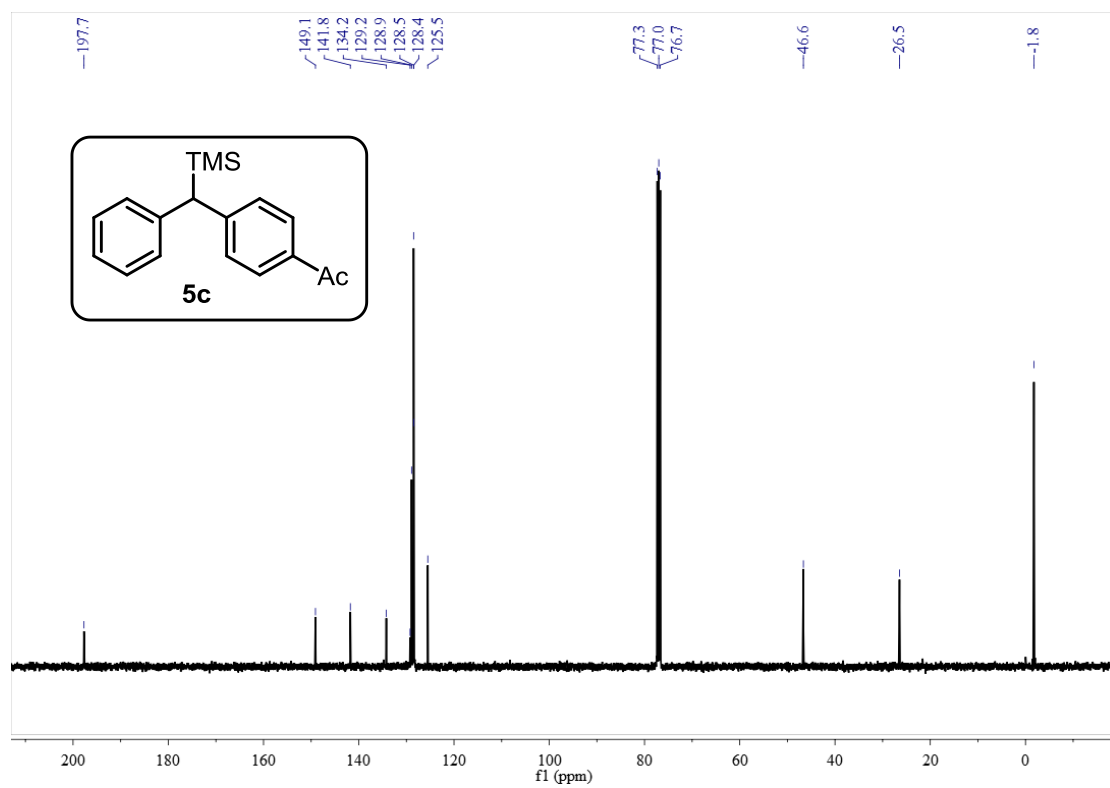

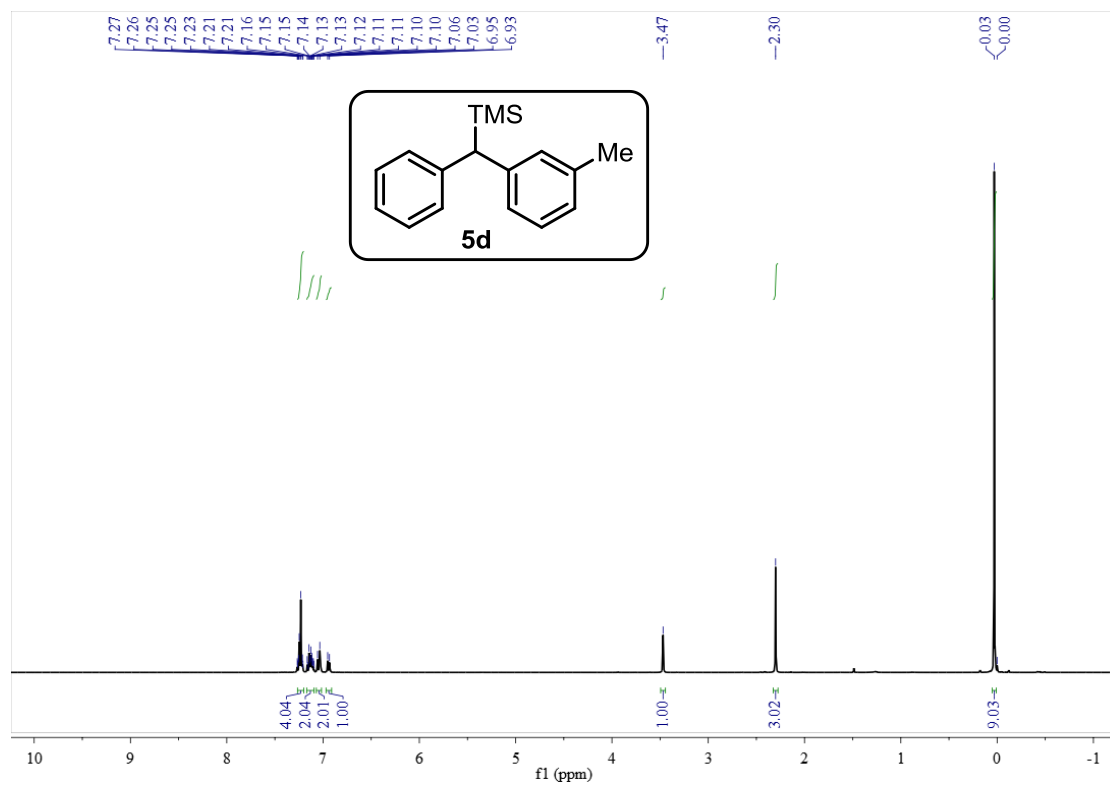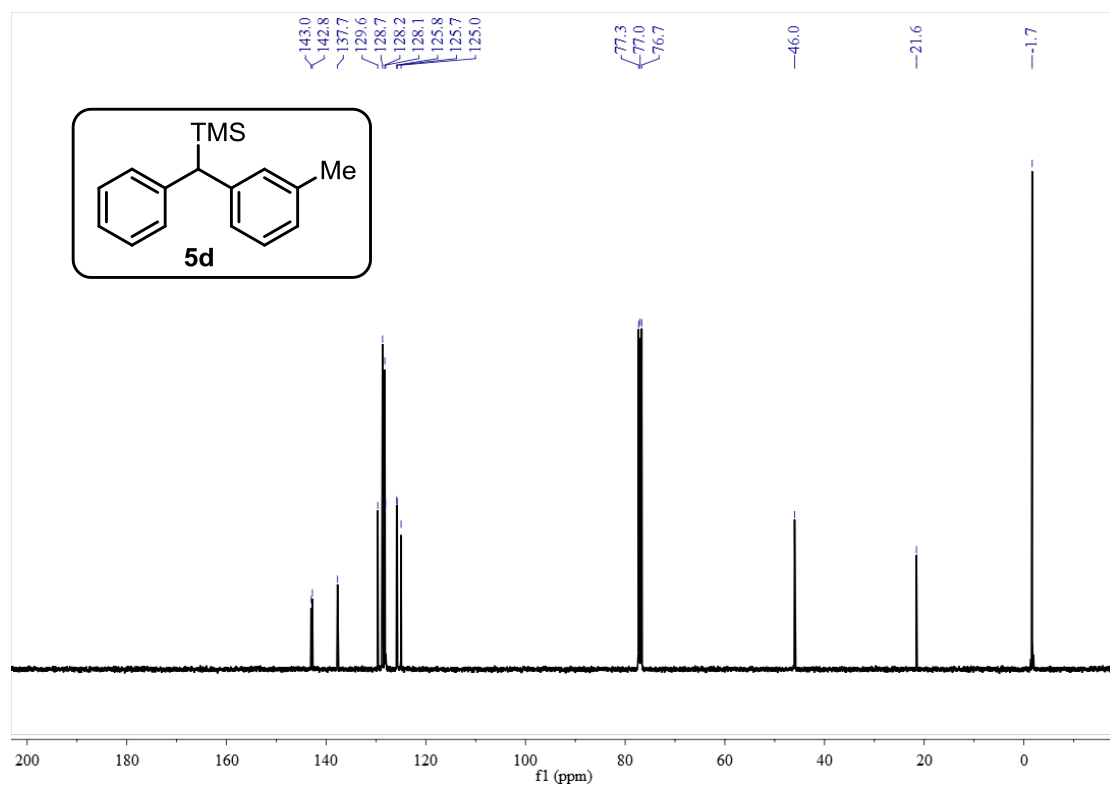

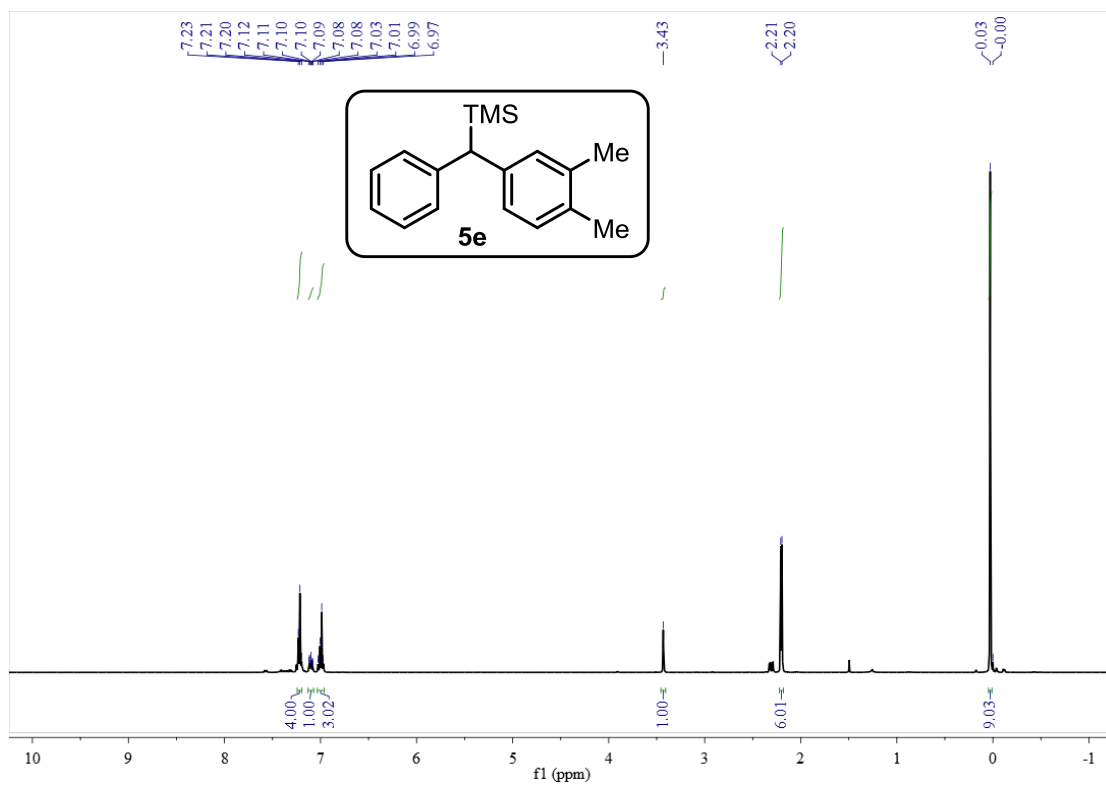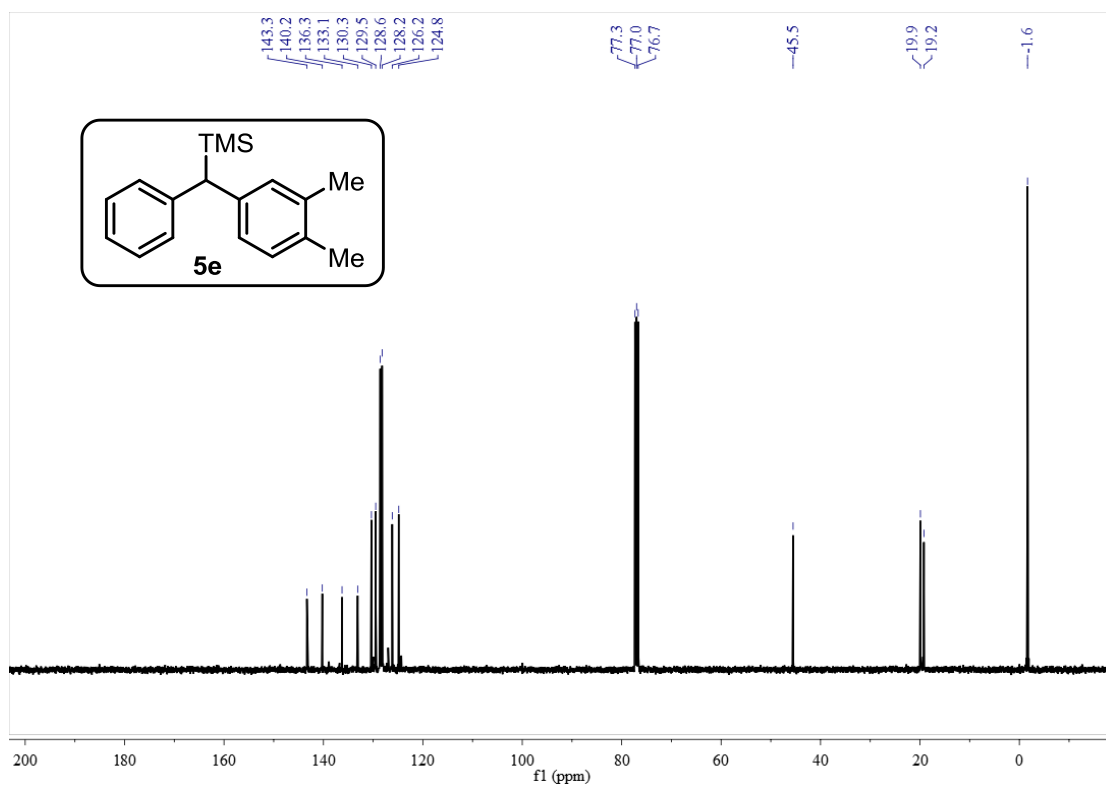

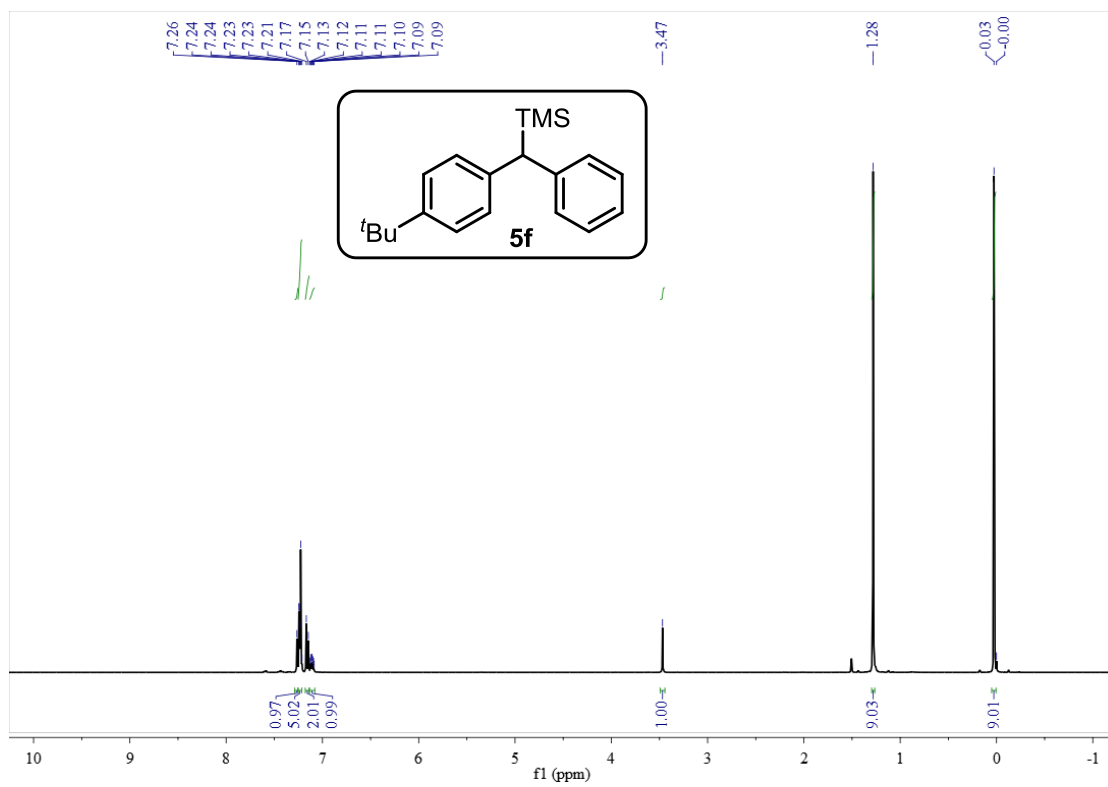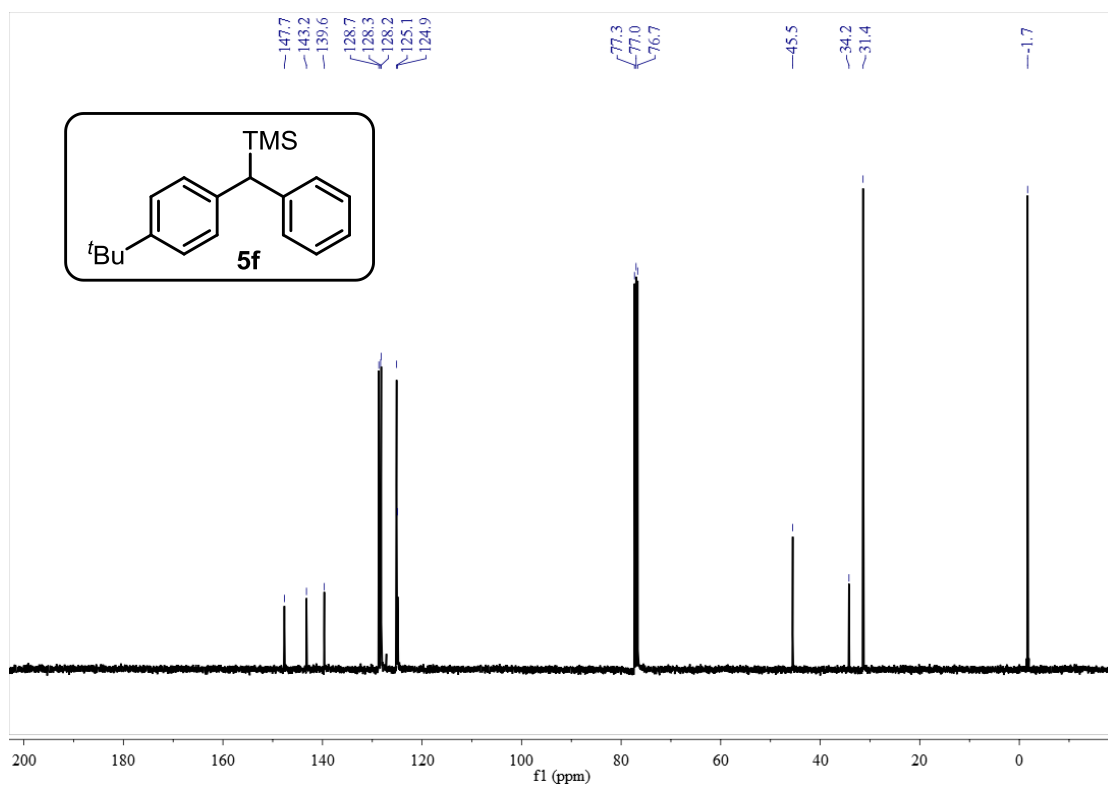

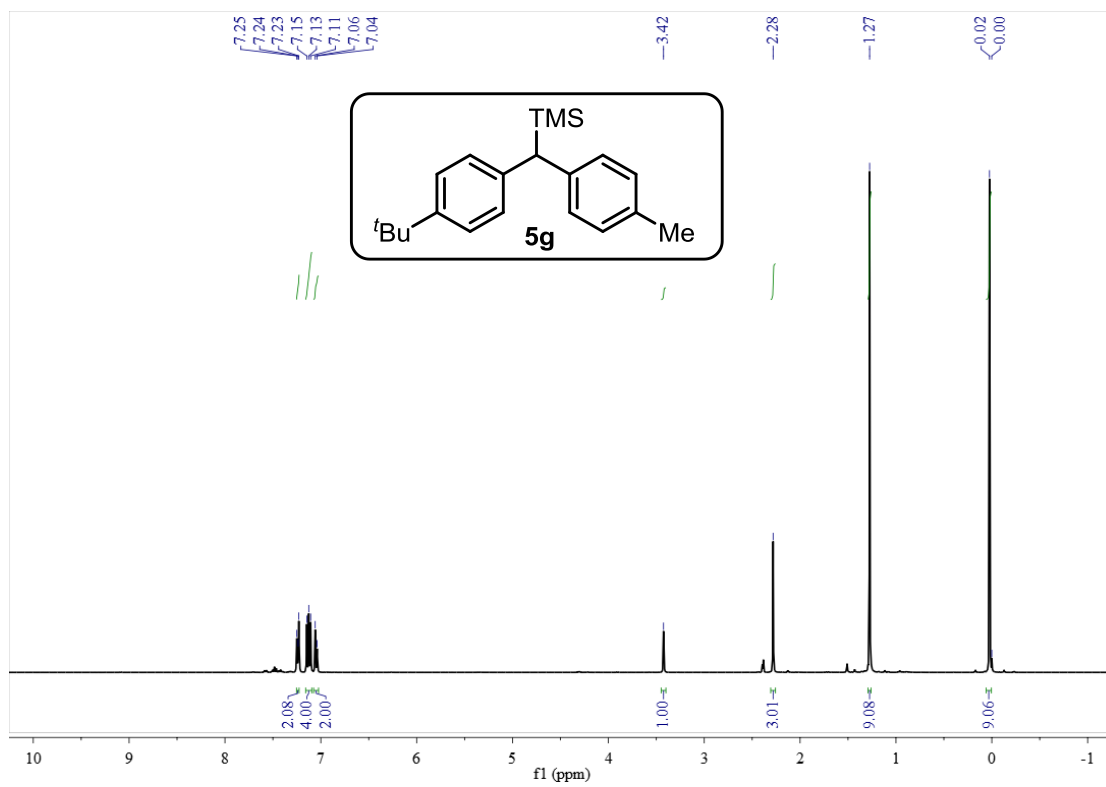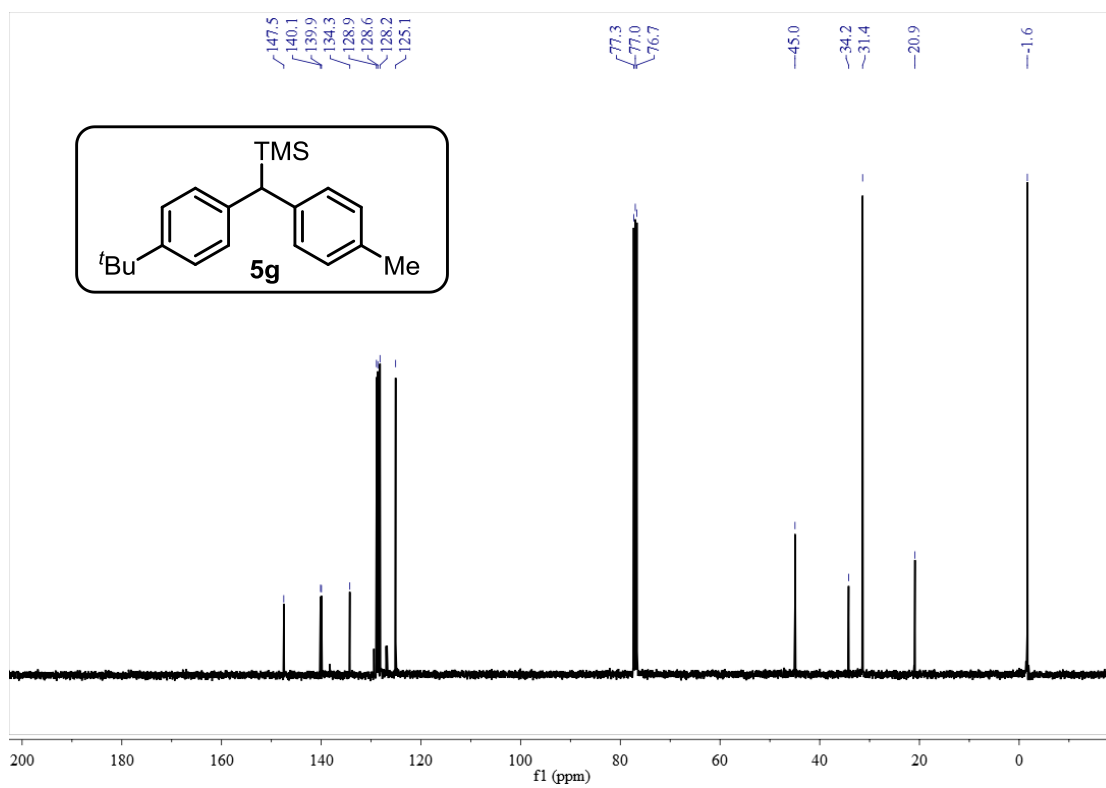

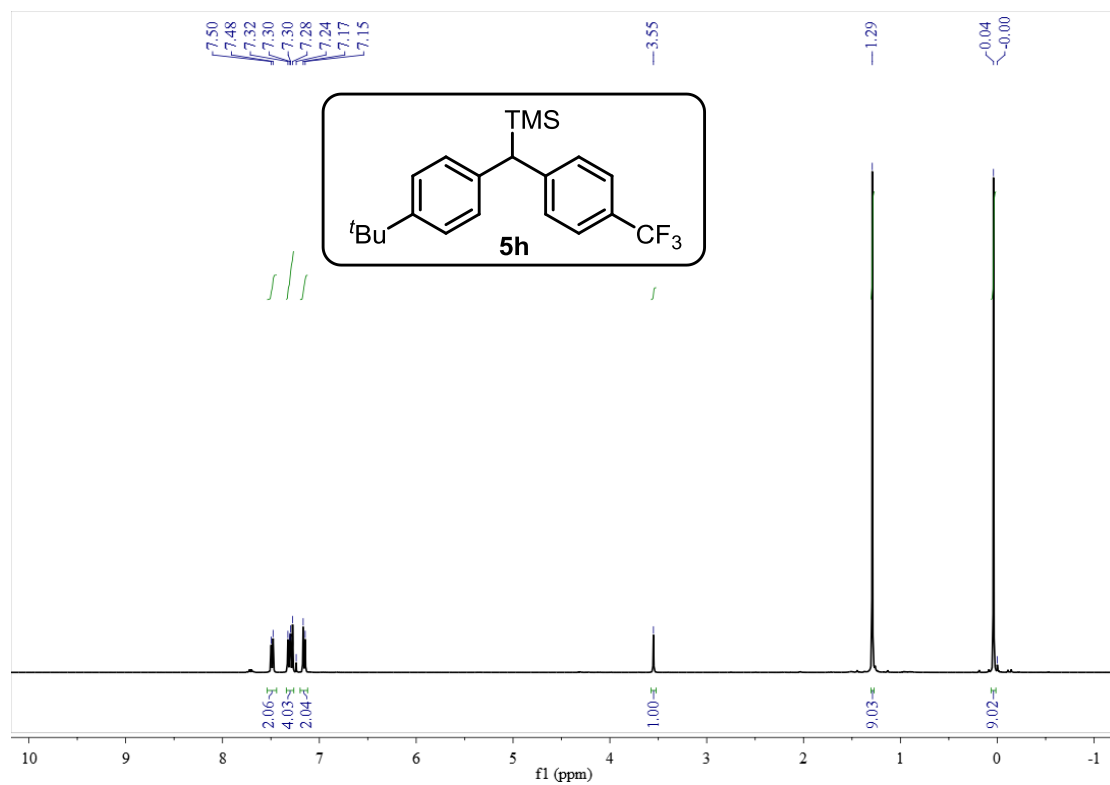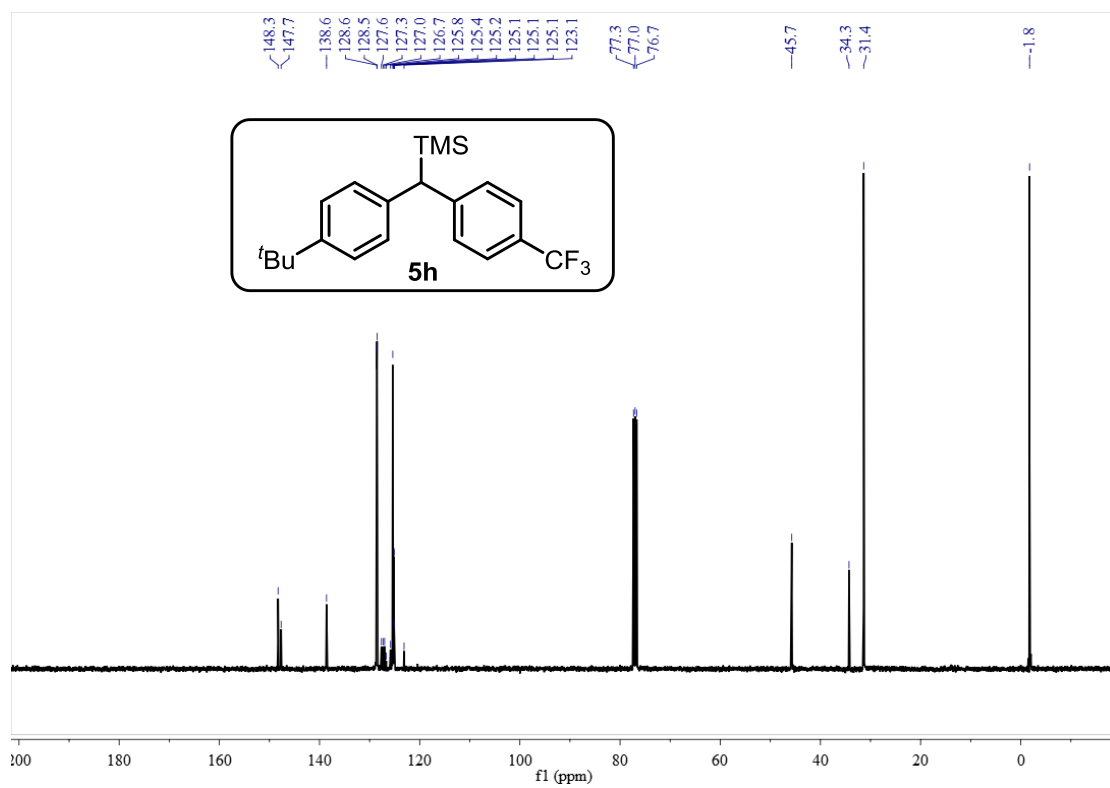



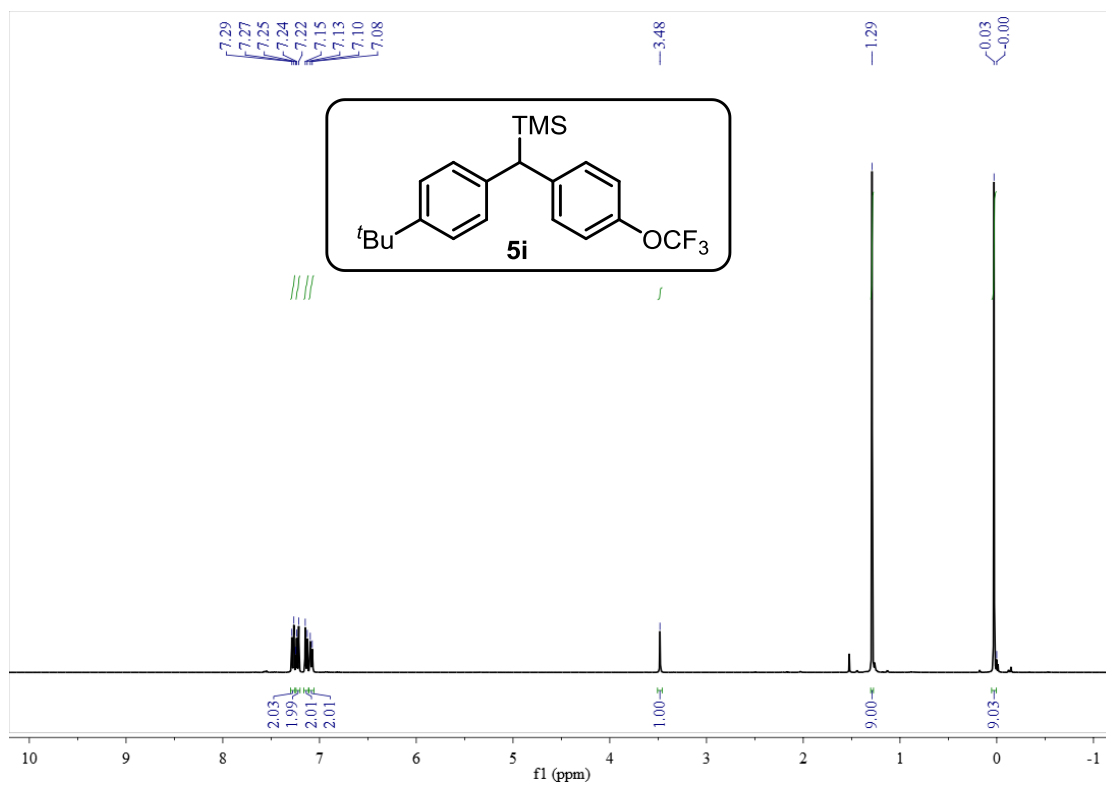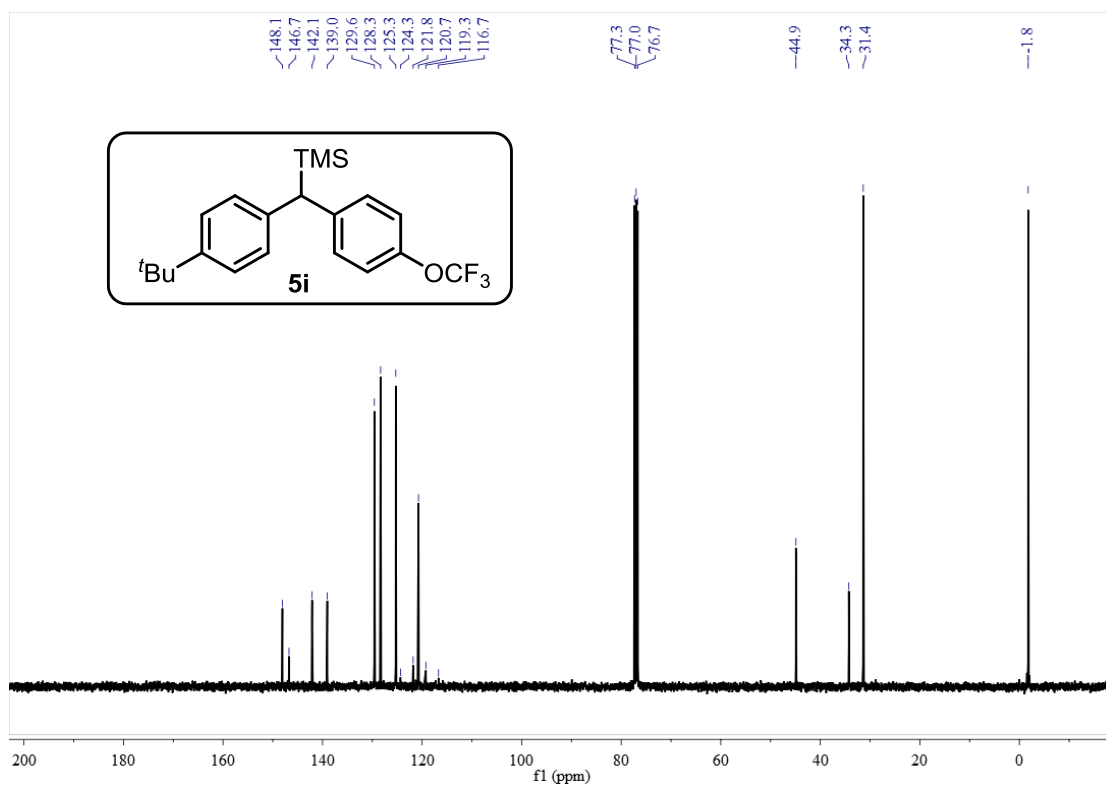

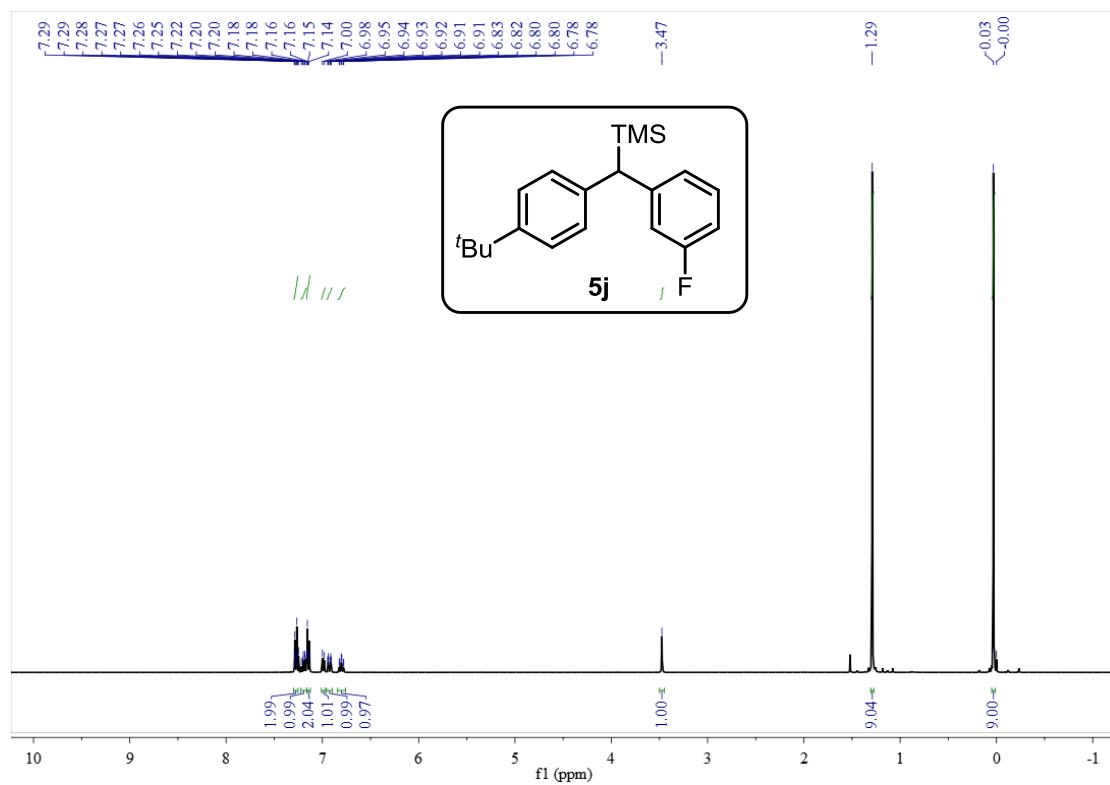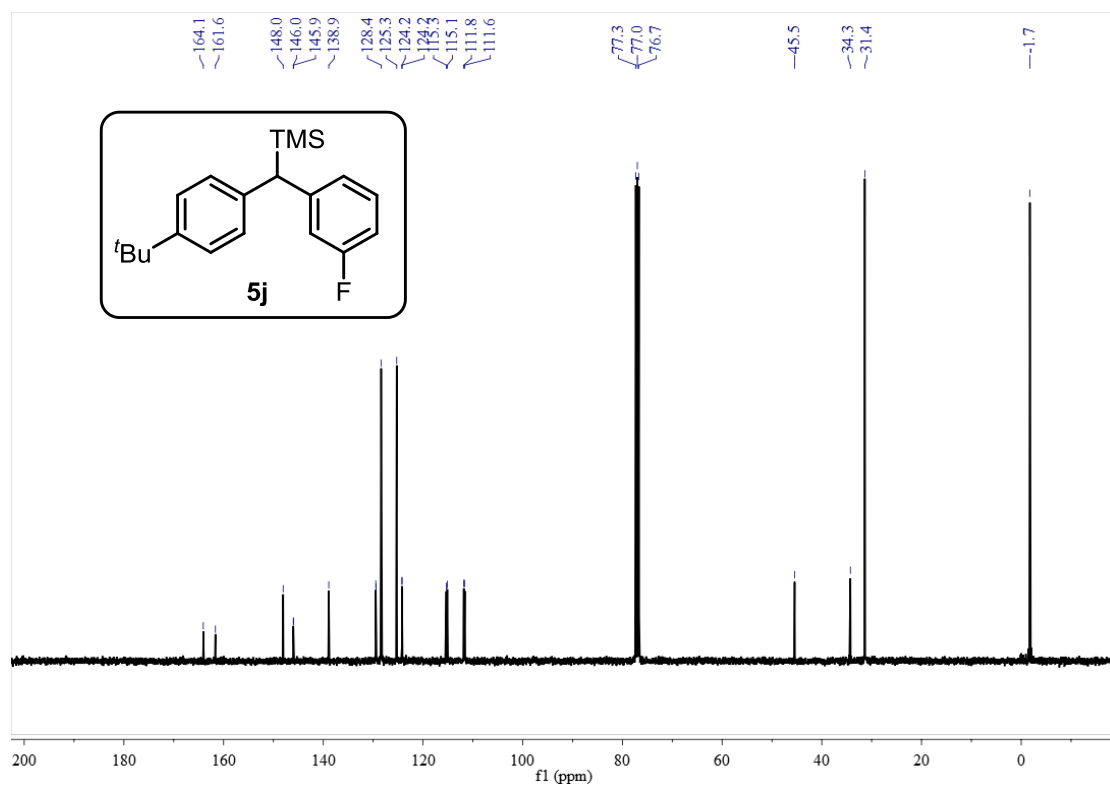

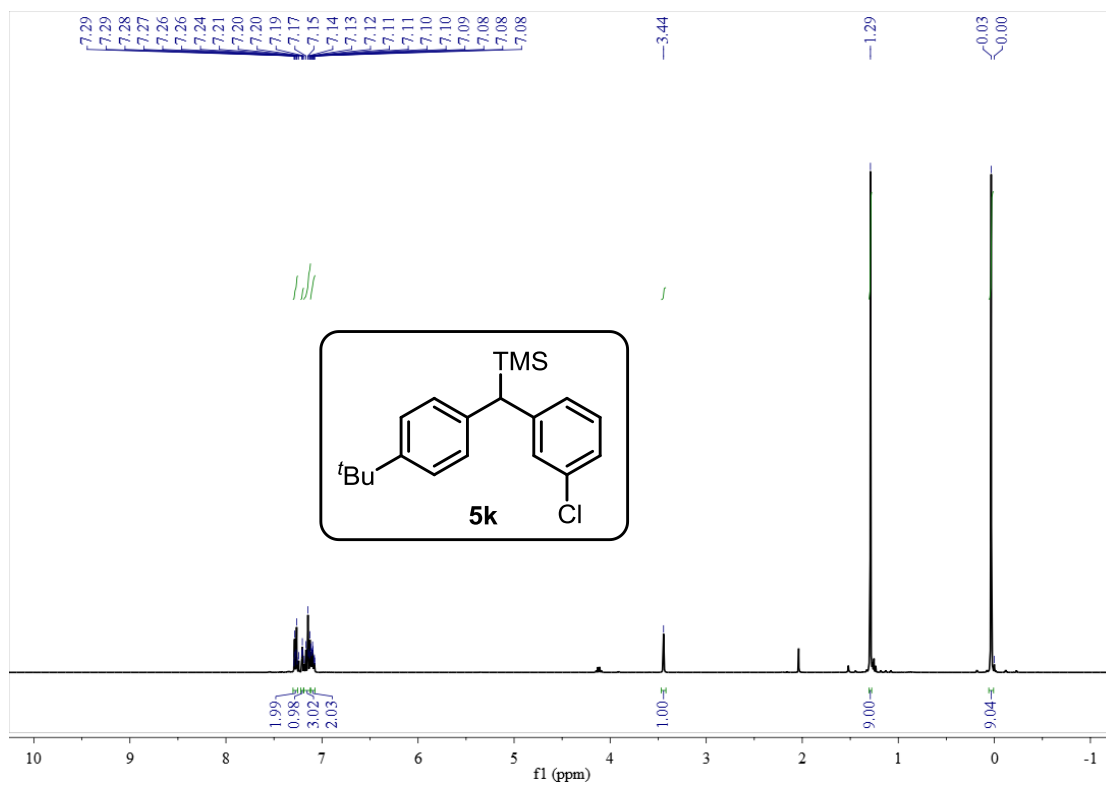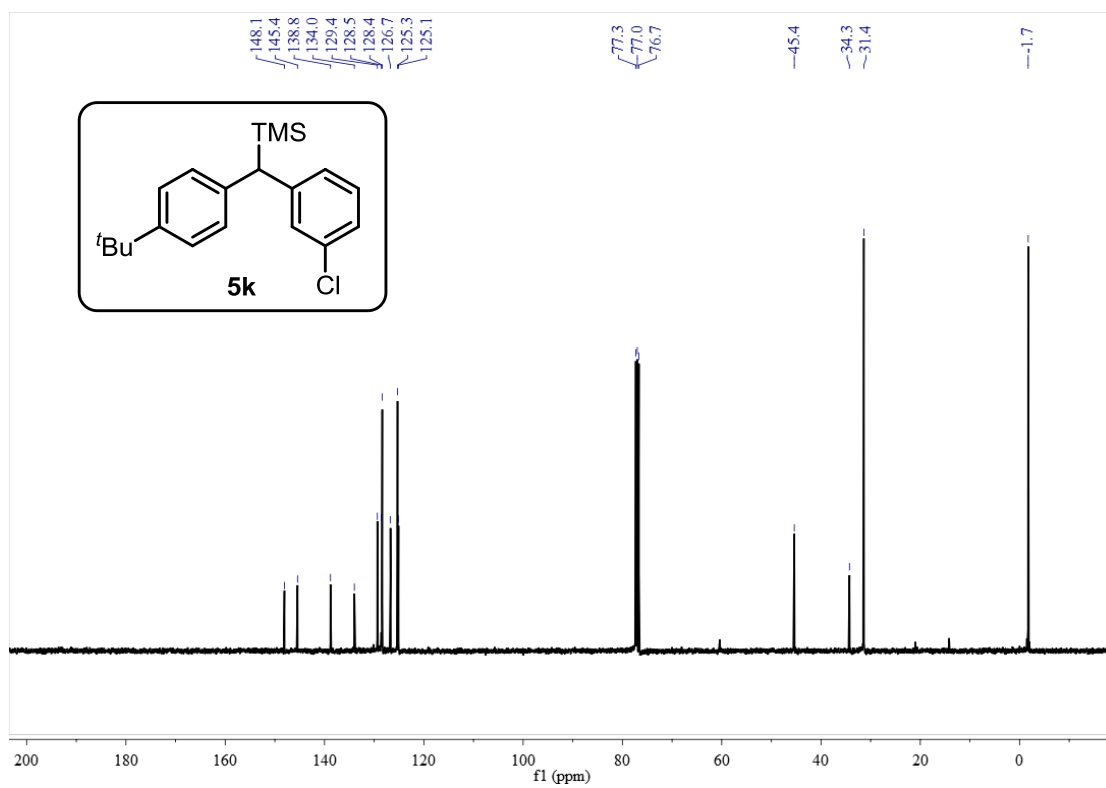

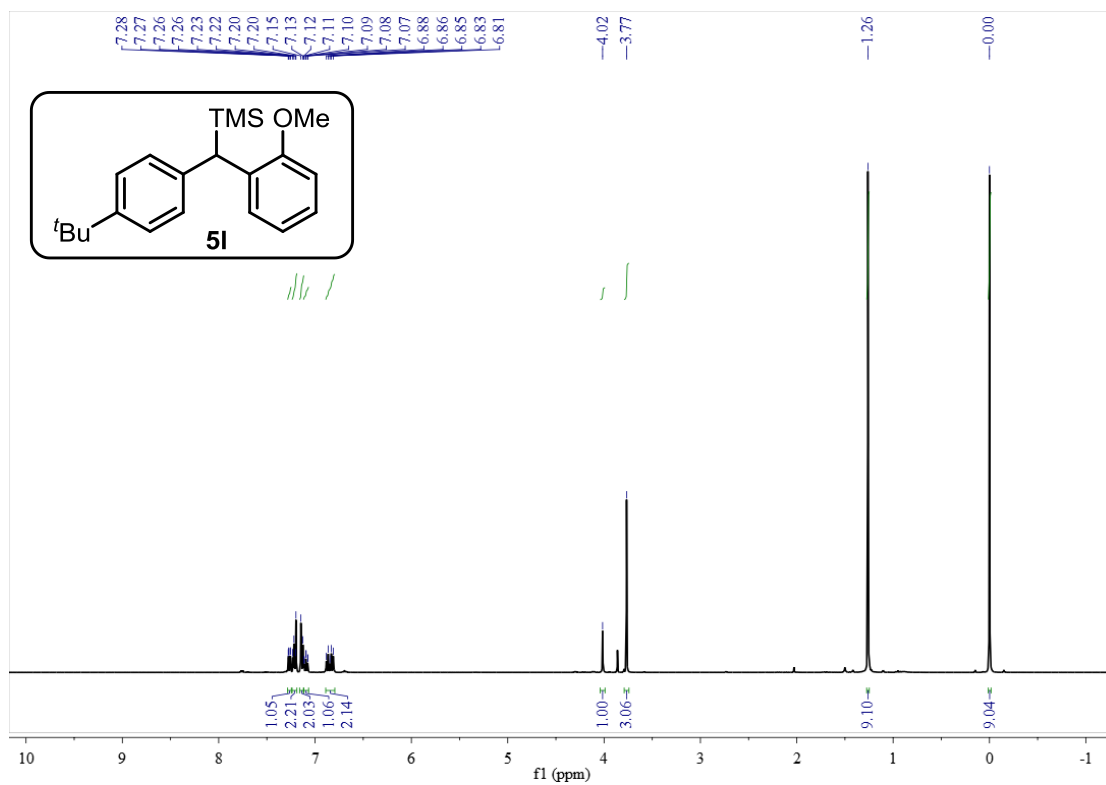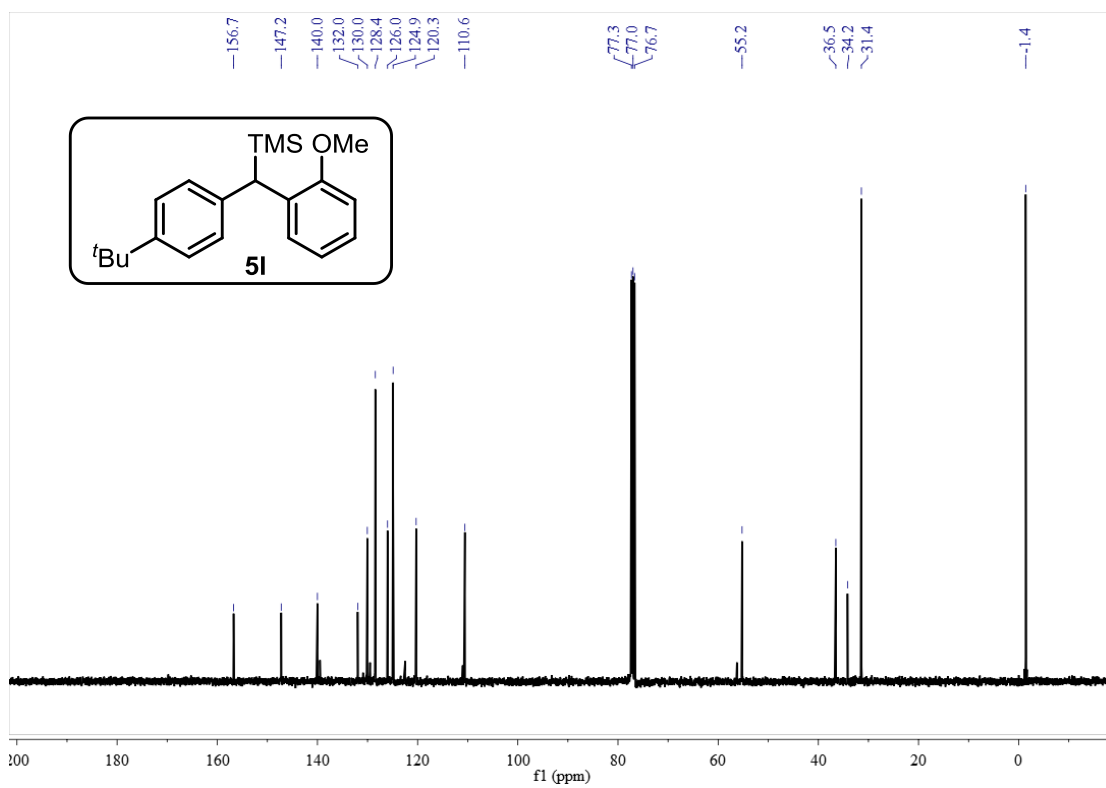

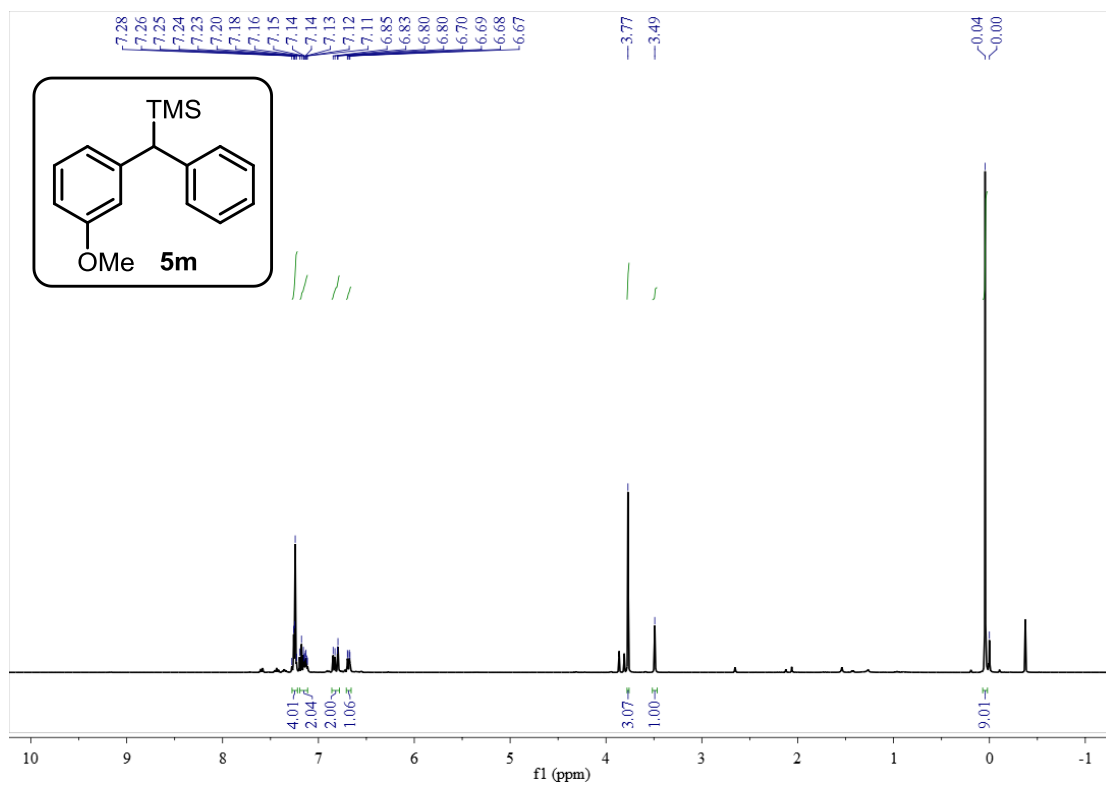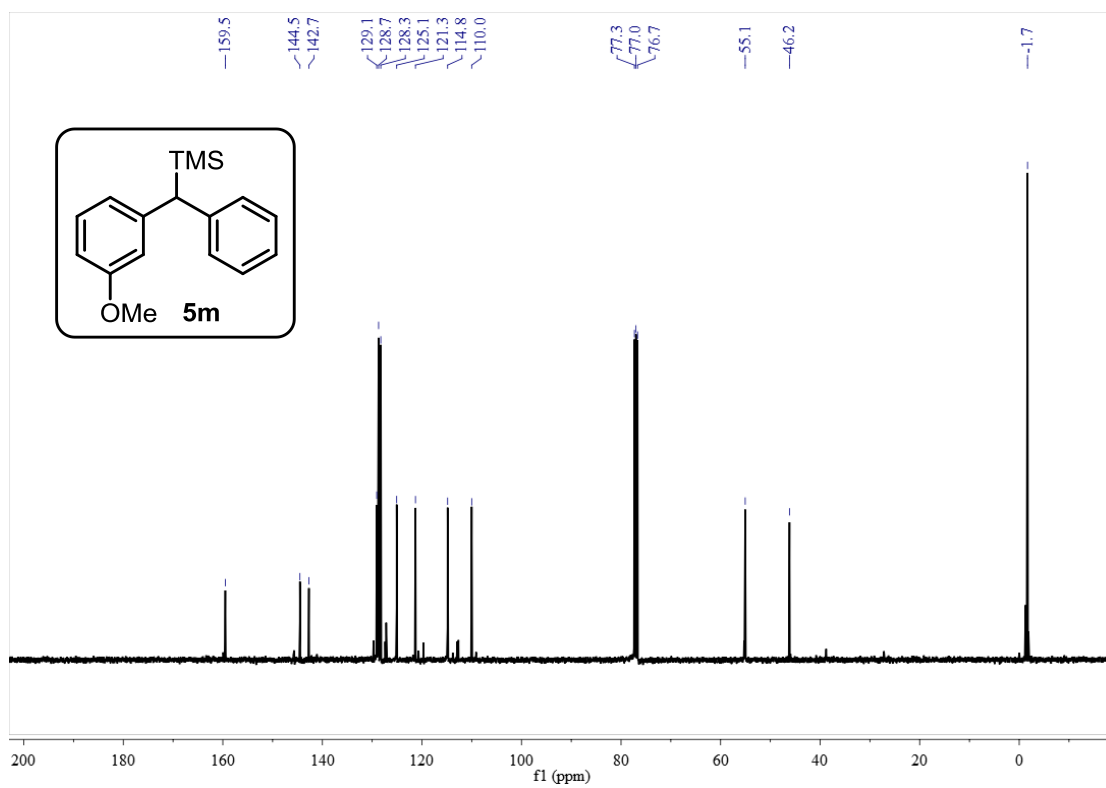

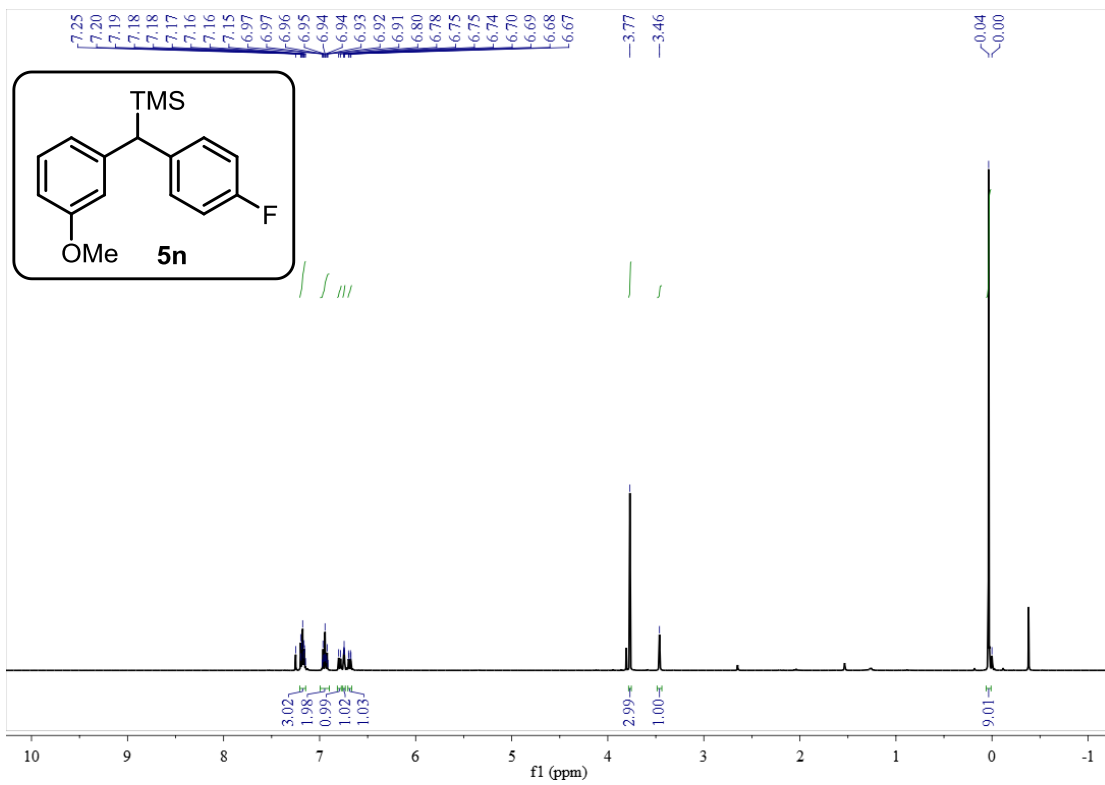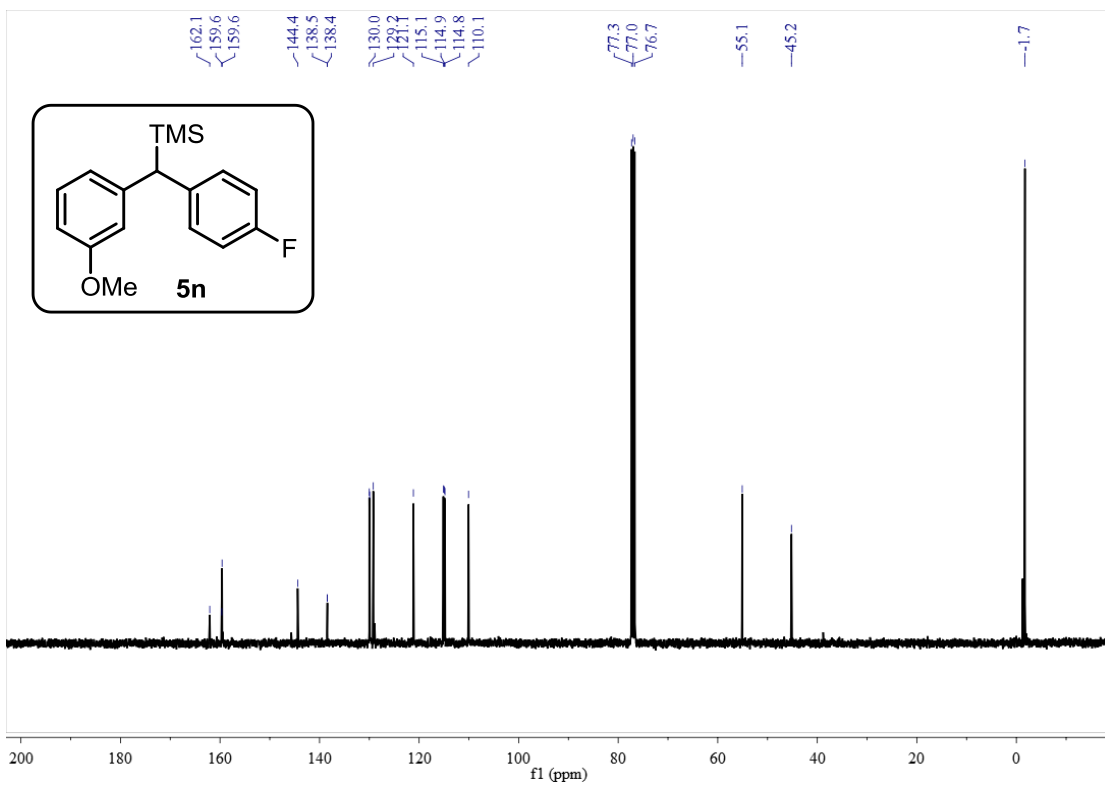

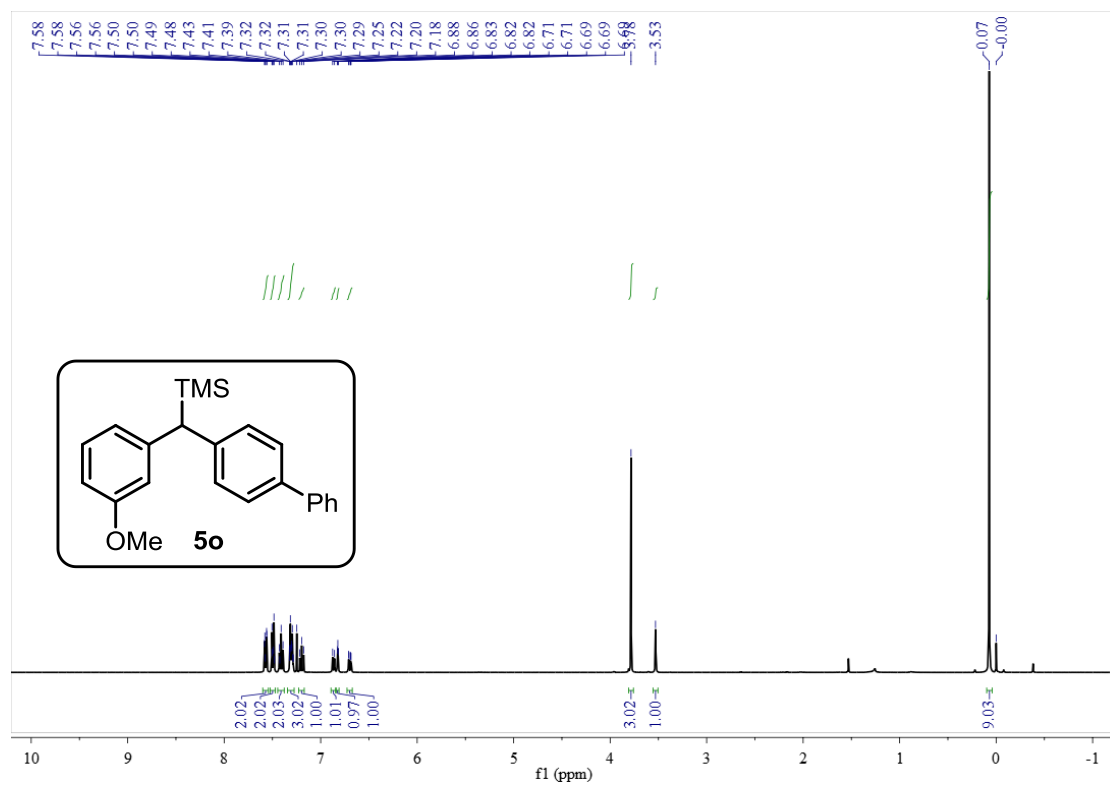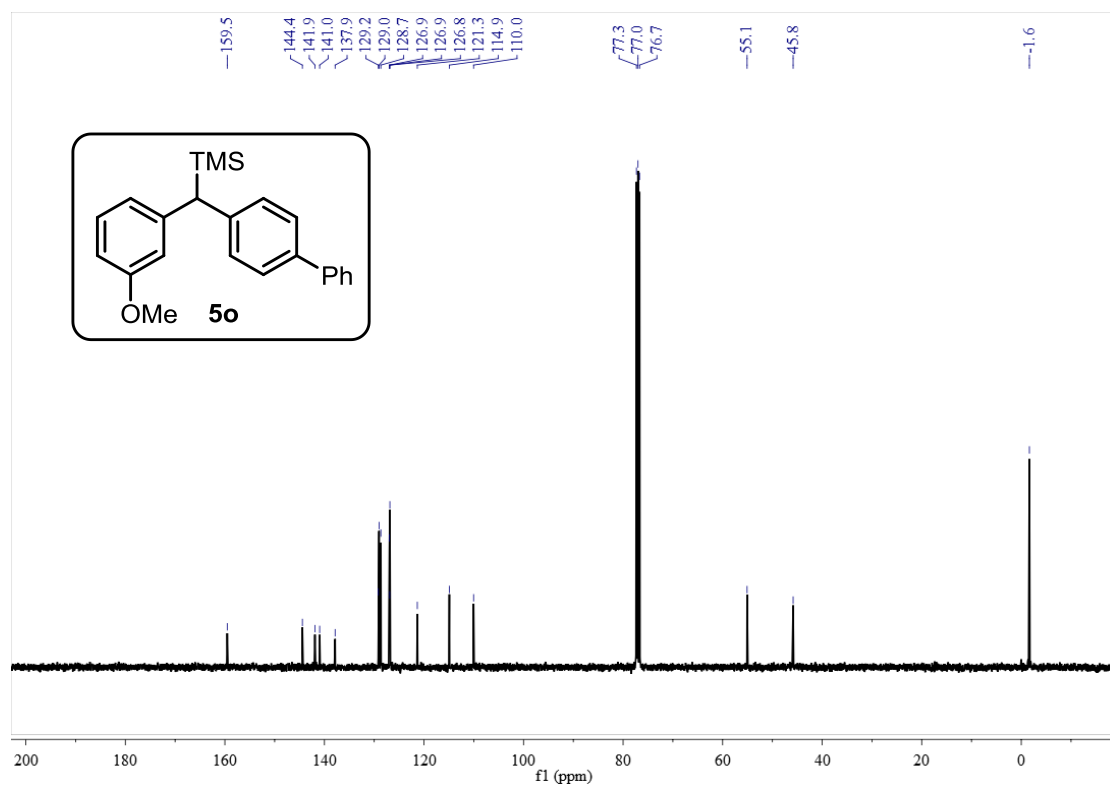

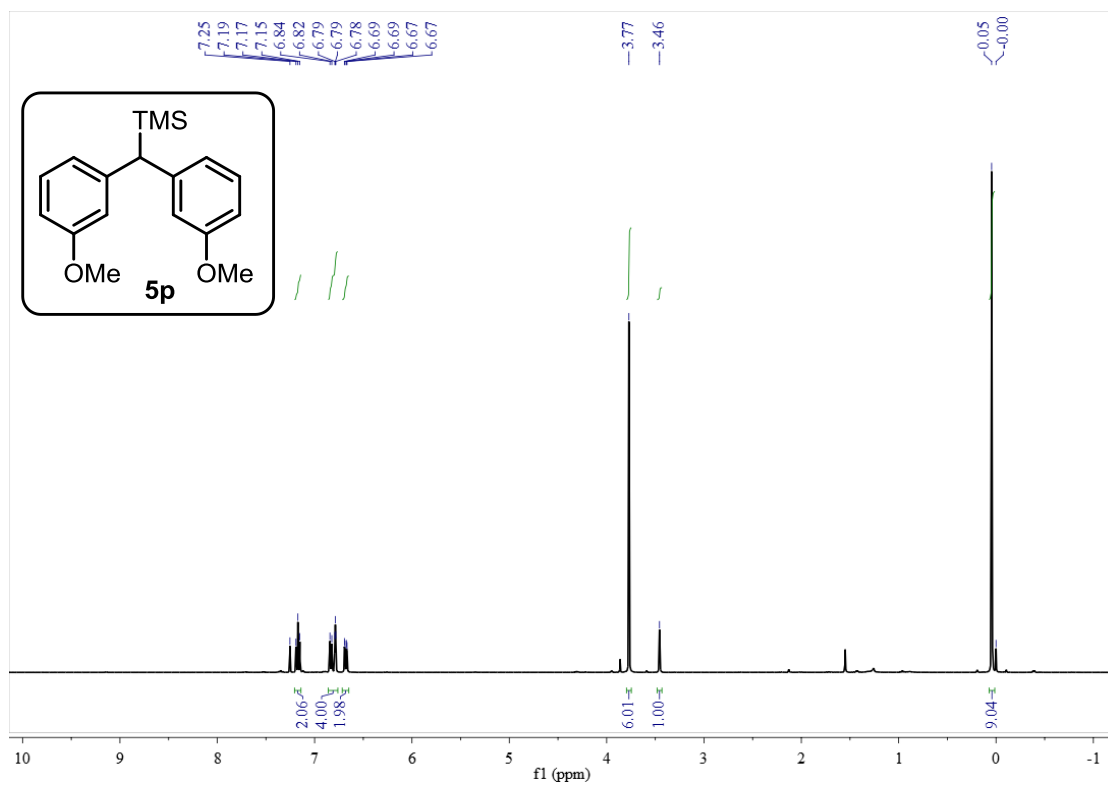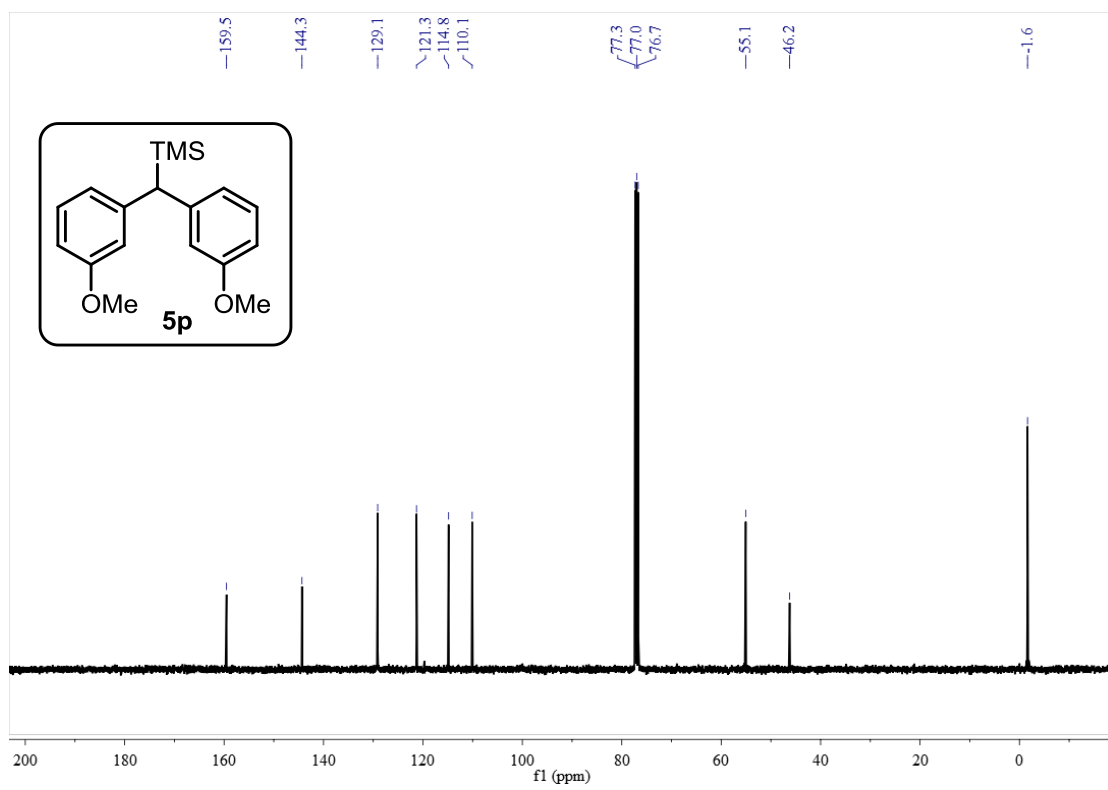



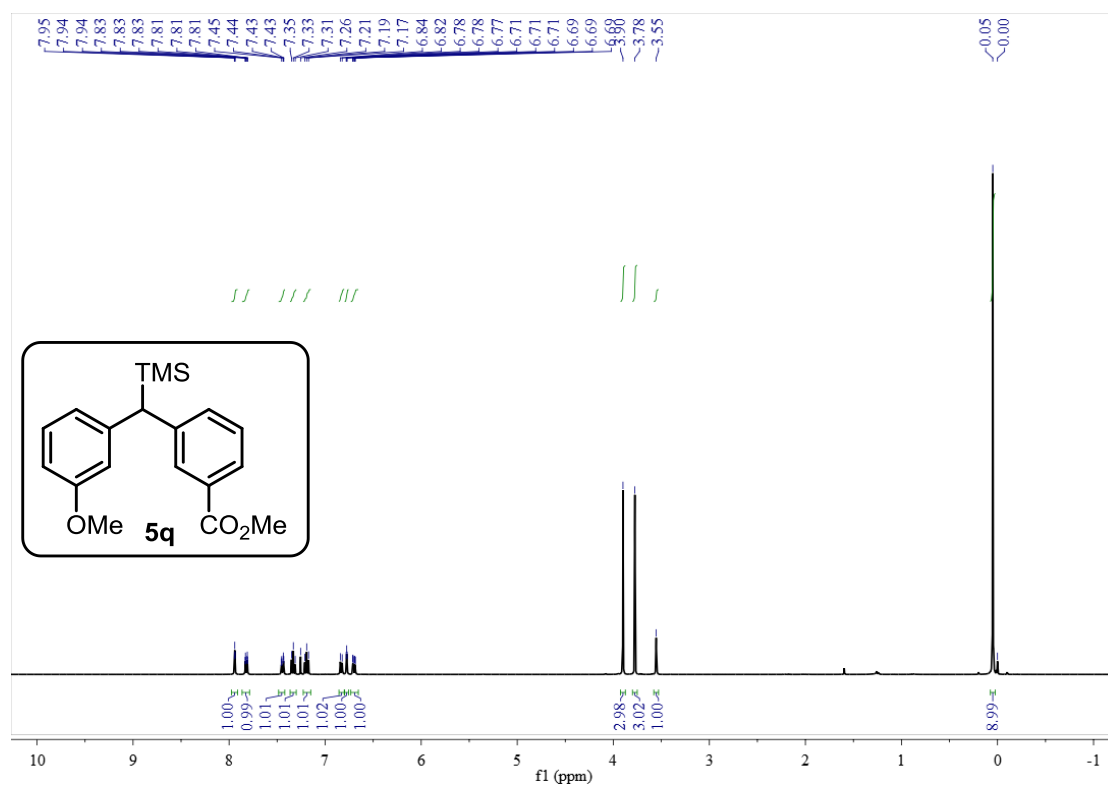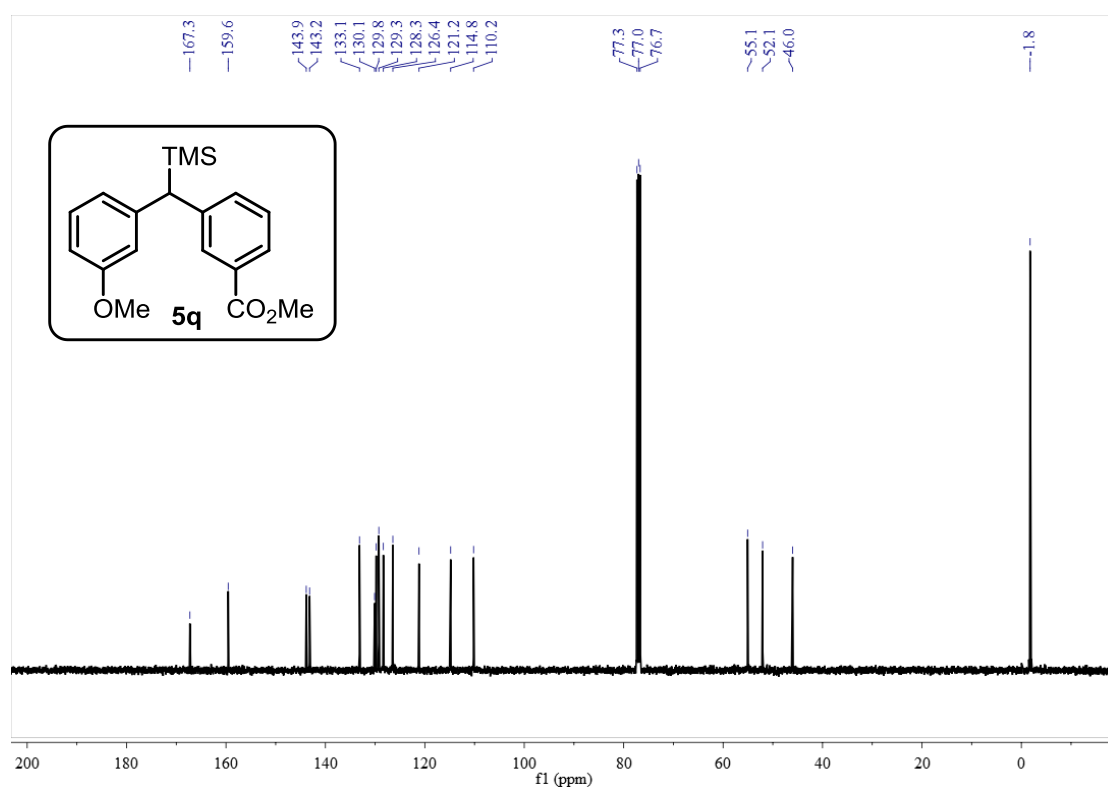

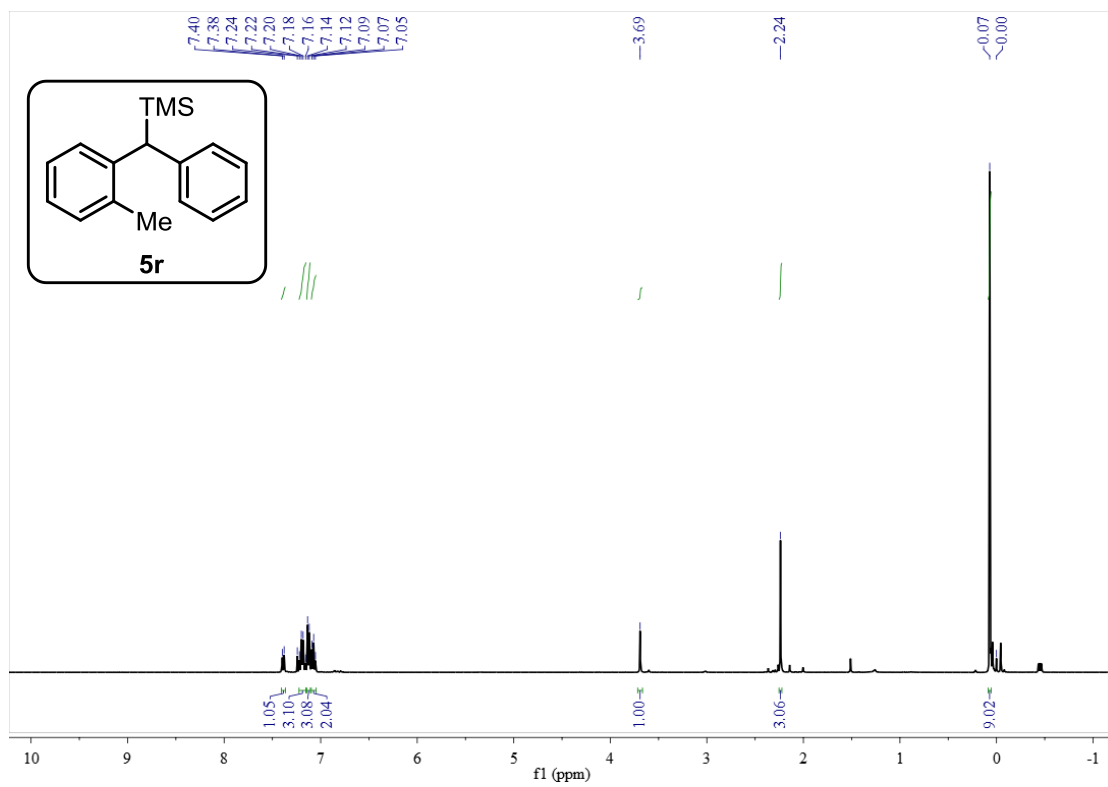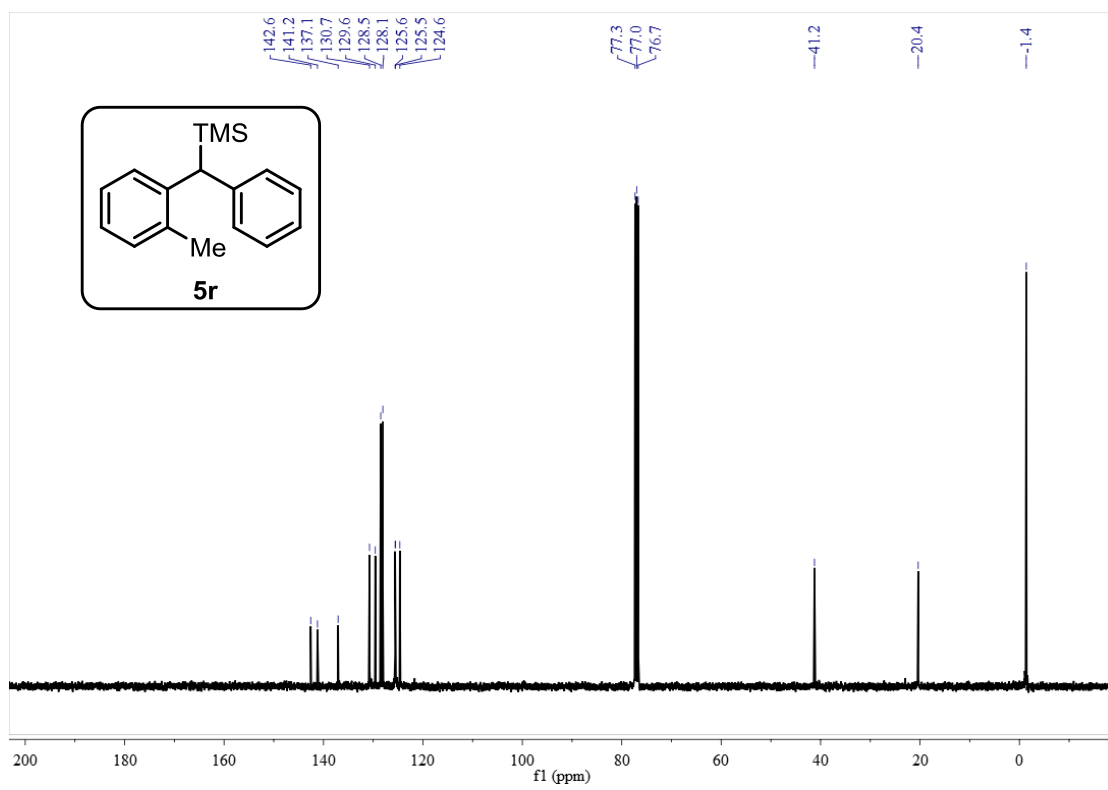

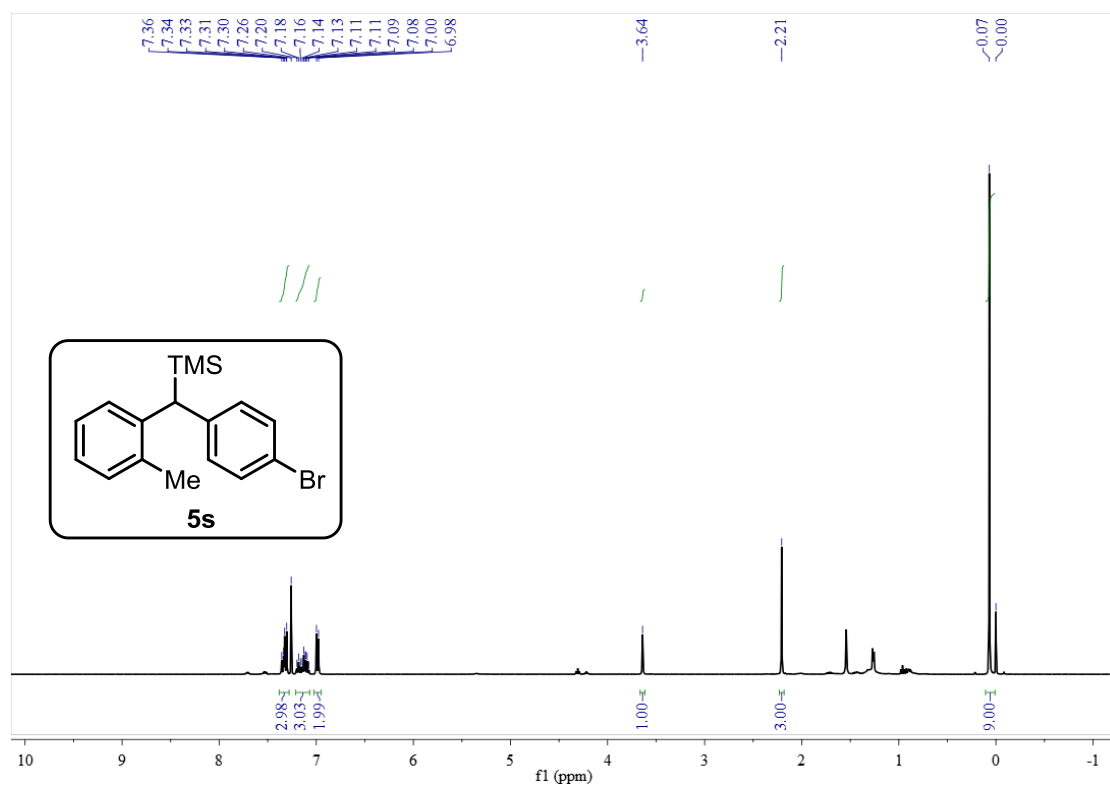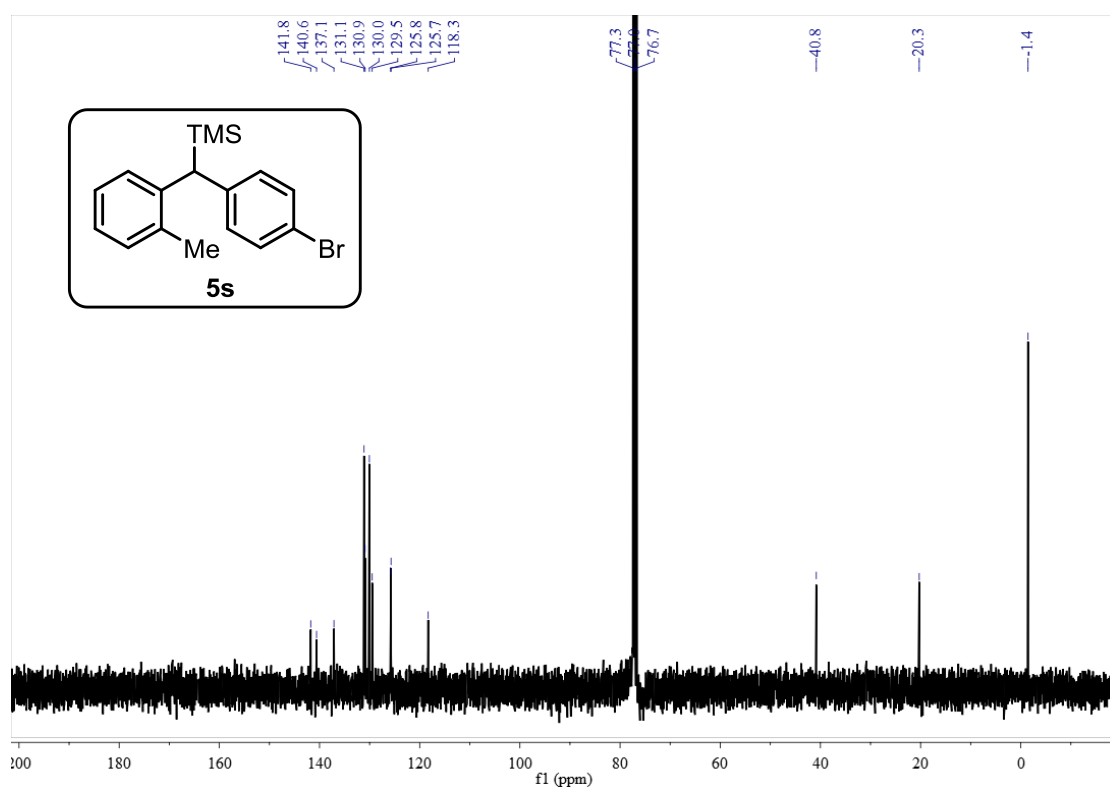

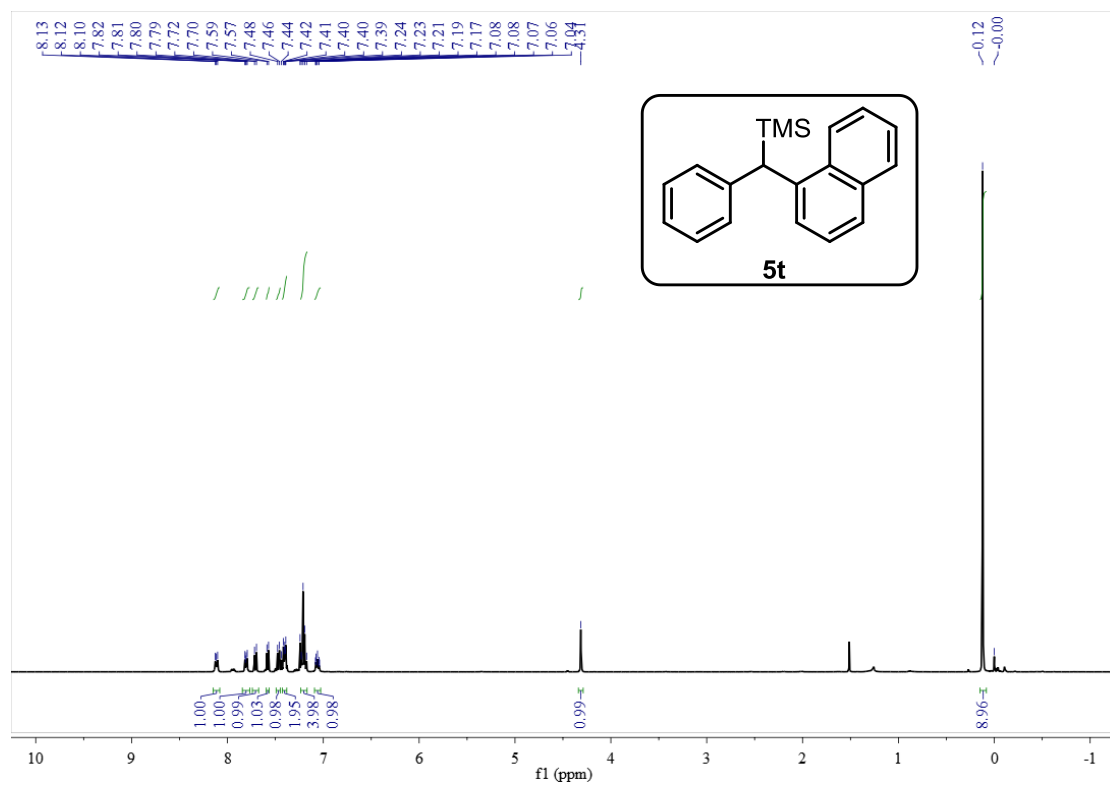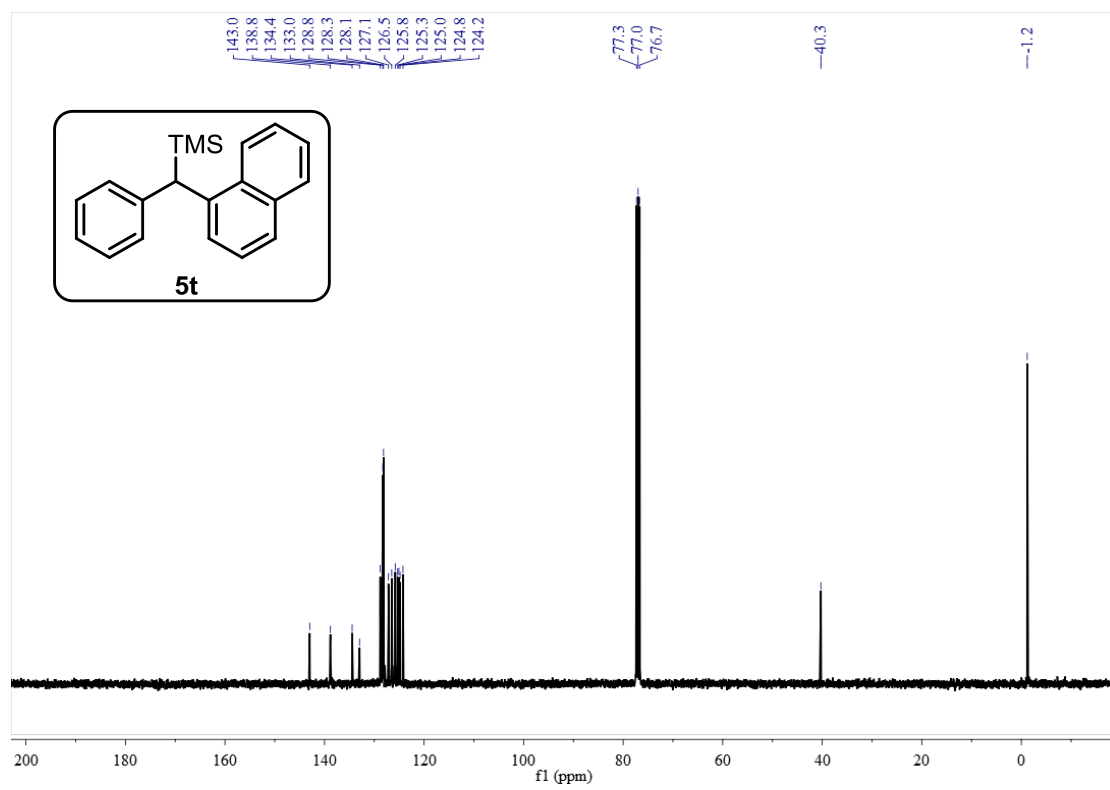

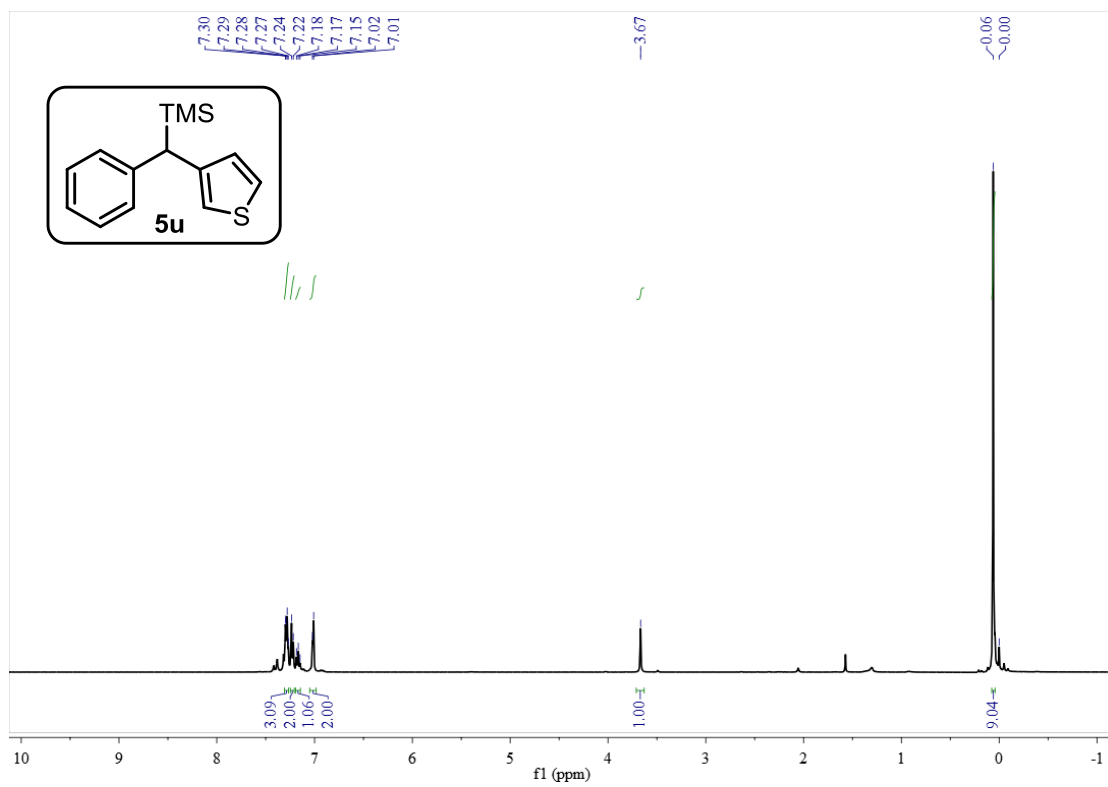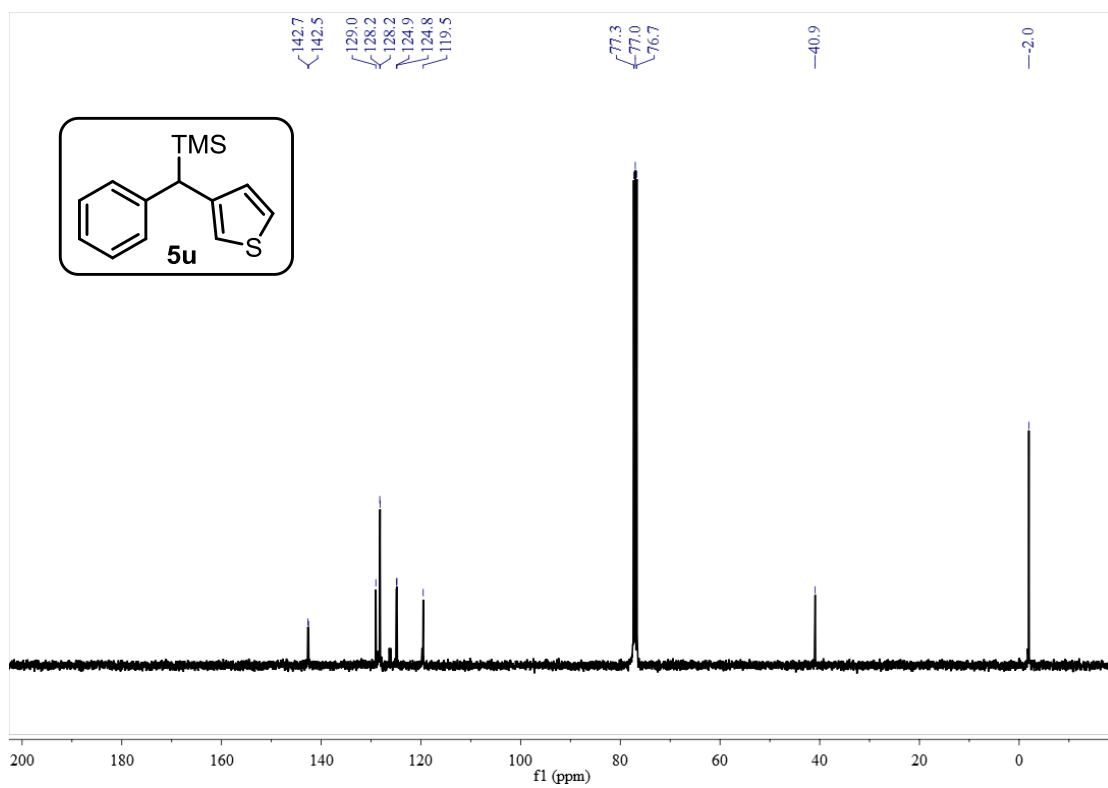

### 3. $^1\text{H}$ and $^{13}\text{C}$ NMR spectra of **6-10**

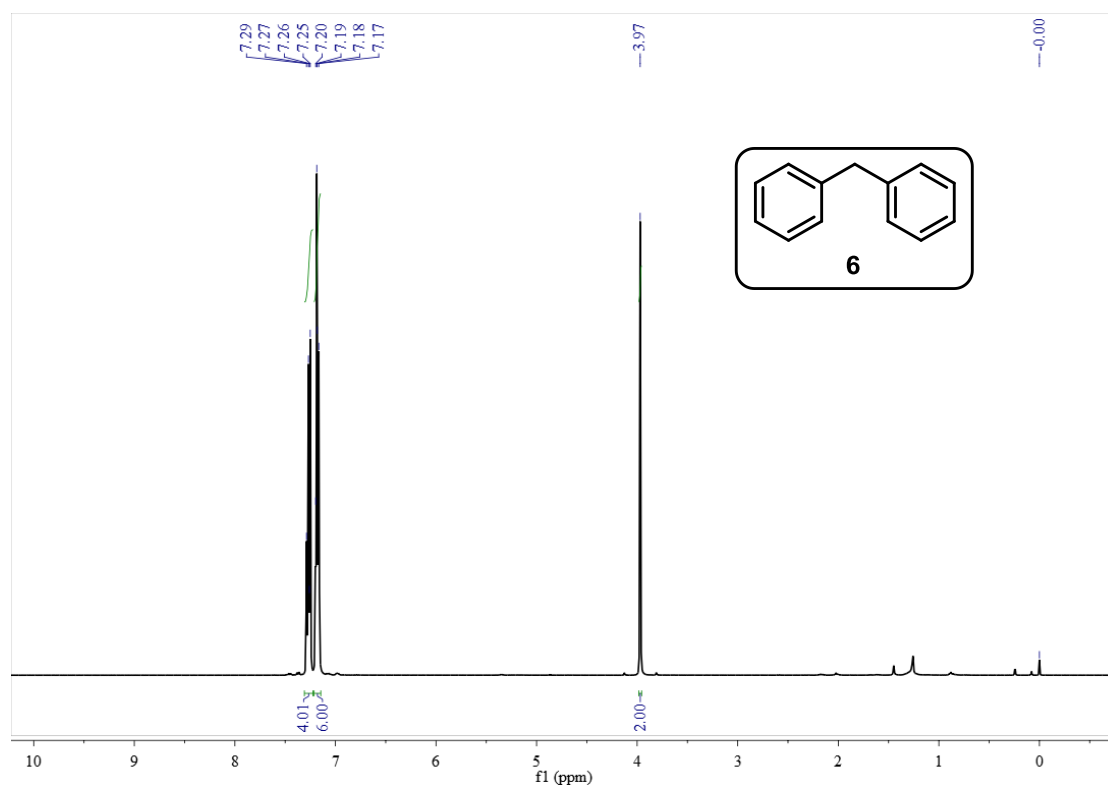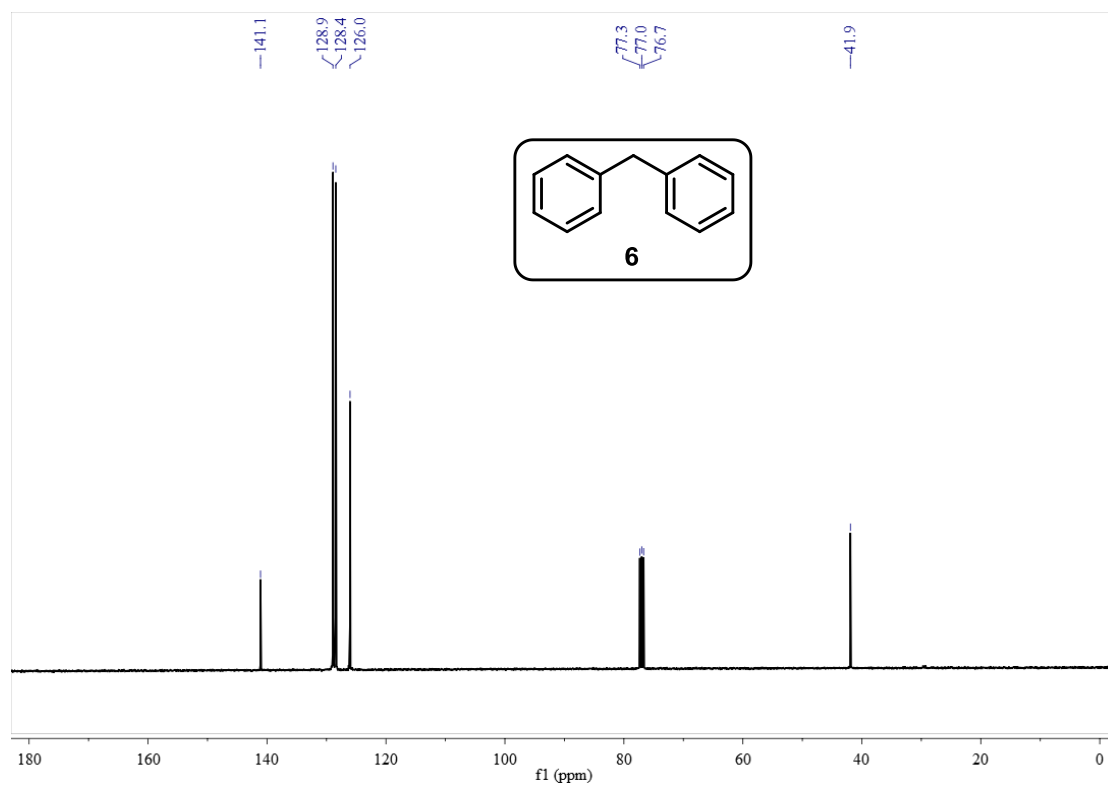

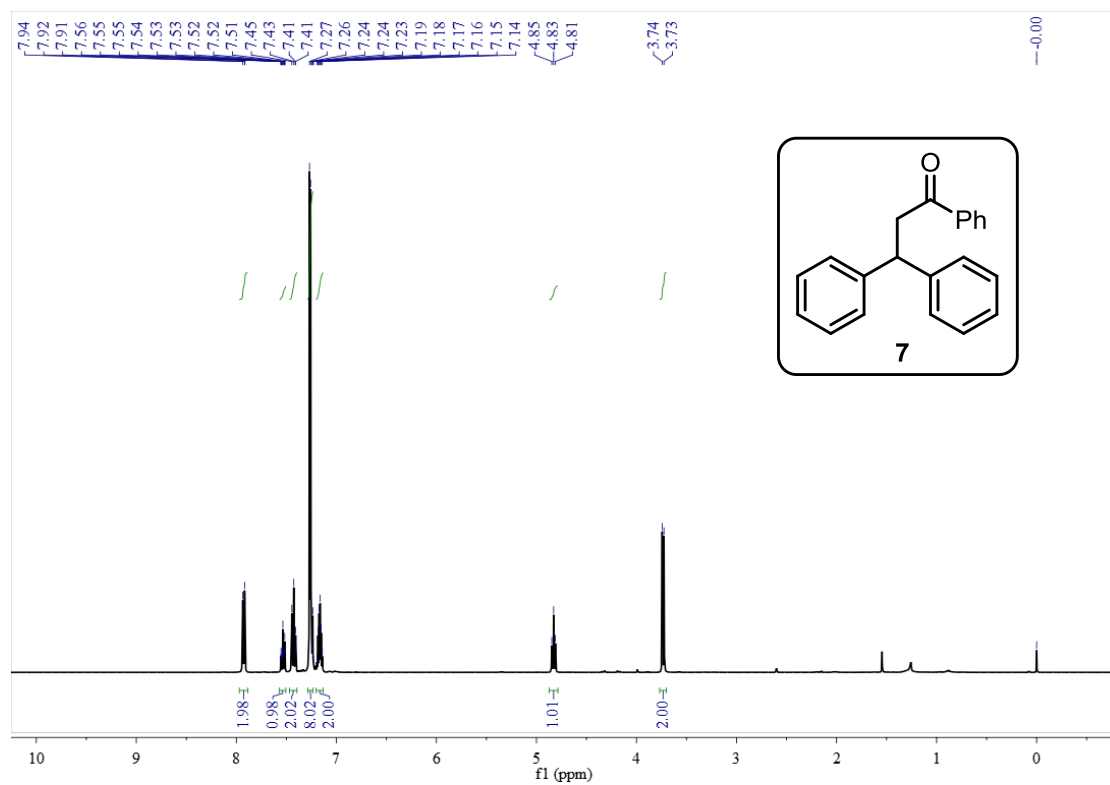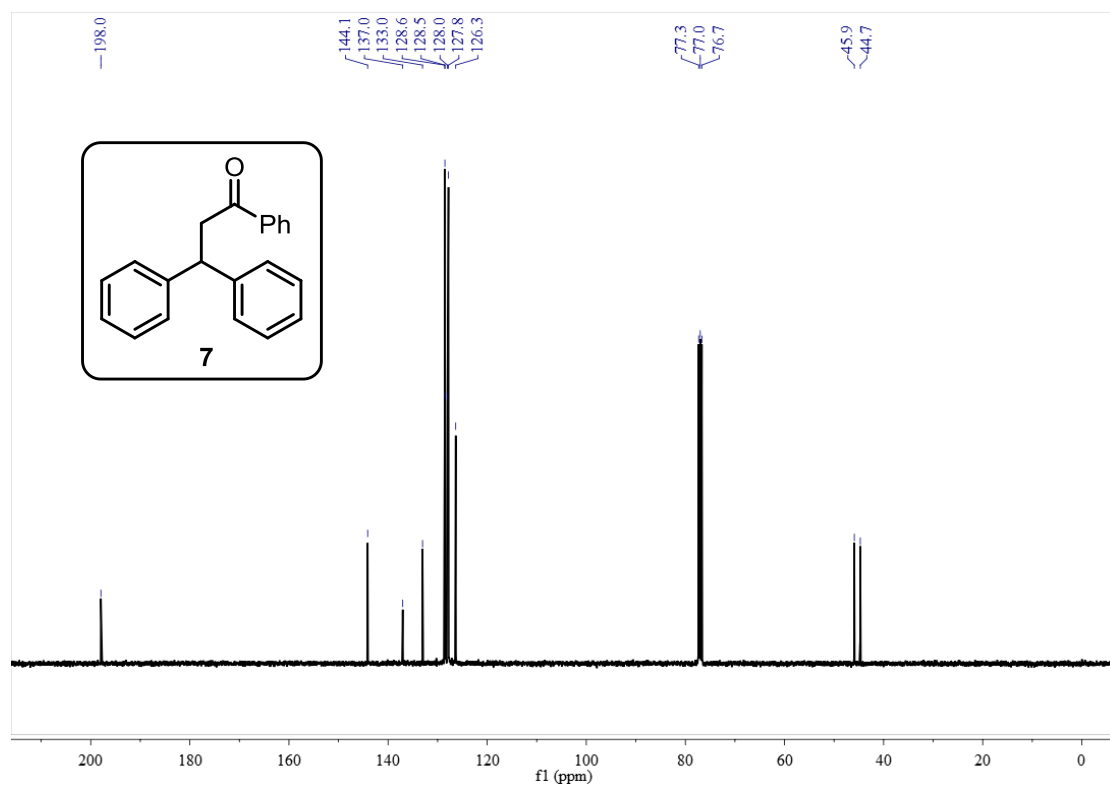

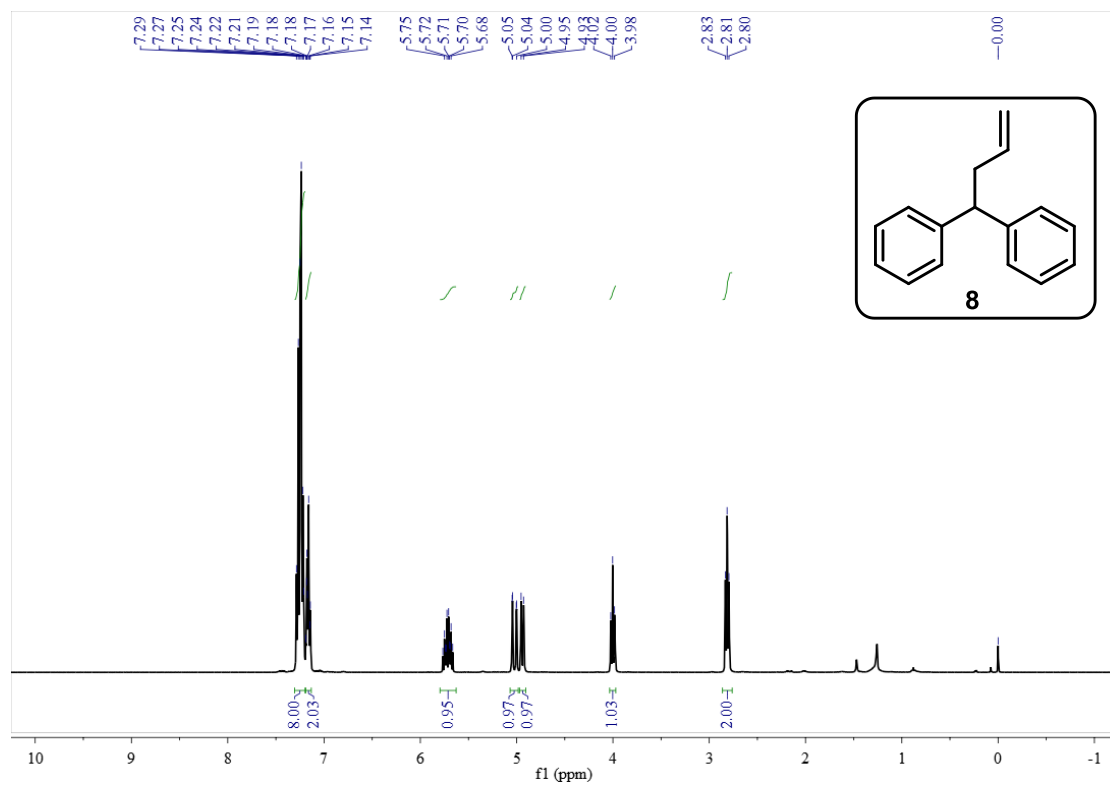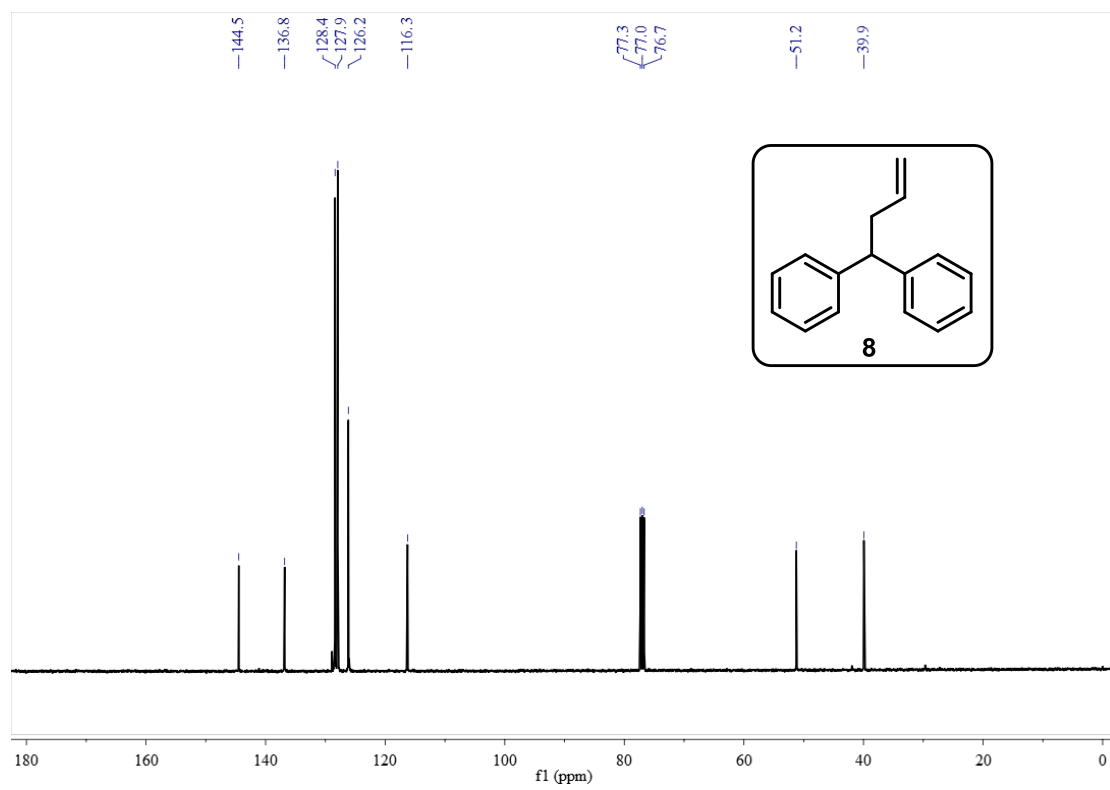



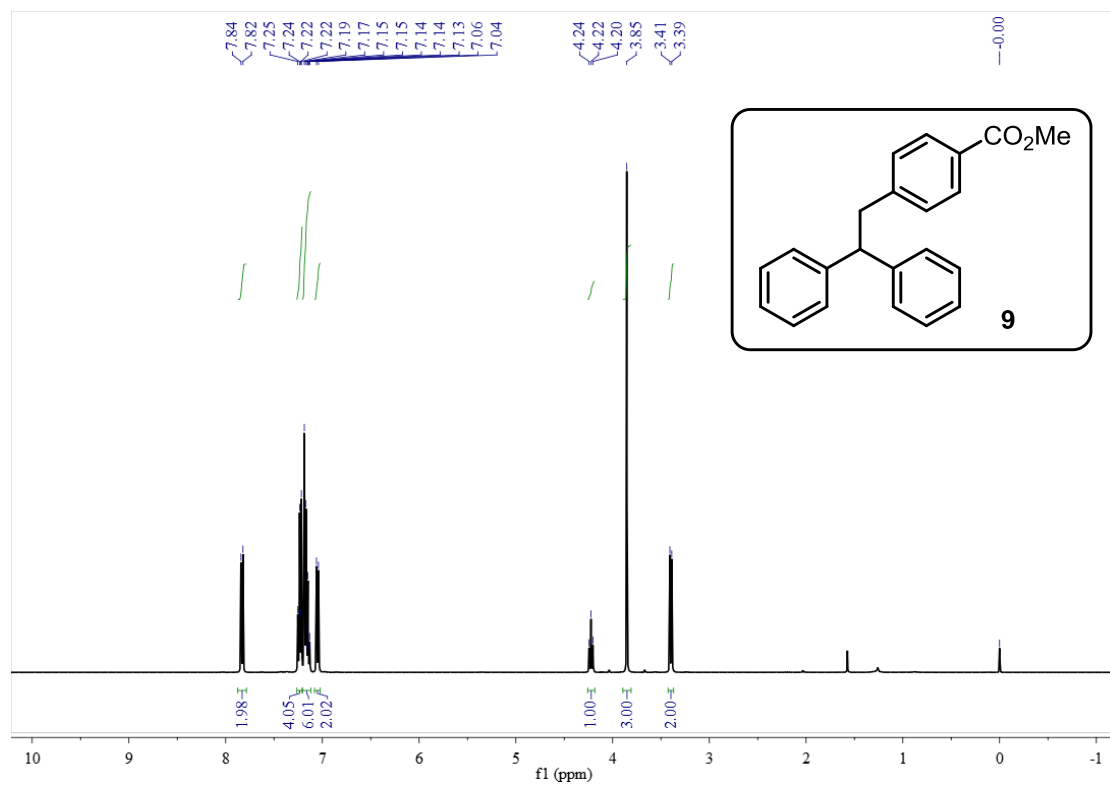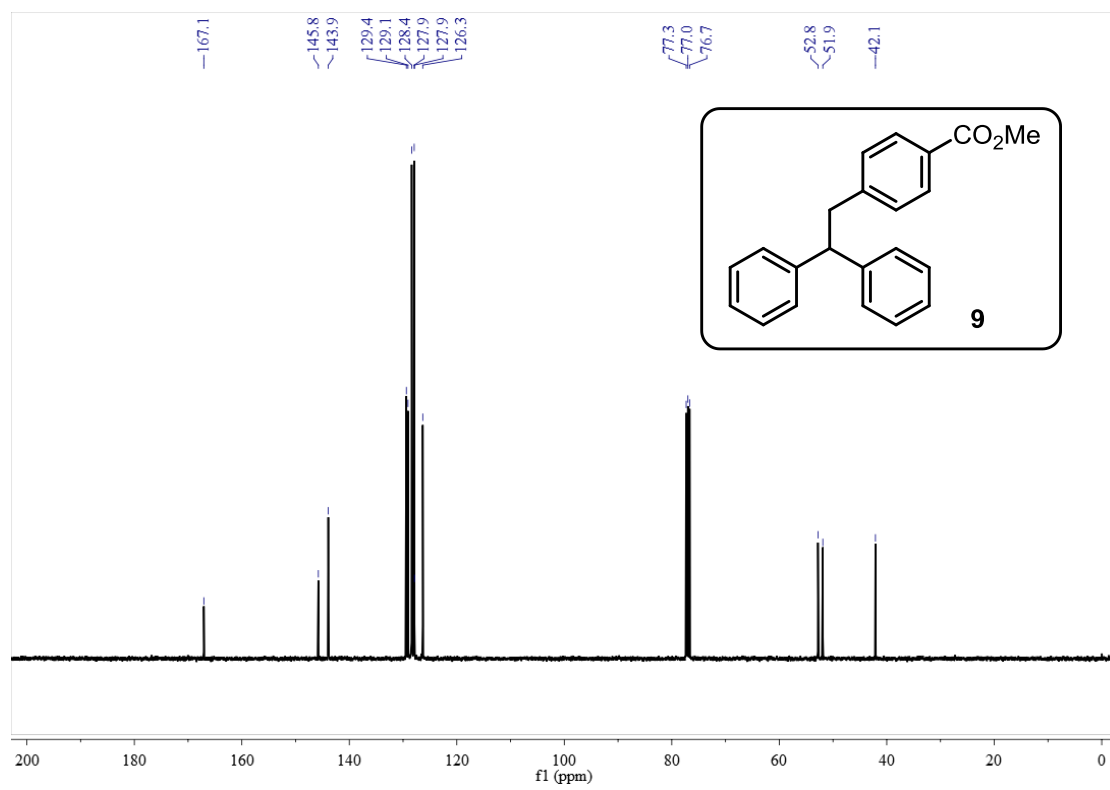

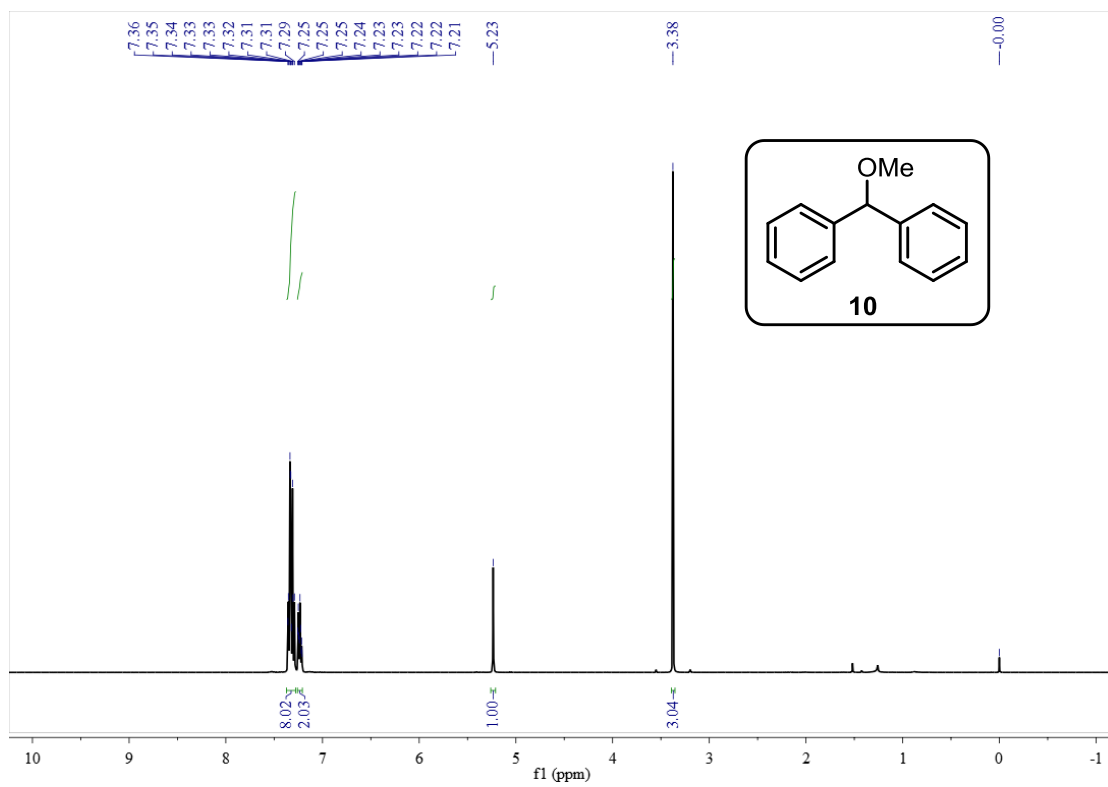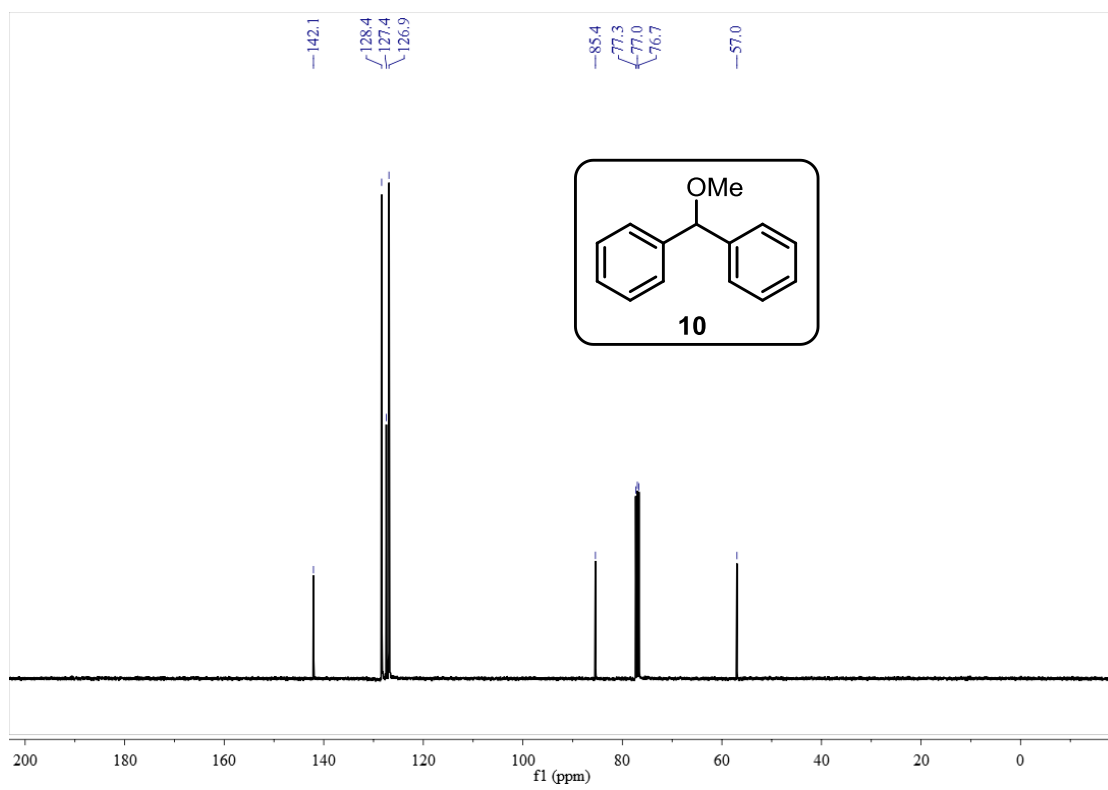

Supplement: c9ob01006h1.pdf [file c9ob01006h1.pdf]
